# Supplementary material for: Ligand-controlled switch in diastereoselectivities: catalytic asymmetric construction of spirocyclic pyrrolidine-azetidine/oxe(thie)tane derivatives
Source: Royal Society of Chemistry journal article supplement (doi:10.1039/c9cc03589c), 2019-01-01

# Ligand-Controlled Switch in Diastereoselectivities: Catalytic Asymmetric Construction of Spirocyclic Pyrrolidine-azetidine/oxe(thie)tane Derivatives

Hua Deng,<sup>†</sup> Renmeng Jia,<sup>†</sup> Wu-Lin Yang, Xingxin Yu\* and Wei-Ping Deng\*

Shanghai Key Laboratory of New Drug Design & School of Pharmacy, East China University of Science and Technology, 130 Meilong Road, Shanghai, 200237, China

## Table of Contents

|                                                                                                        |    |
|--------------------------------------------------------------------------------------------------------|----|
| <b>General information</b> .....                                                                       | 1  |
| <b>Table S1. Optimization of the reaction conditions</b> .....                                         | 2  |
| <b>General procedure</b> .....                                                                         | 3  |
| <b>Gram scale procedure</b> .....                                                                      | 15 |
| <b>Synthetic transformations of the cycloadduct 3aa</b> .....                                          | 15 |
| <b>Proposed transition states of the diastereodivergent asymmetric 1,3-dipolar cycloaddition</b> ..... | 17 |
| <b>References</b> .....                                                                                | 18 |
| <b>The absolute configuration determination of 3fa and 4fa</b> .....                                   | 19 |
| <b>Chiral HPLC Chromatograms</b> .....                                                                 | 22 |
| <b><sup>1</sup>H NMR and <sup>13</sup>C NMR spectra</b> .....                                          | 56 |

## General information

<sup>1</sup>H NMR spectrum were recorded on a Bruker AVANCE III 400 MHz spectrometer in CDCl<sub>3</sub>. Chemical shifts were reported in ppm with the internal TMS signal at 0.0 ppm as a standard. The spectrums are interpreted as: s = singlet, d = doublet, t = triplet, q = quartet, m = multiplet, dd = doublet of doublets, brs = broad singlet, coupling constant(s) *J* are reported in Hz and relative integrations are reported. <sup>13</sup>C NMR (100 MHz) spectrums were recorded on a Bruker AVANCE III 400 MHz spectrometer in CDCl<sub>3</sub>. Chemical shifts were reported in ppm with the internal chloroform signal at 77.06 ppm as a standard. Optical rotations were measured on an AUTOPOL V. Diastereomeric ratios and enantiomeric excesses were determined from crude <sup>1</sup>H NMR spectroscopy interpretation or by analysis of HPLC traces, obtained by using chiralpak AD-H columns with *n*-hexane and *i*-propanol or ethanol as solvents. (Chiralpak AD-H columns were purchased from Daicel Chemical Industries, LTD.) Melting points were obtained in open capillary tubes using SGW X-4 micro melting point apparatus which were uncorrected. Mass spectrums were recorded on TOF mass Waters GCT Premier and Xevo G2 spectrometer. Solvents were dried and distilled following usual protocols. Commercially available materials purchased from Adamas-beta, TCI or Energy Chemical and were used as received.

Imino esters<sup>1</sup> and exocyclic alkenes: *tert*-butyl 3-(2-methoxy-2-oxoethylidene)azetidine-1-carboxylate (**2b**),<sup>2</sup> *tert*-butyl 3-(2-ethoxy-2-oxoethylidene)azetidine-1-carboxylate (**2c**)<sup>2</sup> and 2-(1-tosylazetidin-3-ylidene)acetonitrile (**2d**),<sup>2</sup> 2-(oxetan-3-ylidene)acetonitrile (**2e**),<sup>2</sup> methyl 2-(oxetan-3-ylidene)acetate (**2f**),<sup>2</sup> 2-(thietan-3-ylidene)acetonitrile (**2g**),<sup>3</sup> ethyl 2-(thietan-3-ylidene)acetate (**2h**)<sup>2</sup>, *tert*-butyl 4-(cyanomethylene)piperidine-1-carboxylate (**2i**)<sup>4</sup> were prepared according to the literature procedure, *tert*-butyl 3-(cyanomethylene)azetidine-1-carboxylate (**2a**) were purchased from Bidepharm and were used as received.

**Table S1. Optimization of the reaction conditions**

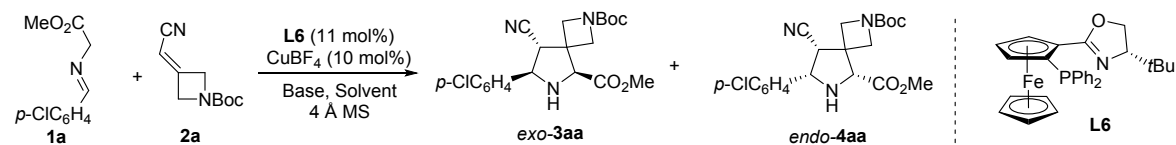

| Entry           | Solvent                           | Base                            | Metal                                | Yield(%) <sup>b</sup> | <i>exo/endo</i> <sup>c</sup> | ee(%) <sup>c</sup> |
|-----------------|-----------------------------------|---------------------------------|--------------------------------------|-----------------------|------------------------------|--------------------|
| 1               | CH <sub>2</sub> Cl <sub>2</sub>   | Cs <sub>2</sub> CO <sub>3</sub> | CuBF <sub>4</sub>                    | 96                    | 8:1                          | 97                 |
| 2               | THF                               | Cs <sub>2</sub> CO <sub>3</sub> | CuBF <sub>4</sub>                    | 94                    | 7:1                          | 97                 |
| 3               | Et <sub>2</sub> O                 | Cs <sub>2</sub> CO <sub>3</sub> | CuBF <sub>4</sub>                    | 95                    | 7:1                          | 96                 |
| 4               | TBME                              | Cs <sub>2</sub> CO <sub>3</sub> | CuBF <sub>4</sub>                    | 96                    | 7:1                          | 96                 |
| 5               | (CH <sub>2</sub> Cl) <sub>2</sub> | Cs <sub>2</sub> CO <sub>3</sub> | CuBF <sub>4</sub>                    | 97                    | 6:1                          | 97                 |
| 6               | toluene                           | Cs <sub>2</sub> CO <sub>3</sub> | CuBF <sub>4</sub>                    | 95                    | 4:1                          | 95                 |
| 7               | CH <sub>3</sub> CN                | Cs <sub>2</sub> CO <sub>3</sub> | CuBF <sub>4</sub>                    | 95                    | 4:1                          | 95                 |
| 8               | CHCl <sub>3</sub>                 | Cs <sub>2</sub> CO <sub>3</sub> | CuBF <sub>4</sub>                    | 96                    | 8:1                          | 96                 |
| 9               | Dioxane                           | Cs <sub>2</sub> CO <sub>3</sub> | CuBF <sub>4</sub>                    | 97                    | 8:1                          | 96                 |
| 10              | 2-MeTHF                           | Cs <sub>2</sub> CO <sub>3</sub> | CuBF <sub>4</sub>                    | 89                    | 8:1                          | 95                 |
| 11              | CH <sub>3</sub> OH                | Cs <sub>2</sub> CO <sub>3</sub> | CuBF <sub>4</sub>                    | trace                 | -                            | -                  |
| 12              | THF/CH <sub>3</sub> OH            | Cs <sub>2</sub> CO <sub>3</sub> | CuBF <sub>4</sub>                    | trace                 | -                            | -                  |
| 13 <sup>d</sup> | CH <sub>2</sub> Cl <sub>2</sub>   | DBU                             | CuBF <sub>4</sub>                    | 96                    | 4:1                          | 97                 |
| 14 <sup>d</sup> | CH <sub>2</sub> Cl <sub>2</sub>   | Et <sub>3</sub> N               | CuBF <sub>4</sub>                    | 93                    | 8:1                          | 93                 |
| 15 <sup>e</sup> | CH <sub>2</sub> Cl <sub>2</sub>   | K <sub>2</sub> CO <sub>3</sub>  | CuBF <sub>4</sub>                    | 96                    | 7:1                          | 96                 |
| 16 <sup>d</sup> | CH <sub>2</sub> Cl <sub>2</sub>   | LiHMDS                          | CuBF <sub>4</sub>                    | 92                    | 7:1                          | 95                 |
| 17 <sup>d</sup> | CH <sub>2</sub> Cl <sub>2</sub>   | DIPEA                           | CuBF <sub>4</sub>                    | trace                 | -                            | -                  |
| 18 <sup>d</sup> | CH <sub>2</sub> Cl <sub>2</sub>   | TMG                             | CuBF <sub>4</sub>                    | 84                    | 4:1                          | 95                 |
| 19 <sup>d</sup> | CH <sub>2</sub> Cl <sub>2</sub>   | DABCO                           | CuBF <sub>4</sub>                    | 60                    | 8:1                          | 97                 |
| 20 <sup>d</sup> | CH <sub>2</sub> Cl <sub>2</sub>   | <i>t</i> BuOK                   | CuBF <sub>4</sub>                    | 92                    | 6:1                          | 97                 |
| 21 <sup>d</sup> | CH <sub>2</sub> Cl <sub>2</sub>   | DMAP                            | CuBF <sub>4</sub>                    | NR                    | -                            | -                  |
| 22 <sup>e</sup> | CH <sub>2</sub> Cl <sub>2</sub>   | Na <sub>2</sub> CO <sub>3</sub> | CuBF <sub>4</sub>                    | 94                    | 8:1                          | 96                 |
| 23 <sup>d</sup> | CH <sub>2</sub> Cl <sub>2</sub>   | NaOH                            | CuBF <sub>4</sub>                    | 94                    | 9:1                          | 95                 |
| 24 <sup>d</sup> | CH <sub>2</sub> Cl <sub>2</sub>   | KOH                             | CuBF <sub>4</sub>                    | 94                    | 8:1                          | 96                 |
| 25              | CH <sub>2</sub> Cl <sub>2</sub>   | Cs <sub>2</sub> CO <sub>3</sub> | CuPF <sub>6</sub>                    | 70                    | 4:1                          | 94                 |
| 26              | CH <sub>2</sub> Cl <sub>2</sub>   | Cs <sub>2</sub> CO <sub>3</sub> | Cu(OTf) <sub>2</sub>                 | 93                    | 9:1                          | 96                 |
| 27              | CH <sub>2</sub> Cl <sub>2</sub>   | Cs <sub>2</sub> CO <sub>3</sub> | CuOAc                                | 86                    | 4:1                          | 95                 |
| 28              | CH <sub>2</sub> Cl <sub>2</sub>   | Cs <sub>2</sub> CO <sub>3</sub> | AgSbF <sub>6</sub>                   | 88                    | 1.3:1                        | 76/81              |
| 29              | CH <sub>2</sub> Cl <sub>2</sub>   | Cs <sub>2</sub> CO <sub>3</sub> | AgF                                  | 91                    | 1.6:1                        | 73/84              |
| 30              | CH <sub>2</sub> Cl <sub>2</sub>   | Cs <sub>2</sub> CO <sub>3</sub> | AgBF <sub>4</sub>                    | 79                    | 1.3:1                        | 73/85              |
| 31              | CH <sub>2</sub> Cl <sub>2</sub>   | Cs <sub>2</sub> CO <sub>3</sub> | AgClO <sub>4</sub> ·H <sub>2</sub> O | NR                    | -                            | -                  |
| 32              | CH <sub>2</sub> Cl <sub>2</sub>   | Cs <sub>2</sub> CO <sub>3</sub> | Ag <sub>2</sub> CO <sub>3</sub>      | 94                    | 1.3:1                        | 73/77              |

<sup>a</sup> Unless otherwise stated, the reactions were performed with **1a** (0.12 mmol), **2a** (0.10 mmol) in 1.0 mL of solvent, under an N<sub>2</sub> atmosphere at rt, 1 equiv of base was used, CuBF<sub>4</sub> = Cu(MeCN)<sub>4</sub>BF<sub>4</sub>, CuPF<sub>6</sub> = Cu(MeCN)<sub>4</sub>PF<sub>6</sub>, TMG = Tetramethylguanidine. <sup>b</sup> Isolated yield. <sup>c</sup> The ratio of *exo/endo* was determined by <sup>1</sup>H NMR spectroscopy or/and chiral HPLC analysis, and the ee was determined by chiral HPLC analysis. <sup>d</sup> 20 mol% of base was used. <sup>e</sup> 2 equiv of base was used.

## General procedure

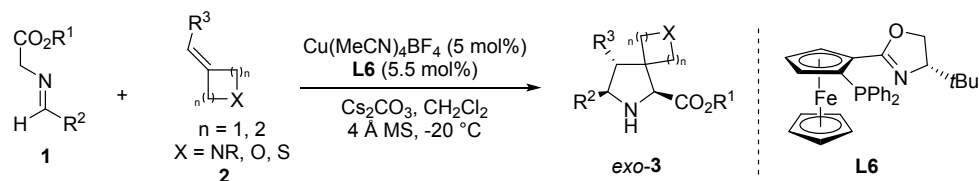

At a nitrogen atmosphere,  $\text{Cu}(\text{CH}_3\text{CN})_4\text{BF}_4$  (3.1 mg, 0.01 mmol) and **L6** (5.8 mg, 0.011 mmol) were dissolved in 2.0 mL dry  $\text{CH}_2\text{Cl}_2$ , subsequently add 4 Å Ms (100 mg), and stirred at room temperature for about 1 h. Then, iminoester **1** (0.24 mmol) and  $\text{Cs}_2\text{CO}_3$  (65.2 mg, 0.2 mmol) were added, the mixture was cooled to  $-20^\circ\text{C}$  and alkene **2** (0.2 mmol) was added. Once starting material was consumed (about 0.5-1 h, monitored by TLC), the mixture was concentrated and the residue was purified by column chromatography (petroleum ether/ethyl acetate 6:1 to 2:1) on silica gel to afford the corresponding product **3**.

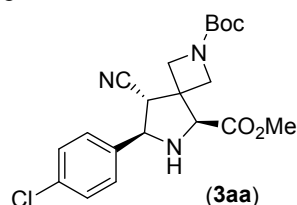

**2-(tert-Butyl) 5-methyl (5S,7R,8R)-7-(4-chlorophenyl)-8-cyano-2,6-diazaspiro[3.4]octane-2,5-dicarboxylate** White solid, yield: 98%; m.p.:  $165\text{--}167^\circ\text{C}$ ;  $[\alpha]_{\text{D}}^{25} = +134.5$  ( $c$  1.00,  $\text{CH}_2\text{Cl}_2$ );  $^1\text{H NMR}$  (400 MHz,  $\text{CDCl}_3$ )  $\delta$  7.49 – 7.42 (m, 2H), 7.39 – 7.33 (m, 2H), 4.35 (d,  $J = 9.3$  Hz, 1H), 4.29 (d,  $J = 9.1$  Hz, 1H), 4.13 (s, 1H), 4.05 (d,  $J = 9.2$  Hz, 1H), 3.94 (d,  $J = 9.7$  Hz, 1H), 3.86 (d,  $J = 9.8$  Hz, 1H), 3.83 (s, 3H), 3.22 (d,  $J = 9.3$  Hz, 1H), 2.52 (brs, 1H), 1.45 (s, 9H).  $^{13}\text{C NMR}$  (100 MHz,  $\text{CDCl}_3$ )  $\delta$  172.4, 155.8, 137.5, 134.6, 129.2 (2C), 128.1 (2C), 116.9, 80.4, 66.2, 63.5, 58.2, 54.2, 52.7, 46.0, 45.3, 28.3 (3C). **HRMS** (ESI-TOF) calcd for  $[\text{C}_{20}\text{H}_{24}\text{ClN}_3\text{O}_4+\text{H}]^+$ : 406.1528, found: 406.1532; **HPLC** (Chiralpak AD-H,  $n$ -hexane/ $i$ -propanol = 80/20, 1.0 mL/min, 220 nm)  $t_{\text{R}} = 10.40$  min, 16.03 min.

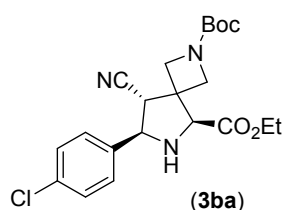

**2-(tert-Butyl) 5-ethyl (5S,7R,8R)-7-(4-chlorophenyl)-8-cyano-2,6-diazaspiro[3.4]octane-2,5-dicarboxylate** White solid, yield: 97%; m.p.:  $169\text{--}171^\circ\text{C}$ ;  $[\alpha]_{\text{D}}^{25} = +141.3$  ( $c$  1.00,  $\text{CH}_2\text{Cl}_2$ );  $^1\text{H NMR}$  (400 MHz,  $\text{CDCl}_3$ )  $\delta$  7.46 (d,  $J = 8.5$  Hz, 2H), 7.36 (d,  $J = 8.3$  Hz, 2H),  $\delta$  4.52 (d,  $J = 7.1$  Hz, 1H, minor), 4.41 – 4.23 (m, 4H), 4.17 (d,  $J = 8.9$  Hz, 1H, minor), 4.13 – 4.03 (m, 2H), 3.97 (d,  $J = 9.4$  Hz, 1H), 3.85 (d,  $J = 9.7$  Hz, 1H), 3.48 (d,  $J = 7.1$  Hz, 1H, minor), 3.21 (d,  $J = 9.1$  Hz, 1H), 2.54 (s, 1H), 1.45 (s, 9H), 1.35 (t,  $J = 7.1$  Hz, 3H).  $^{13}\text{C NMR}$  (100 MHz,  $\text{CDCl}_3$ )  $\delta$  (major + minor) 171.8, 171.1, 170.8, 155.7, 137.6, 134.5, 129.1 (2C), 129.0, 128.4, 128.0 (2C), 117.0, 80.3, 66.2, 63.5, 62.1, 61.9, 61.1, 60.4, 58.1, 54.4, 46.3, 46.1, 45.2, 45.0, 28.3 (3C), 21.0, 14.2. **HRMS** (ESI-TOF) calcd for  $[\text{C}_{21}\text{H}_{26}\text{ClN}_3\text{O}_4+\text{H}]^+$ : 420.1685, found: 420.1689; **HPLC** (Chiralpak AD-H,  $n$ -hexane/ $i$ -propanol = 80/20, 1.0 mL/min, 220 nm)  $t_{\text{R}} = 10.15$  min, 17.21 min.

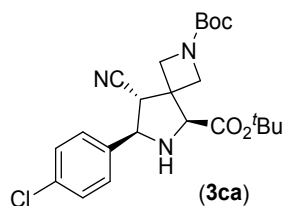

**2-(tert-Butyl) (5S,7R,8R)-7-(4-chlorophenyl)-8-cyano-2,6-diazaspiro[3.4]octane-2,5-dicarboxylate**

White solid, yield: 96%; m.p.: 174-176 °C;  $[\alpha]_D^{25} = +174.2$  (c 1.00, CH<sub>2</sub>Cl<sub>2</sub>); <sup>1</sup>H NMR (400 MHz, CDCl<sub>3</sub>) δ 7.45 (d, *J* = 8.5 Hz, 2H), 7.39 – 7.33 (m, 2H), 7.37 – 7.32 (m, 1H, minor), 4.52 (d, *J* = 7.5 Hz, 1H, minor), 4.35 (d, *J* = 8.6 Hz, 1H), 4.27 (d, *J* = 9.1 Hz, 1H), 4.17 (d, *J* = 8.8 Hz, 1H, minor), 4.09 (d, *J* = 9.2 Hz, 1H), 4.06 – 3.98 (m, 1H), 3.97 (s, 1H), 3.94 – 3.89 (m, 2H, minor), 3.86 (s, 1H, minor), 3.79 (d, *J* = 9.6 Hz, 1H), 3.48 (d, *J* = 7.5 Hz, 1H, minor), 3.16 (d, *J* = 8.6 Hz, 1H), 2.51 (brs, 1H), 1.56 (s, 9H, minor), 1.53 (s, 9H), 1.45 (s, 9H), 1.43 (s, 9H, minor). <sup>13</sup>C NMR (100 MHz, CDCl<sub>3</sub>) δ (major + minor) 170.7, 169.7, 155.6, 155.4, 137.8, 136.8, 134.5, 129.2 (2C), 129.0, 128.4, 128.0 (2C), 117.3, 116.1, 83.6, 83.2, 80.3, 66.8, 66.6, 63.5, 61.1, 57.5, 54.6, 46.6, 46.3, 45.0, 44.6, 28.4 (3C), 28.1 (3C), 28.0. HRMS (ESI-TOF) calcd for [C<sub>23</sub>H<sub>30</sub>ClN<sub>3</sub>O<sub>4</sub>+H]<sup>+</sup>: 448.1998, found: 448.2002; HPLC (Chiralpak AD-H, *n*-hexane/*i*-propanol = 80/20, 1.0 mL/min, 220 nm) *t*<sub>R</sub> = 8.63 min, 15.91 min.

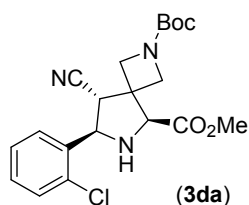

**2-(tert-Butyl) 5-methyl (5S,7R,8R)-7-(2-chlorophenyl)-8-cyano-2,6-diazaspiro[3.4]octane-2,5-dicarboxylate**

White solid, yield: 96%; m.p.: 156-158 °C;  $[\alpha]_D^{25} = +215.4$  (c 1.00, CH<sub>2</sub>Cl<sub>2</sub>); <sup>1</sup>H NMR (400 MHz, CDCl<sub>3</sub>) δ 7.80 (dd, *J* = 7.6, 1.9 Hz, 1H), 7.38 (dd, *J* = 7.7, 1.6 Hz, 1H), 7.35 – 7.21 (m, 2H), 4.98 (d, *J* = 5.3 Hz, 1H), 4.88 (d, *J* = 7.0 Hz, 1H, minor), 4.31 – 4.19 (m, 3H), 4.06 (s, 2H, minor), 4.02 (s, 1H, minor), 3.96 (d, *J* = 9.0 Hz, 1H, minor), 3.86 (s, 3H), 3.79 (d, *J* = 9.8 Hz, 1H), 3.74 (d, *J* = 7.1 Hz, 1H, minor), 3.46 (d, *J* = 9.8 Hz, 1H), 3.35 (d, *J* = 5.3 Hz, 1H), 2.61 (brs, 1H), 1.42 (s, 9H). <sup>13</sup>C NMR (100 MHz, CDCl<sub>3</sub>) δ 171.8, 155.8, 137.6, 132.9, 129.8, 129.6, 127.8, 127.5, 117.7, 80.3, 65.4, 60.0, 56.0, 56.0, 52.6, 45.8, 44.6, 28.3 (3C). HRMS (ESI-TOF) calcd for [C<sub>20</sub>H<sub>24</sub>ClN<sub>3</sub>O<sub>4</sub>+H]<sup>+</sup>: 406.1528, found: 406.1533; HPLC (Chiralpak AD-H, *n*-hexane/*i*-propanol = 80/20, 1.0 mL/min, 220 nm) *t*<sub>R</sub> = 8.36 min, 17.57 min.

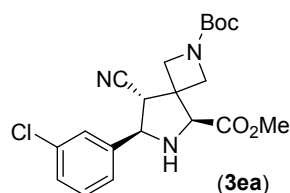

**2-(tert-Butyl) 5-methyl (5S,7R,8R)-7-(3-chlorophenyl)-8-cyano-2,6-diazaspiro[3.4]octane-2,5-dicarboxylate**

White solid, yield: 98%; m.p.: 165-167 °C;  $[\alpha]_D^{25} = +181.4$  (c 1.00, CH<sub>2</sub>Cl<sub>2</sub>); <sup>1</sup>H NMR (400 MHz, CDCl<sub>3</sub>) δ 7.53 (s, 1H), 7.40 – 7.35 (m, 1H), 7.34 – 7.31 (m, 2H), 4.50 (d, *J* = 7.2 Hz, 1H, minor), 4.35 (d, *J* = 9.2 Hz, 1H), 4.29 (d, *J* = 9.2 Hz, 1H), 4.13 (s, 1H), 4.06 (d, *J* = 9.2 Hz, 1H), 3.94 (d, *J* = 9.7 Hz, 1H), 3.90 – 3.87 (m, 1H), 3.84 (s, 3H), 3.49 (d, *J* = 6.9 Hz, 1H, minor), 3.25 (d, *J* = 9.2 Hz, 1H), 2.57 (brs, 1H), 1.46 (s, 9H). <sup>13</sup>C NMR (100 MHz, CDCl<sub>3</sub>) δ 172.2, 155.8, 141.1, 135.0, 130.3,

129.0, 126.8, 125.0, 116.9, 80.4, 66.2, 63.6, 58.1, 54.3, 52.7, 45.9, 45.2, 28.3 (3C). **HRMS** (ESI-TOF) calcd for  $[C_{20}H_{24}ClN_3O_4+H]^+$ : 406.1528, found: 406.1532; **HPLC** (Chiralpak AD-H, *n*-hexane/*i*-propanol = 80/20, 1.0 mL/min, 220 nm)  $t_R$  = 8.18 min, 24.12 min.

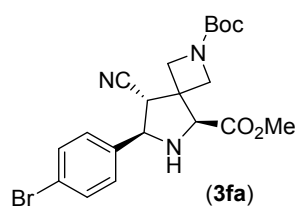

**2-(tert-Butyl) 5-methyl (5S,7R,8R)-7-(4-bromophenyl)-8-cyano-2,6-diazaspiro[3.4]octane-2,5-dicarboxylate** White solid, yield: 98%; m.p.: 169-171°C;  $[\alpha]_D^{25} = +152.7(c\ 1.00, CH_2Cl_2)$ ; **<sup>1</sup>H NMR** (400 MHz, CDCl<sub>3</sub>)  $\delta$  7.51 (d,  $J = 8.2$  Hz, 2H), 7.40 (d,  $J = 8.2$  Hz, 2H), 7.35 (d,  $J = 8.2$  Hz, 2H, minor), 4.49 (d,  $J = 6.9$  Hz, 1H, minor), 4.33 (d,  $J = 9.5$  Hz, 1H), 4.29 (d,  $J = 9.1$  Hz, 1H), 4.13 (s, 1H), 4.05 (d,  $J = 9.1$  Hz, 1H), 4.04 – 3.96 (m, 3H, minor), 3.93 (d,  $J = 9.8$  Hz, 1H), 3.90 – 3.85 (m, 1H), 3.83 (s, 3H), 3.48 (d,  $J = 6.9$  Hz, 1H, minor), 3.22 (d,  $J = 9.2$  Hz, 1H), 2.55 (brs, 1H), 1.45 (s, 9H). **<sup>13</sup>C NMR** (100 MHz, CDCl<sub>3</sub>)  $\delta$  172.4, 155.8, 138.0, 132.1 (2C), 128.4 (2C), 122.8, 116.9, 80.4, 66.2, 63.6, 58.4, 54.2, 52.7, 46.0, 45.3, 28.3 (3C). **HRMS** (ESI-TOF) calcd for  $[C_{20}H_{24}^{79}BrN_3O_4+H]^+$ : 450.1023, found: 450.1027,  $[C_{20}H_{24}^{81}BrN_3O_4+H]^+$ : 452.1002, found: 452.1006; **HPLC** (Chiralpak AD-H, *n*-hexane/*i*-propanol = 80/20, 1.0 mL/min, 220 nm)  $t_R$  = 10.99 min, 17.97 min.

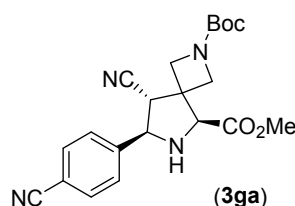

**2-(tert-Butyl) 5-methyl (5S,7R,8R)-8-cyano-7-(4-cyanophenyl)-2,6-diazaspiro[3.4]octane-2,5-dicarboxylate** White solid, yield: 97%; m.p.: 164-166°C;  $[\alpha]_D^{25} = +185.3(c\ 1.00, CH_2Cl_2)$ ; **<sup>1</sup>H NMR** (400 MHz, CDCl<sub>3</sub>)  $\delta$  7.68 (s, 4H), 4.62 (d,  $J = 7.2$  Hz, 1H, minor), 4.46 (d,  $J = 9.3$  Hz, 1H), 4.29 (d,  $J = 9.1$  Hz, 1H), 4.18 (s, 1H), 4.05 (d,  $J = 9.2$  Hz, 1H), 3.96 – 3.85 (m, 2H), 3.84 (s, 3H), 3.55 (d,  $J = 7.2$  Hz, 1H, minor), 3.28 (d,  $J = 9.3$  Hz, 1H), 2.66 (brs, 1H), 1.45 (s, 9H). **<sup>13</sup>C NMR** (100 MHz, CDCl<sub>3</sub>)  $\delta$  172.3, 155.7, 144.7, 132.7 (2C), 127.5 (2C), 118.4, 116.6, 112.6, 80.5, 66.0, 63.4, 58.2, 53.9, 52.7, 45.7, 45.3, 28.3 (3C). **HRMS** (ESI-TOF) calcd for  $[C_{21}H_{24}N_4O_4+H]^+$ : 397.1870, found: 397.1874; **HPLC** (Chiralpak AD-H, *n*-hexane/*i*-propanol = 80/20, 1.0 mL/min, 220 nm)  $t_R$  = 14.13 min, 25.44 min.

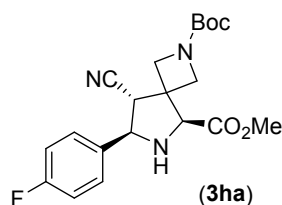

**2-(tert-Butyl) 5-methyl (5S,7R,8R)-8-cyano-7-(4-fluorophenyl)-2,6-diazaspiro[3.4]octane-2,5-dicarboxylate** White solid, yield: 96%; m.p.: 151-153 °C;  $[\alpha]_D^{25} = +162.5(c\ 1.00, CH_2Cl_2)$ ; **<sup>1</sup>H NMR** (400 MHz, CDCl<sub>3</sub>)  $\delta$  7.54 – 7.44 (m, 2H), 7.14 – 6.95 (m, 2H), 4.52 (d,  $J = 7.0$  Hz, 1H, minor), 4.35 (d,  $J = 9.4$  Hz, 1H), 4.30 (d,  $J = 9.2$  Hz, 1H), 4.12 (s, 1H), 4.06 (d,  $J = 9.2$  Hz, 1H), 3.95 (d,  $J = 9.7$  Hz, 1H), 3.87 (d,  $J = 9.1$  Hz, 1H), 3.83 (s, 3H), 3.47 (d,  $J = 7.0$  Hz, 1H, minor), 3.22 (d,  $J = 9.3$  Hz, 1H), 2.54 (brs,

1H), 1.46 (s, 9H). <sup>13</sup>C NMR (100 MHz, CDCl<sub>3</sub>) δ 172.5, 162.9 (d, *J* = 247.4 Hz), 155.8, 134.6, 128.4 (d, *J* = 8.2 Hz, 2C), 117.0, 115.9 (d, *J* = 21.6 Hz, 2C), 80.4, 66.2, 63.5, 58.4, 54.3, 52.6, 46.1, 45.2, 28.3 (3C). **HRMS** (ESI-TOF) calcd for [C<sub>20</sub>H<sub>24</sub>FN<sub>3</sub>O<sub>4</sub>+H]<sup>+</sup>: 390.1824, found: 390.1830; **HPLC** (Chiralpak AD-H, *n*-hexane/*i*-propanol = 80/20, 1.0 mL/min, 220 nm) t<sub>R</sub> = 10.30 min, 16.31 min.

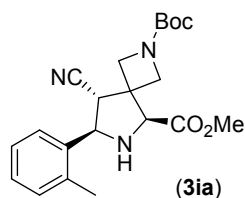

**2-(*tert*-Butyl) 5-methyl (5*S*,7*R*,8*R*)-8-cyano-7-(*o*-tolyl)-2,6-diazaspiro[3.4]octane-2,5-dicarboxylate**

White solid, yield: 97%; m.p.: 139-141 °C; [α]<sub>D</sub><sup>25</sup> = +153.6 (c 1.00, CH<sub>2</sub>Cl<sub>2</sub>); <sup>1</sup>H NMR (400 MHz, CDCl<sub>3</sub>) δ 7.66 (d, *J* = 7.5 Hz, 1H, minor), 7.60 (dd, *J* = 7.2, 1.9 Hz, 1H), 7.33 – 7.11 (m, 3H), 4.69 (d, *J* = 8.0 Hz, 1H), 4.29 (d, *J* = 9.2 Hz, 1H), 4.15 (d, *J* = 9.5 Hz, 1H), 4.13 (s, 1H), 4.06 (s, 2H, minor), 3.95 (d, *J* = 9.8 Hz, 1H), 3.88 (s, 3H, minor), 3.85 (s, 3H), 3.77 (d, *J* = 9.7 Hz, 1H), 3.52 (d, *J* = 7.1 Hz, 1H, minor), 3.23 (d, *J* = 8.0 Hz, 1H), 2.44 (s, 4H), 2.35 (s, 3H, minor), 1.45 (s, 9H). <sup>13</sup>C NMR (100 MHz, CDCl<sub>3</sub>) δ 172.1, 155.8, 137.1, 136.1, 130.9, 128.4, 126.9, 125.5, 117.6, 80.3, 66.2, 60.0, 57.4, 55.1, 52.7, 45.4, 45.2, 28.3 (3C), 19.5. **HRMS** (ESI-TOF) calcd for [C<sub>21</sub>H<sub>27</sub>N<sub>3</sub>O<sub>4</sub>+H]<sup>+</sup>: 386.2074, found: 386.2078; **HPLC** (Chiralpak AD-H, *n*-hexane/*i*-propanol = 80/20, 1.0 mL/min, 220 nm) t<sub>R</sub> = 8.90 min, 13.61 min.

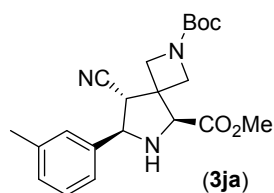

**2-(*tert*-Butyl) 5-methyl (5*S*,7*R*,8*R*)-8-cyano-7-(*m*-tolyl)-2,6-diazaspiro[3.4]octane-2,5-dicarboxylate**

White solid, yield: 97%; m.p.: 142-144 °C; [α]<sub>D</sub><sup>25</sup> = +174.5 (c 1.00, CH<sub>2</sub>Cl<sub>2</sub>); <sup>1</sup>H NMR (400 MHz, CDCl<sub>3</sub>) δ 7.33 – 7.23 (m, 3H), 7.20 – 7.13 (m, 1H), 4.47 (d, *J* = 6.8 Hz, 1H, minor), 4.31 (d, *J* = 9.0 Hz, 2H), 4.15 (d, *J* = 9.0 Hz, 1H, minor), 4.11 (s, 1H), 4.08 (d, *J* = 9.2 Hz, 1H), 3.96 (d, *J* = 9.7 Hz, 1H), 3.91 – 3.83 (m, 1H), 3.84 (s, 3H), 3.47 (d, *J* = 6.8 Hz, 1H, minor), 3.23 (d, *J* = 9.1 Hz, 1H), 2.37 (s, 3H), 1.46 (s, 9H). <sup>13</sup>C NMR (100 MHz, CDCl<sub>3</sub>) δ 172.3, 155.8, 138.7, 138.6, 129.5, 128.9, 127.3, 123.6, 117.2, 80.3, 66.4, 64.4, 58.2, 54.6, 52.6, 46.1, 45.3, 28.3 (3C), 21.4. **HRMS** (ESI-TOF) calcd for [C<sub>21</sub>H<sub>27</sub>N<sub>3</sub>O<sub>4</sub>+H]<sup>+</sup>: 386.2074, found: 386.2079; **HPLC** (Chiralpak AD-H, *n*-hexane/*i*-propanol = 80/20, 1.0 mL/min, 220 nm) t<sub>R</sub> = 9.27 min, 22.53 min.

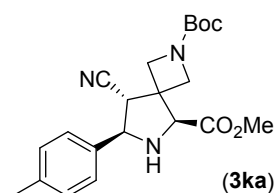

**2-(*tert*-Butyl) 5-methyl (5*S*,7*R*,8*R*)-8-cyano-7-(*p*-tolyl)-2,6-diazaspiro[3.4]octane-2,5-dicarboxylate**

White solid, yield: 97%; m.p.: 171-173 °C; [α]<sub>D</sub><sup>25</sup> = +192.7 (c 1.00, CH<sub>2</sub>Cl<sub>2</sub>); <sup>1</sup>H NMR (400 MHz, CDCl<sub>3</sub>) δ 7.36 (d, *J* = 7.9 Hz, 2H), 7.19 (d, *J* = 7.8 Hz, 2H), 4.48 (d, *J* = 6.9 Hz, 1H, minor), 4.31 (dd, *J* = 9.4, 2.6 Hz, 2H), 4.15 (d, *J* = 9.0 Hz, 1H, minor), 4.10 (s, 1H), 4.07 (d, *J* = 9.2 Hz, 1H), 4.02 (d, *J* = 6.2 Hz,

2H, minor), 3.95 (d,  $J = 9.7$  Hz, 1H), 3.90 – 3.85 (m, 1H), 3.83 (s, 3H), 3.46 (d,  $J = 6.8$  Hz, 1H, minor), 3.21 (d,  $J = 9.2$  Hz, 1H), 2.51 (brs, 1H), 2.35 (s, 3H), 1.45 (s, 9H).  $^{13}\text{C}$  NMR (100 MHz,  $\text{CDCl}_3$ )  $\delta$  172.4, 155.8, 138.7, 135.6, 129.7 (2C), 126.5 (2C), 117.2, 80.3, 66.5, 64.2, 57.9, 54.5, 52.6, 46.2, 45.3, 28.3 (3C), 21.2. **HRMS** (ESI-TOF) calcd for  $[\text{C}_{21}\text{H}_{27}\text{N}_3\text{O}_4+\text{H}]^+$ : 386.2074, found: 386.2079; **HPLC** (Chiralpak AD-H, *n*-hexane/*i*-propanol = 80/20, 1.0 mL/min, 220 nm)  $t_{\text{R}} = 9.56$  min, 11.74 min.

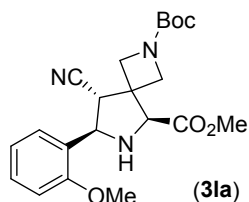

**2-(tert-Butyl) 5-methyl (5S,7R,8R)-8-cyano-7-(2-methoxyphenyl)-2,6-diazaspiro[3.4]octane-2,5-dicarboxylate** White solid, yield: 97%; m.p.: 145-147 °C;  $[\alpha]_{\text{D}}^{25} = +234.7$  (c 1.00,  $\text{CH}_2\text{Cl}_2$ );  $^1\text{H}$  NMR (400 MHz,  $\text{CDCl}_3$ )  $\delta$  7.49 (dd,  $J = 7.6, 1.7$  Hz, 1H), 7.36 – 7.26 (m, 1H), 7.02 – 6.93 (m, 1H), 6.90 (d,  $J = 8.2$  Hz, 1H), 4.73 (d,  $J = 7.5$  Hz, 1H, minor), 4.64 (d,  $J = 6.6$  Hz, 1H), 4.29 (d,  $J = 9.4$  Hz, 1H), 4.18 (d,  $J = 9.4$  Hz, 1H), 4.08 (s, 1H), 4.02 (d,  $J = 8.6$  Hz, 1H, minor), 3.89 – 3.78 (m, 7H), 3.62 (d,  $J = 9.7$  Hz, 1H), 3.36 (d,  $J = 6.7$  Hz, 1H), 2.86 (brs, 1H), 1.44 (s, 9H).  $^{13}\text{C}$  NMR (100 MHz,  $\text{CDCl}_3$ )  $\delta$  171.4, 156.8, 155.9, 129.7, 128.0, 126.6, 121.0, 118.5, 110.6, 80.2, 66.4, 61.1, 56.7, 55.3 (2C), 52.6, 45.6, 45.3, 28.3 (3C). **HRMS** (ESI-TOF) calcd for  $[\text{C}_{21}\text{H}_{27}\text{N}_3\text{O}_5+\text{H}]^+$ : 402.2023, found: 402.2027; **HPLC** (Chiralpak AD-H, *n*-hexane/*i*-propanol = 80/20, 1.0 mL/min, 220 nm)  $t_{\text{R}} = 12.22$  min, 27.45 min.

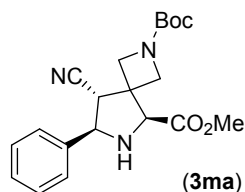

**2-(tert-Butyl) 5-methyl (5S,7R,8R)-8-cyano-7-phenyl-2,6-diazaspiro[3.4]octane-2,5-dicarboxylate** White solid, yield: 96%; m.p.: 154-156 °C;  $[\alpha]_{\text{D}}^{25} = +183.8$  (c 1.00,  $\text{CH}_2\text{Cl}_2$ );  $^1\text{H}$  NMR (400 MHz,  $\text{CDCl}_3$ )  $\delta$  7.53 – 7.46 (m, 2H), 7.45 – 7.32 (m, 3H), 4.52 (d,  $J = 6.4$  Hz, 1H, minor), 4.48 (s, 1H, minor), 4.36 (d,  $J = 9.2$  Hz, 1H), 4.31 (d,  $J = 9.2$  Hz, 1H), 4.12 (s, 1H), 4.08 (d,  $J = 9.2$  Hz, 1H), 3.96 (d,  $J = 9.7$  Hz, 1H), 3.91 – 3.83 (m, 1H), 3.84 (s, 3H), 3.49 (d,  $J = 6.9$  Hz, 1H, minor), 3.25 (d,  $J = 9.2$  Hz, 1H), 2.56 (brs, 1H), 1.46 (s, 9H).  $^{13}\text{C}$  NMR (100 MHz,  $\text{CDCl}_3$ )  $\delta$  172.4, 155.8, 138.7, 129.0 (2C), 128.8, 126.6 (2C), 117.2, 80.3, 66.4, 64.3, 58.0, 54.5, 52.6, 46.1, 45.3, 28.3 (3C). **HRMS** (ESI-TOF) calcd for  $[\text{C}_{20}\text{H}_{25}\text{N}_3\text{O}_4+\text{H}]^+$ : 372.1918.2074, found: 372.1922; **HPLC** (Chiralpak AD-H, *n*-hexane/*i*-propanol = 80/20, 1.0 mL/min, 220 nm)  $t_{\text{R}} = 9.35$  min, 16.26 min.

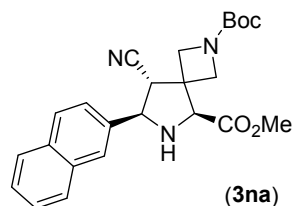

**2-(tert-Butyl) 5-methyl (5S,7R,8R)-8-cyano-7-(naphthalen-2-yl)-2,6-diazaspiro[3.4]octane-2,5-dicarboxylate** White solid, yield: 98%; m.p.: 158-160 °C;  $[\alpha]_{\text{D}}^{25} = +221.4$  (c 1.00,  $\text{CH}_2\text{Cl}_2$ );  $^1\text{H}$  NMR



(400 MHz, CDCl<sub>3</sub>)  $\delta$  7.96 – 7.90 (m, 1H), 7.91 – 7.80 (m, 3H), 7.61 (dd,  $J$  = 8.6, 1.8 Hz, 1H), 7.55 – 7.46 (m, 2H), 4.67 (d,  $J$  = 7.1 Hz, 1H, minor), 4.53 (d,  $J$  = 9.1 Hz, 1H), 4.35 (d,  $J$  = 9.1 Hz, 1H), 4.17 (s, 1H), 4.11 (d,  $J$  = 9.2 Hz, 1H), 4.10 – 4.02 (m, 2H, minor), 3.98 (d,  $J$  = 9.7 Hz, 1H), 3.94 – 3.87 (m, 1H), 3.87 (s, 3H), 3.56 (d,  $J$  = 6.9 Hz, 1H, minor), 3.35 (d,  $J$  = 9.1 Hz, 1H), 2.65 (brs, 1H), 1.46 (s, 9H). <sup>13</sup>C NMR (100 MHz, CDCl<sub>3</sub>)  $\delta$  172.4, 155.8, 136.0, 133.5, 133.2, 129.1, 128.1, 127.8, 126.6, 126.5, 126.2, 123.9, 117.2, 80.4, 66.4, 64.5, 58.2, 54.5, 52.7, 46.0, 45.3, 28.3 (3C). **HRMS** (ESI-TOF) calcd for [C<sub>24</sub>H<sub>27</sub>N<sub>3</sub>O<sub>4</sub>+H]<sup>+</sup>: 422.2074, found: 422.2078; **HPLC** (Chiralpak AD-H, *n*-hexane/*i*-propanol = 80/20, 1.0 mL/min, 220 nm)  $t_R$  = 14.71 min, 24.49 min.

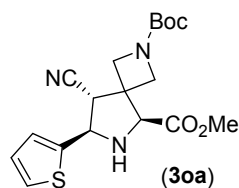

**2-(tert-Butyl) 5-methyl (5S,7R,8R)-8-cyano-7-(thiophen-2-yl)-2,6-diazaspiro[3.4]octane-2,5-dicarboxylate** White solid, yield: 97%; m.p.: 119-121 °C; [ $\alpha$ ]<sub>D</sub><sup>25</sup> = +173.5(*c* 1.00, CH<sub>2</sub>Cl<sub>2</sub>); <sup>1</sup>H NMR (400 MHz, CDCl<sub>3</sub>)  $\delta$  7.28 (dd,  $J$  = 5.2, 1.3 Hz, 1H), 7.15 (d,  $J$  = 3.5 Hz, 1H), 6.99 (dd,  $J$  = 5.1, 3.5 Hz, 1H), 4.78 (d,  $J$  = 7.2 Hz, 1H, minor), 4.68 (d,  $J$  = 8.6 Hz, 1H), 4.28 (d,  $J$  = 9.2 Hz, 1H), 4.17 (d,  $J$  = 9.0 Hz, 1H, minor), 4.09 (s, 1H), 4.06 (d,  $J$  = 9.3 Hz, 1H), 3.94 (d,  $J$  = 9.8 Hz, 1H), 3.91 – 3.84 (m, 1H), 3.83 (s, 3H), 3.50 (d,  $J$  = 7.1 Hz, 1H, minor), 3.34 (d,  $J$  = 8.6 Hz, 1H), 2.71 (brs, 1H), 1.45 (s, 9H). <sup>13</sup>C NMR (100 MHz, CDCl<sub>3</sub>)  $\delta$  171.8, 155.8, 143.1, 127.3, 125.7, 125.3, 117.0, 80.4, 66.2, 60.0, 57.6, 54.6, 52.6, 46.7, 45.2, 28.3 (3C). **HRMS** (ESI-TOF) calcd for [C<sub>18</sub>H<sub>23</sub>N<sub>3</sub>O<sub>4</sub>S+H]<sup>+</sup>: 378.1482, found: 378.1486; **HPLC** (Chiralpak AD-H, *n*-hexane/*i*-propanol = 80/20, 1.0 mL/min, 220 nm)  $t_R$  = 10.98 min, 26.59 min.

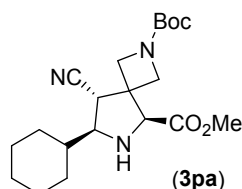

**2-(tert-Butyl) 5-methyl (5S,7S,8R)-8-cyano-7-cyclohexyl-2,6-diazaspiro[3.4]octane-2,5-dicarboxylate** White solid, yield: 92%; m.p.: 132-134°C; [ $\alpha$ ]<sub>D</sub><sup>25</sup> = +138.5(*c* 1.00, CH<sub>2</sub>Cl<sub>2</sub>); <sup>1</sup>H NMR (400 MHz, CDCl<sub>3</sub>)  $\delta$  4.24 (d,  $J$  = 9.2 Hz, 1H), 4.01 (d,  $J$  = 9.3 Hz, 1H), 3.92 – 3.85 (m, 2H), 3.86 – 3.79 (m, 1H), 3.79 (s, 3H), 3.13 – 3.04 (m, 1H), 2.97 (d,  $J$  = 8.6 Hz, 1H), 2.17 (s, 1H), 1.86 – 1.65 (m, 6H), 1.45 (s, 9H), 1.32 – 1.01 (m, 5H). <sup>13</sup>C NMR (100 MHz, CDCl<sub>3</sub>)  $\delta$  171.8, 155.8, 118.5, 80.2, 66.4, 66.3, 57.4, 55.4, 52.5, 45.2, 42.5, 41.2, 29.9, 29.7, 28.3 (3C), 26.1, 25.8, 25.7. **HRMS** (ESI-TOF) calcd for [C<sub>20</sub>H<sub>31</sub>N<sub>3</sub>O<sub>4</sub>+H]<sup>+</sup>: 378.2387, found: 378.2391; **HPLC** (Chiralpak AD-H, *n*-hexane/*i*-propanol = 80/20, 1.0 mL/min, 220 nm)  $t_R$  = 7.55 min, 9.55 min.

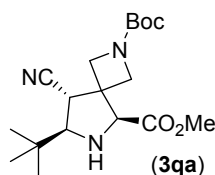

**2-(*tert*-Butyl) 5-methyl (5*S*,7*R*,8*R*)-7-(*tert*-butyl)-8-cyano-2,6-diazaspiro[3.4]octane-2,5-dicarboxylate** White solid, yield: 91%; m.p.: 142-144 °C;  $[\alpha]_D^{25} = +178.6$  (*c* 1.00, CH<sub>2</sub>Cl<sub>2</sub>); <sup>1</sup>H NMR (400 MHz, CDCl<sub>3</sub>) δ 4.24 (d, *J* = 9.4 Hz, 1H), 4.05 (d, *J* = 9.3 Hz, 1H), 3.88 (s, 1H), 3.86 – 3.80 (m, 2H), 3.78 (s, 3H), 3.16 (d, *J* = 8.2 Hz, 1H), 3.03 (d, *J* = 8.3 Hz, 1H), 2.23 (s, 1H), 1.44 (s, 9H), 0.97 (s, 9H). <sup>13</sup>C NMR (100 MHz, CDCl<sub>3</sub>) δ 171.1, 155.8, 119.0, 80.1, 70.4, 65.9, 56.5, 56.1, 52.4, 45.0, 39.0, 33.6, 28.3 (3C), 26.1 (3C). **HRMS** (ESI-TOF) calcd for [C<sub>18</sub>H<sub>29</sub>N<sub>3</sub>O<sub>4</sub>+H]<sup>+</sup>: 352.2231, found: 352.2236; **HPLC** (Chiralpak AD-H, *n*-hexane/*i*-propanol = 80/20, 1.0 mL/min, 220 nm) *t*<sub>R</sub> = 8.78 min, 9.36 min.

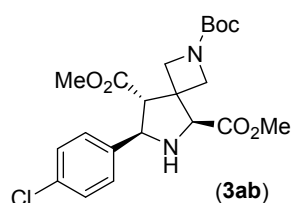

**2-(*tert*-Butyl) 5,8-dimethyl (5*S*,7*R*,8*R*)-7-(4-chlorophenyl)-2,6-diazaspiro[3.4]octane-2,5,8-tricarboxylate** White solid, yield: 94%; m.p.: 153-155 °C;  $[\alpha]_D^{25} = +156.4$  (*c* 1.00, CH<sub>2</sub>Cl<sub>2</sub>); <sup>1</sup>H NMR (400 MHz, CDCl<sub>3</sub>) δ 7.41 (d, *J* = 8.3 Hz, 2H), 7.29 (d, *J* = 8.5 Hz, 2H), 4.48 (d, *J* = 7.9 Hz, 1H), 4.13 (s, 1H), 4.08 (d, *J* = 8.3 Hz, 1H, minor), 4.06 – 3.94 (m, 2H), 3.94 – 3.84 (m, 2H), 3.83 (s, 3H), 3.73 (s, 3H), 3.41 (d, *J* = 6.8 Hz, 1H, minor), 3.34 (s, 2H, minor), 3.12 (d, *J* = 8.0 Hz, 1H), 2.46 (brs, 1H), 1.43 (s, 9H). <sup>13</sup>C NMR (100 MHz, CDCl<sub>3</sub>) δ (minor + major) 172.6, 171.8, 171.5, 170.6, 156.0, 140.1, 133.6, 128.8, 128.6, 128.3, 127.9, 79.9, 68.6, 67.3, 63.2, 62.6, 59.2, 57.2, 55.4, 52.5, 52.4, 52.3, 51.5, 45.5, 28.3 (3C). **HRMS** (ESI-TOF) calcd for [C<sub>21</sub>H<sub>27</sub>ClN<sub>2</sub>O<sub>6</sub>+H]<sup>+</sup>: 439.1630, found: 439.1634; **HPLC** (Chiralpak AD-H, *n*-hexane/*i*-propanol = 80/20, 1.0 mL/min, 220 nm) *t*<sub>R</sub> = 28.26 min, 32.83 min.

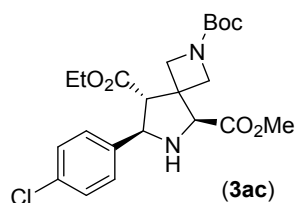

**2-(*tert*-Butyl) 8-ethyl 5-methyl (5*S*,7*R*,8*R*)-7-(4-chlorophenyl)-2,6-diazaspiro[3.4]octane-2,5,8-tricarboxylate** White solid, yield: 99%; m.p.: 156-158 °C;  $[\alpha]_D^{25} = +164.4$  (*c* 1.00, CH<sub>2</sub>Cl<sub>2</sub>); <sup>1</sup>H NMR (400 MHz, CDCl<sub>3</sub>) δ 7.42 (d, *J* = 8.1 Hz, 2H), 7.30 (d, *J* = 6.7 Hz, 2H), 4.48 (d, *J* = 7.9 Hz, 1H), 4.29 – 4.19 (m, 1H), 4.17 – 4.05 (m, 2H), 4.07 – 3.94 (m, 2H), 3.93 – 3.85 (m, 2H), 3.83 (s, 3H), 3.39 (d, *J* = 6.7 Hz, 1H, minor), 3.10 (d, *J* = 8.2 Hz, 1H), 2.44 (brs, 1H), 1.42 (s, 9H), 1.25 (t, *J* = 7.1 Hz, 3H). <sup>13</sup>C NMR (100 MHz, CDCl<sub>3</sub>) δ (minor + major) δ 172.8, 171.7, 170.9, 170.2, 156.1, 155.9, 140.2, 133.6, 133.5, 128.8 (2C), 128.5, 128.4 (2C), 128.0, 79.9, 79.8, 68.8, 67.4, 63.2, 62.5, 61.3, 60.7, 59.8, 59.0, 52.5, 52.4, 46.9, 45.5, 28.4 (3C), 28.4 (3C), 14.2, 13.8. **HRMS** (ESI-TOF) calcd for [C<sub>22</sub>H<sub>29</sub>ClN<sub>2</sub>O<sub>6</sub>+H]<sup>+</sup>: 453.1787, found: 453.1791; **HPLC** (Chiralpak AD-H, *n*-hexane/*i*-propanol = 80/20, 1.0 mL/min, 220 nm) *t*<sub>R</sub> = 14.30 min, 16.99 min.

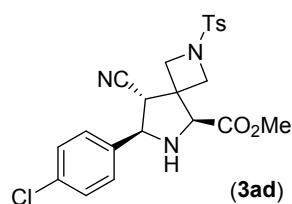

**Methyl (5*S*,7*R*,8*R*)-7-(4-chlorophenyl)-8-cyano-2-tosyl-2,6-diazaspiro[3.4]octane-5-carboxylate**

White solid, yield: 75%; m.p.: 173-175 °C;  $[\alpha]_{\text{D}}^{25} = +170.4$  ( $c$  1.00,  $\text{CH}_2\text{Cl}_2$ );  $^1\text{H NMR}$  (400 MHz,  $\text{CDCl}_3$ )  $\delta$  7.74 (d,  $J = 8.3$  Hz, 2H), 7.38 (dd,  $J = 8.5, 2.5$  Hz, 4H), 7.36 – 7.29 (m, 2H), 4.27 (d,  $J = 9.0$  Hz, 1H), 4.05 (s, 1H), 4.02 – 3.97 (m, 2H), 3.87 (d,  $J = 9.0$  Hz, 1H), 3.77 (s, 3H), 3.61 (d,  $J = 9.0$  Hz, 1H), 3.07 (d,  $J = 9.0$  Hz, 1H), 2.45 (s, 3H).  $^{13}\text{C NMR}$  (100 MHz,  $\text{CDCl}_3$ )  $\delta$  172.0, 144.9, 137.3, 134.6, 131.0, 130.0 (2C), 129.1 (2C), 128.3 (2C), 127.9 (2C), 116.4, 65.6, 63.4, 58.2, 55.2, 52.7, 45.5, 44.7, 21.6. **HRMS** (ESI-TOF) calcd for  $[\text{C}_{22}\text{H}_{22}\text{ClN}_3\text{O}_4\text{S}+\text{H}]^+$ : 460.1092, found: 460.1096; **HPLC** (Chiralpak AD-H,  $n$ -hexane/ $i$ -propanol = 80/20, 1.0 mL/min, 220 nm)  $t_{\text{R}} = 17.85$  min, 21.31 min.

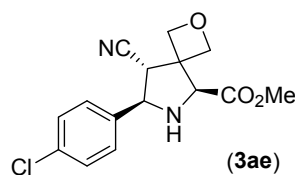

**Methyl (5*S*,7*R*,8*R*)-7-(4-chlorophenyl)-8-cyano-2-oxa-6-azaspiro[3.4]octane-5-carboxylate**

White solid, yield: 86%; m.p.: 144-146 °C;  $[\alpha]_{\text{D}}^{25} = +188.0$  ( $c$  1.00,  $\text{CH}_2\text{Cl}_2$ );  $^1\text{H NMR}$  (400 MHz,  $\text{CDCl}_3$ )  $\delta$  7.49 – 7.40 (m, 2H), 7.38 – 7.30 (m, 2H), 5.00 (d,  $J = 6.8$  Hz, 1H), 4.79 (d,  $J = 6.9$  Hz, 1H), 4.67 (d,  $J = 7.5$  Hz, 1H), 4.59 (d,  $J = 7.5$  Hz, 1H), 4.29 (d,  $J = 9.4$  Hz, 1H), 4.24 (s, 1H), 3.85 (s, 3H), 3.21 (d,  $J = 9.4$  Hz, 1H), 2.55 (brs, 1H).  $^{13}\text{C NMR}$  (100 MHz,  $\text{CDCl}_3$ )  $\delta$  172.4, 137.3, 134.6, 129.2 (2C), 128.0 (2C), 117.1, 79.0, 75.5, 65.6, 63.5, 52.7, 50.8, 45.5. **HRMS** (ESI-TOF) calcd for  $[\text{C}_{15}\text{H}_{15}\text{ClN}_2\text{O}_3+\text{H}]^+$ : 307.0844, found: 307.0848; **HPLC** (Chiralpak AD-H,  $n$ -hexane/ $i$ -propanol = 80/20, 1.0 mL/min, 220 nm)  $t_{\text{R}} = 31.21$  min, 37.76 min.

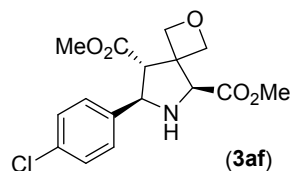

**Dimethyl (5*S*,7*R*,8*R*)-7-(4-chlorophenyl)-2-oxa-6-azaspiro[3.4]octane-5,8-dicarboxylate**

White solid, yield: 91%; m.p.: 154-156 °C;  $[\alpha]_{\text{D}}^{25} = +156.3$  ( $c$  1.00,  $\text{CH}_2\text{Cl}_2$ );  $^1\text{H NMR}$  (400 MHz,  $\text{CDCl}_3$ )  $\delta$  7.39 (d,  $J = 8.2$  Hz, 2H), 7.30 (d,  $J = 8.4$  Hz, 2H), 4.75 (d,  $J = 6.9$  Hz, 1H), 4.71 (d,  $J = 6.8$  Hz, 1H), 4.65 (d,  $J = 7.0$  Hz, 1H), 4.54 (d,  $J = 7.0$  Hz, 1H), 4.44 (d,  $J = 8.2$  Hz, 1H), 4.20 (s, 1H), 3.86 (s, 3H), 3.77 (s, 3H), 3.14 (d,  $J = 8.2$  Hz, 1H), 2.26 (brs, 1H).  $^{13}\text{C NMR}$  (100 MHz,  $\text{CDCl}_3$ )  $\delta$  172.7, 171.6, 139.9, 133.6, 128.8 (2C), 128.2 (2C), 78.1, 77.4, 66.7, 62.7, 58.8, 52.5, 52.4, 51.4. **HRMS** (ESI-TOF) calcd for  $[\text{C}_{16}\text{H}_{18}\text{ClN}_2\text{O}_5+\text{H}]^+$ : 340.0946, found: 340.0951; **HPLC** (Chiralpak AD-H,  $n$ -hexane/ $i$ -propanol = 80/20, 1.0 mL/min, 220 nm)  $t_{\text{R}} = 18.84$  min, 23.48 min.

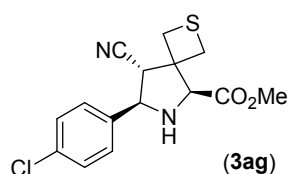

**Methyl (5*S*,7*R*,8*R*)-7-(4-chlorophenyl)-8-cyano-2-thia-6-azaspiro[3.4]octane-5-carboxylate**

White solid, yield: 93%; m.p.: 140-142 °C;  $[\alpha]_{\text{D}}^{25} = +163.4$  ( $c$  1.00,  $\text{CH}_2\text{Cl}_2$ );  $^1\text{H NMR}$  (400 MHz,  $\text{CDCl}_3$ )  $\delta$

7.48 (d,  $J = 8.5$  Hz, 2H), 7.35 (d,  $J = 8.5$  Hz, 2H), 4.38 (d,  $J = 9.3$  Hz, 1H), 4.27 (s, 1H), 4.13 (s, 1H, minor), 3.85 (s, 3H), 3.67 (d,  $J = 9.8$  Hz, 1H), 3.49 – 3.39 (m, 2H, minor), 3.31 – 3.21 (m, 2H), 3.17 (dd,  $J = 9.8, 6.3$  Hz, 2H), 2.54 (brs, 1H).  $^{13}\text{C}$  NMR (100 MHz,  $\text{CDCl}_3$ )  $\delta$  172.7, 137.8, 134.5, 129.1 (2C), 128.2 (2C), 117.4, 67.9, 62.9, 55.0, 52.6, 47.9, 34.1, 30.5. **HRMS** (ESI-TOF) calcd for  $[\text{C}_{15}\text{H}_{15}\text{ClN}_2\text{O}_2\text{S}+\text{H}]^+$ : 323.0616, found: 323.0620; **HPLC** (Chiralpak AD-H, *n*-hexane/*i*-propanol = 80/20, 1.0 mL/min, 220 nm)  $t_{\text{R}} = 23.89$  min, 27.14 min.

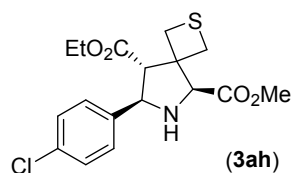

**8-Ethyl 5-methyl (5S,7R,8R)-7-(4-chlorophenyl)-2-thia-6-azaspiro[3.4]octane-5,8-dicarboxylate**  
White solid, yield: 93%; m.p.: 148-150 °C;  $[\alpha]_{\text{D}}^{25} = +136.4$  ( $c$  1.00,  $\text{CH}_2\text{Cl}_2$ );  $^1\text{H}$  NMR (400 MHz,  $\text{CDCl}_3$ )  $\delta$  7.45 (d,  $J = 8.5$  Hz, 2H), 7.29 (d,  $J = 8.5$  Hz, 2H), 4.51 (d,  $J = 9.1$  Hz, 1H), 4.32 – 4.16 (m, 2H), 4.16 (s, 1H), 3.84 (s, 3H), 3.48 (d,  $J = 9.8$  Hz, 1H), 3.36 (d,  $J = 9.9$  Hz, 1H), 3.26 (d,  $J = 9.8$  Hz, 1H), 3.21 (d,  $J = 9.9$  Hz, 1H), 3.05 (d,  $J = 9.2$  Hz, 1H), 2.36 (brs, 1H), 1.29 (t,  $J = 7.1$  Hz, 3H).  $^{13}\text{C}$  NMR (100 MHz,  $\text{CDCl}_3$ )  $\delta$  173.1, 170.9, 140.2, 133.4, 128.7 (2C), 128.5 (2C), 69.3, 62.0, 61.4, 59.9, 56.0, 52.3, 33.5, 31.4, 14.2. **HRMS** (ESI-TOF) calcd for  $[\text{C}_{17}\text{H}_{20}\text{ClNO}_4\text{S}+\text{H}]^+$ : 370.0880, found: 370.0884; **HPLC** (Chiralpak AD-H, *n*-hexane/*i*-propanol = 80/20, 1.0 mL/min, 220 nm)  $t_{\text{R}} = 14.03$  min, 15.88 min.

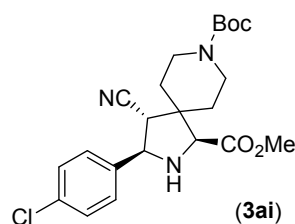

**8-(tert-Butyl) 1-methyl (1S,3R,4R)-3-(4-chlorophenyl)-4-cyano-2,8-diazaspiro[4.5]decane-1,8-dicarboxylate**  
White solid, yield: 86%; m.p.: 168-170 °C;  $[\alpha]_{\text{D}}^{25} = +157.5$  ( $c$  1.00,  $\text{CH}_2\text{Cl}_2$ );  $^1\text{H}$  NMR (400 MHz,  $\text{CDCl}_3$ )  $\delta$  7.58 (d,  $J = 8.5$  Hz, 2H), 7.36 (d,  $J = 8.5$  Hz, 2H), 4.49 (d,  $J = 10.1$  Hz, 1H), 4.02 (s, 2H), 3.79 (s, 3H), 3.77 – 3.66 (m, 1H), 3.34 – 3.09 (m, 2H), 3.00 (d,  $J = 10.1$  Hz, 1H), 2.52 (s, 1H), 2.01 – 1.65 (m, 4H), 1.47 (s, 9H).  $^{13}\text{C}$  NMR (100 MHz,  $\text{CDCl}_3$ )  $\delta$  173.6, 154.6, 138.4, 134.3, 129.0 (2C), 128.4 (2C), 117.7, 80.1, 65.0, 63.3, 52.2, 48.4, 47.7, 40.6, 39.9, 31.5, 31.3, 28.4 (3C). **HRMS** (ESI-TOF) calcd for  $[\text{C}_{22}\text{H}_{28}\text{ClN}_3\text{O}_4+\text{H}]^+$ : 434.1841, found: 434.1846; **HPLC** (Chiralpak AD-H, *n*-hexane/*i*-propanol = 80/20, 1.0 mL/min, 220 nm)  $t_{\text{R}} = 8.05$  min, 11.87 min.

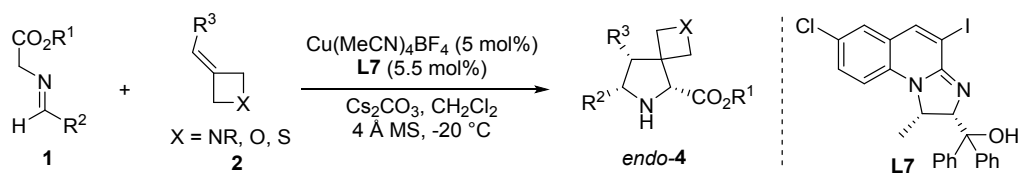

At a nitrogen atmosphere,  $\text{Cu}(\text{CH}_3\text{CN})_4\text{BF}_4$  (3.1 mg, 0.01 mmol),  $\text{Cs}_2\text{CO}_3$  (65.2 mg, 0.2 mmol) and **L7** (5.8 mg, 0.011 mmol) were dissolved in 2.0 mL dry  $\text{CH}_2\text{Cl}_2$ , subsequently add 4 Å Ms (100 mg), and stirred at room temperature for about 1-2 h. Then, iminoester **1** (0.24 mmol) were added, the mixture was

cooled to  $-20\text{ }^{\circ}\text{C}$  and alkene **2** (0.2 mmol) was added. Once starting material was consumed (monitored by TLC), the mixture was concentrated and the residue was purified by column chromatography (petroleum ether/ethyl acetate 6:1 to 2:1) on silica gel to afford the corresponding product **4**.

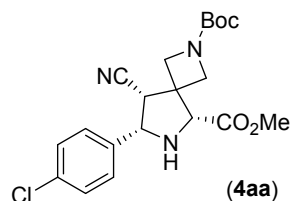

**2-(tert-Butyl) 5-methyl (5R,7S,8R)-7-(4-chlorophenyl)-8-cyano-2,6-diazaspiro[3.4]octane-2,5-dicarboxylate** White solid, yield: 88%; m.p.:  $176\text{--}178\text{ }^{\circ}\text{C}$ ;  $[\alpha]_{\text{D}}^{25} = +175.3$  ( $c$  1.00,  $\text{CH}_2\text{Cl}_2$ );  $^1\text{H NMR}$  (400 MHz,  $\text{CDCl}_3$ )  $\delta$  7.44 – 7.32 (m, 4H), 4.51 (d,  $J = 6.9$  Hz, 1H), 4.16 (d,  $J = 8.9$  Hz, 1H), 4.05 – 3.92 (m, 4H), 3.88 (s, 3H), 3.48 (d,  $J = 6.9$  Hz, 1H), 2.69 (s, 1H), 1.44 (s, 9H).  $^{13}\text{C NMR}$  (100 MHz,  $\text{CDCl}_3$ )  $\delta$  171.3, 155.9, 136.3, 134.6, 129.0 (2C), 128.4 (2C), 116.0, 80.4, 66.1, 61.2, 58.5, 54.6, 52.8, 46.4, 45.3, 28.3 (3C). **HRMS** (ESI-TOF) calcd for  $[\text{C}_{20}\text{H}_{24}\text{ClN}_3\text{O}_4+\text{H}]^+$ : 406.1528, found: 450.1533; **HPLC** (Chiralpak AD-H,  $n$ -hexane/ethanol = 80/20, 0.8 mL/min, 220 nm)  $t_{\text{R}} = 15.81$  min, 19.45 min.

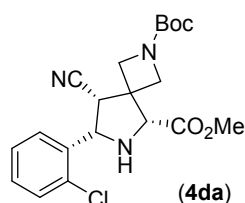

**2-(tert-Butyl) 5-methyl (5R,7S,8R)-7-(2-chlorophenyl)-8-cyano-2,6-diazaspiro[3.4]octane-2,5-dicarboxylate** White solid, yield: 91%; m.p.:  $167\text{--}169\text{ }^{\circ}\text{C}$ ;  $[\alpha]_{\text{D}}^{25} = +216.2$  ( $c$  1.00,  $\text{CH}_2\text{Cl}_2$ );  $^1\text{H NMR}$  (400 MHz,  $\text{CDCl}_3$ )  $\delta$  7.82 (dd,  $J = 7.6$ , 1.8 Hz, 1H), 7.44 – 7.34 (m, 2H), 7.33 – 7.27 (m, 1H), 4.88 (d,  $J = 7.0$  Hz, 1H), 4.17 (d,  $J = 8.8$  Hz, 1H), 4.07 (s, 2H), 4.02 (s, 1H), 3.96 (d,  $J = 8.9$  Hz, 1H), 3.87 (s, 3H), 3.74 (d,  $J = 7.0$  Hz, 1H), 2.61 (brs, 1H), 1.45 (s, 9H).  $^{13}\text{C NMR}$  (100 MHz,  $\text{CDCl}_3$ )  $\delta$  171.1, 155.9, 135.3, 132.9, 129.8, 129.5, 128.0, 127.4, 115.9, 80.3, 65.7, 59.0, 58.1, 54.7, 52.7, 45.2, 44.8, 28.3 (3C). **HRMS** (ESI-TOF) calcd for  $[\text{C}_{20}\text{H}_{24}\text{ClN}_3\text{O}_4+\text{H}]^+$ : 406.1528, found: 406.1533; **HPLC** (Chiralpak AD-H,  $n$ -hexane/ethanol = 80/20, 0.8 mL/min, 220 nm)  $t_{\text{R}} = 14.22$  min, 15.82 min.

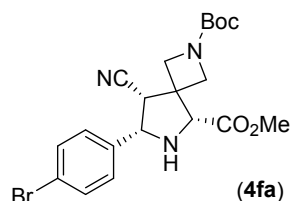

**2-(tert-Butyl) 5-methyl (5R,7S,8R)-7-(4-bromophenyl)-8-cyano-2,6-diazaspiro[3.4]octane-2,5-dicarboxylate** White solid, yield: 80%; m.p.:  $156\text{--}158\text{ }^{\circ}\text{C}$ ;  $[\alpha]_{\text{D}}^{25} = +153.4$  ( $c$  1.00,  $\text{CH}_2\text{Cl}_2$ );  $^1\text{H NMR}$  (400 MHz,  $\text{CDCl}_3$ )  $\delta$  7.53 (d,  $J = 8.5$  Hz, 2H), 7.35 (d,  $J = 8.5$  Hz, 2H), 4.49 (d,  $J = 7.0$  Hz, 1H), 4.15 (d,  $J = 8.9$  Hz, 1H), 4.05 – 3.95 (m, 3H), 3.94 (d,  $J = 8.9$  Hz, 1H), 3.88 (s, 3H), 3.48 (d,  $J = 7.0$  Hz, 1H), 2.69 (s, 1H), 1.44 (s, 9H).  $^{13}\text{C NMR}$  (100 MHz,  $\text{CDCl}_3$ )  $\delta$  171.3, 155.9, 136.9, 132.0 (2C), 128.7 (2C), 122.8, 116.0, 80.4, 66.1, 61.2, 58.5, 54.7, 52.8, 46.3, 45.2, 28.3 (3C). **HRMS** (ESI-TOF) calcd for  $[\text{C}_{20}\text{H}_{24}^{79}\text{BrN}_3\text{O}_4+\text{H}]^+$ : 450.1023, found: 450.1027; for  $[\text{C}_{20}\text{H}_{24}^{81}\text{BrN}_3\text{O}_4+\text{H}]^+$ : 452.1002, found:

452.1006; **HPLC** (Chiralpak AD-H, *n*-hexane/ethanol= 80/20, 0.8 mL/min, 220 nm)  $t_R$  = 17.61 min, 21.48 min.

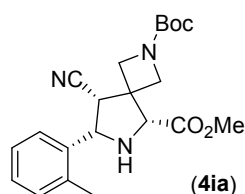

**2-(tert-Butyl) 5-methyl (5R,7S,8R)-8-cyano-7-(o-tolyl)-2,6-diazaspiro[3.4]octane-2,5-dicarboxylate** White solid, yield: 85%; m.p.: 151-153 °C;  $[\alpha]_D^{25} = +152.8$  (c 1.00, CH<sub>2</sub>Cl<sub>2</sub>); **<sup>1</sup>H NMR** (400 MHz, CDCl<sub>3</sub>)  $\delta$  7.71 – 7.63 (m, 1H), 7.35 – 7.25 (m, 1H), 7.28 – 7.16 (m, 2H), 4.72 (d,  $J$  = 7.2 Hz, 1H), 4.29 (d,  $J$  = 9.5 Hz, 1H, minor), 4.19 (d,  $J$  = 8.9 Hz, 1H), 4.13 (s, 1H, minor), 4.06 (s, 2H), 3.99 (s, 1H), 3.94 (d,  $J$  = 8.9 Hz, 1H), 3.88 (s, 3H), 3.85 (s, 3H, minor), 3.52 (d,  $J$  = 7.2 Hz, 1H), 3.23 (d,  $J$  = 8.1 Hz, 1H, minor), 2.64 (brs, 1H), 2.44 (s, 3H, minor), 2.34 (s, 3H), 1.45 (s, 9H). **<sup>13</sup>C NMR** (100 MHz, CDCl<sub>3</sub>)  $\delta$  171.2, 156.0, 135.8, 135.3, 130.7, 128.4, 126.7, 125.8, 116.1, 80.3, 66.0, 58.4, 57.9, 55.1, 52.7, 45.4, 45.2, 28.3 (3C), 19.6. **HRMS** (ESI-TOF) calcd for [C<sub>21</sub>H<sub>27</sub>N<sub>3</sub>O<sub>4</sub>+H]<sup>+</sup>: 386.2074, found: 386.2078; **HPLC** (Chiralpak AD-H, *n*-hexane/ethanol= 80/20, 0.8 mL/min, 220 nm)  $t_R$  = 14.43 min, 19.30 min.

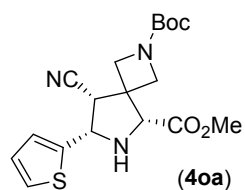

**2-(tert-Butyl) 5-methyl (5R,7S,8R)-8-cyano-7-(thiophen-2-yl)-2,6-diazaspiro[3.4]octane-2,5-dicarboxylate** White solid, yield: 78%; m.p.: 151-153 °C;  $[\alpha]_D^{25} = +152.8$  (c 1.00, CH<sub>2</sub>Cl<sub>2</sub>); **<sup>1</sup>H NMR** (400 MHz, CDCl<sub>3</sub>)  $\delta$  7.31 (d,  $J$  = 5.1 Hz, 1H), 7.18 – 7.11 (m, 1H), 7.08 – 6.99 (m, 1H), 4.79 (d,  $J$  = 7.0 Hz, 1H), 4.17 (d,  $J$  = 9.0 Hz, 1H), 4.08 – 3.92 (m, 4H), 3.87 (s, 3H), 3.51 (d,  $J$  = 6.9 Hz, 1H), 2.61 (brs, 1H), 1.44 (s, 9H). **<sup>13</sup>C NMR** (100 MHz, CDCl<sub>3</sub>)  $\delta$  170.8, 155.9, 142.0, 127.4, 125.8, 125.5, 115.9, 80.3, 66.1, 57.6, 57.4, 54.8, 52.8, 46.6, 45.1, 28.3 (3C). **HRMS** (ESI-TOF) calcd for [C<sub>18</sub>H<sub>23</sub>N<sub>3</sub>O<sub>4</sub>S+H]<sup>+</sup>: 378.1482, found: 378.1487; **HPLC** (Chiralpak AD-H, *n*-hexane/ethanol= 80/20, 0.8 mL/min, 220 nm)  $t_R$  = 15.89 min, 22.61 min.

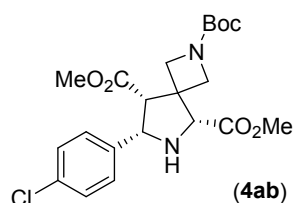

**2-(tert-Butyl) 5,8-dimethyl (5R,7S,8R)-7-(4-chlorophenyl)-2,6-diazaspiro[3.4]octane-2,5,8-tricarboxylate** White solid, yield: 87%; m.p.: 163-165 °C;  $[\alpha]_D^{25} = +155.9$  (c 1.00, CH<sub>2</sub>Cl<sub>2</sub>); **<sup>1</sup>H NMR** (400 MHz, CDCl<sub>3</sub>)  $\delta$  7.34 – 7.25 (m, 4H), 4.48 (d,  $J$  = 6.8 Hz, 1H), 4.15 – 4.05 (m, 2H), 4.02 (d,  $J$  = 8.8 Hz, 1H), 3.97 (s, 1H), 3.88 (s, 3H), 3.84 – 3.77 (m, 1H), 3.73 (s, 3H, minor), 3.41 (d,  $J$  = 6.8 Hz, 1H), 3.34 (s, 3H), 3.13 (d,  $J$  = 7.8 Hz, 1H, minor), 1.45 (s, 9H). **<sup>13</sup>C NMR** (100 MHz, CDCl<sub>3</sub>)  $\delta$  171.8, 170.7, 156.1, 136.6, 133.6, 128.6 (2C), 127.9 (2C), 79.9, 68.6, 63.2, 61.5, 59.7, 54.5, 52.5, 51.6, 46.7, 28.4 (3C).

**HRMS** (ESI-TOF) calcd for  $[C_{21}H_{27}ClN_2O_6+H]^+$ : 439.1630, found: 439.1634; **HPLC** (Chiralpak AD-H, *n*-hexane/*i*-propanol = 90/10, 1.0 mL/min, 220 nm)  $t_R$  = 25.82 min, 28.76 min.

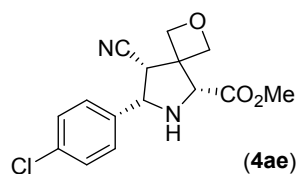

**Methyl (5R,7S,8R)-7-(4-chlorophenyl)-8-cyano-2-oxa-6-azaspiro[3.4]octane-5-carboxylate** White solid, yield: 85%; m.p.: 162-164 °C;  $[\alpha]_D^{25} = +187.6$  (*c* 1.00,  $CH_2Cl_2$ );  **$^1H$  NMR** (400 MHz,  $CDCl_3$ )  $\delta$  7.42 (d, *J* = 8.5 Hz, 2H), 7.38 (d, *J* = 8.4 Hz, 2H), 5.00 (d, *J* = 6.9 Hz, 1H, minor), 4.92 – 4.80 (m, 2H), 4.69 (d, *J* = 7.8 Hz, 1H), 4.60 (d, *J* = 6.6 Hz, 1H), 4.43 (d, *J* = 6.4 Hz, 1H), 4.25 (s, 1H, minor), 4.07 (s, 1H), 3.90 (s, 3H), 3.61 (d, *J* = 6.4 Hz, 1H), 3.21 (d, *J* = 9.5 Hz, 1H, minor), 2.67 (brs, 1H).  **$^{13}C$  NMR** (100 MHz,  $CDCl_3$ )  $\delta$  171.5, 136.0, 134.7, 129.1 (2C), 128.4 (2C), 116.1, 80.2, 75.4, 65.4, 61.4, 52.9, 51.4, 46.2. **HRMS** (ESI-TOF) calcd for  $[C_{15}H_{15}ClN_2O_3+H]^+$ : 307.0844, found: 307.0848; **HPLC** (Chiralpak AD-H, *n*-hexane/*i*-propanol = 90/10, 1.0 mL/min, 220 nm)  $t_R$  = 41.67 min, 43.80 min.

## Gram scale procedure

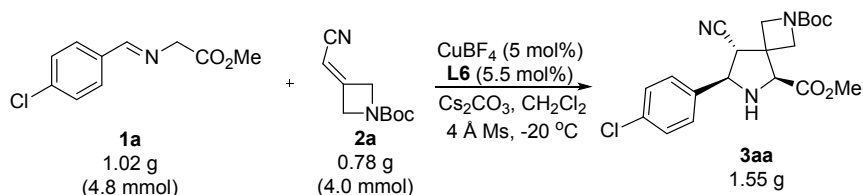

Under a nitrogen atmosphere,  $\text{Cu}(\text{CH}_3\text{CN})_4\text{BF}_4$  (62.9 mg, 0.20 mmol) and **L6** (115.6 mg, 0.22 mmol) were dissolved in dry  $\text{CH}_2\text{Cl}_2$  (40 mL), subsequently add 4 Å Ms (800 mg), and stirred at room temperature for about 1 h. Then, glycine imine **1a** (1.02 g, 4.8 mmol) and  $\text{Cs}_2\text{CO}_3$  (1.30 g, 4.0 mmol) were added, the mixture was cooled to  $-20^\circ\text{C}$  and alkene **2a** (0.78 g, 4.0 mmol) was added. Once starting material was consumed (monitored by TLC, about 2 h), the mixture was filtered through celite and the filtrate was concentrated, then the residue was purified by column chromatography (petroleum ether/ethyl acetate 4:1) on silica gel to afford the corresponding product **3aa** in 96% yield.

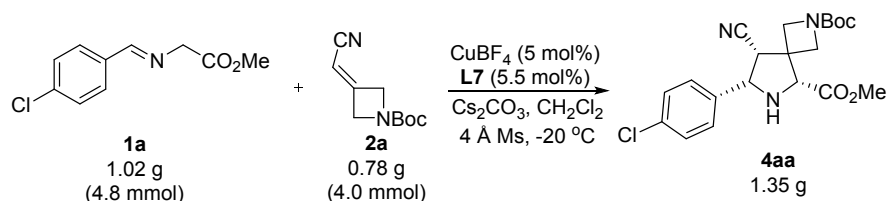

Under a nitrogen atmosphere,  $\text{Cu}(\text{CH}_3\text{CN})_4\text{BF}_4$  (62.9 mg, 0.20 mmol),  $\text{Cs}_2\text{CO}_3$  (1.30 g, 4.0 mmol) and **L7** (115.9 mg, 0.22 mmol) were dissolved in dry  $\text{CH}_2\text{Cl}_2$  (40 mL), subsequently add 4 Å Ms (800 mg), and stirred at room temperature for about 1 h. Then, the mixture was cooled to  $-20^\circ\text{C}$ , glycine imine **1a** (1.02 g, 4.8 mmol) and alkene **2a** (0.78 g, 4.0 mmol) was added. Once starting material was consumed (monitored by TLC, about 3.5 h), the mixture was filtered through celite and the filtrate was concentrated, then the residue was purified by column chromatography (petroleum ether/ethyl acetate 4:1) on silica gel to afford the corresponding product **4aa** in 83% yield.

## Synthetic transformations of the cycloadduct **3aa**

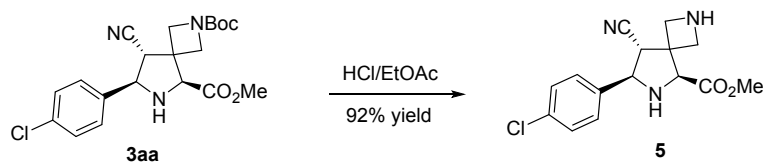

To a solution of **3aa** (40.6 mg, 0.1 mmol) in EtOAc (1 mL) was added hydrogen chloride (0.5 mL of a 4 M solution in EtOAc) and the mixture was stirred for 3 h, after which time the solvent was removed under reduced pressure. The crude product was purified by column chromatography ( $\text{CH}_2\text{Cl}_2/\text{MeOH}$  10:1) on silica gel to afford the corresponding product **5** in 92% yield.

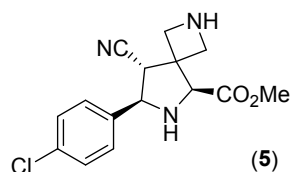



**Methyl (5*S*,7*R*,8*R*)-7-(4-chlorophenyl)-8-cyano-2,6-diazaspiro[3.4]octane-5-carboxylate** White solid, yield: 92%; m.p.: 121-123 °C;  $[\alpha]_D^{25} = +223.5$  (*c* 1.00, CH<sub>2</sub>Cl<sub>2</sub>); <sup>1</sup>H NMR (400 MHz, CDCl<sub>3</sub>) δ 7.48 (d, *J* = 8.2 Hz, 2H), 7.35 (d, *J* = 8.2 Hz, 2H), 4.30 (d, *J* = 9.9 Hz, 1H), 4.24 (s, 1H), 4.05 (dd, *J* = 8.5, 1.7 Hz, 1H), 3.82 (s, 3H), 3.75 – 3.64 (m, 2H), 3.61 (d, *J* = 9.0 Hz, 1H), 3.17 (d, *J* = 9.9 Hz, 1H), 2.12 (brs, 2H). <sup>13</sup>C NMR (100 MHz, CDCl<sub>3</sub>) δ 173.3, 137.7, 134.4, 129.1 (2C), 128.2 (2C), 117.8, 66.5, 63.5, 56.1, 52.5, 51.8, 50.9, 45.9. **HRMS** (ESI-TOF) calcd for [C<sub>15</sub>H<sub>16</sub>ClN<sub>3</sub>O<sub>2</sub>+H]<sup>+</sup>: 306.1004, found: 306.1007. **HPLC** (Chiralpak AD-H, *n*-hexane/ethanol = 70/30, 1.0 mL/min, 220 nm) *t*<sub>R</sub> = 9.12 min, 21.32 min.

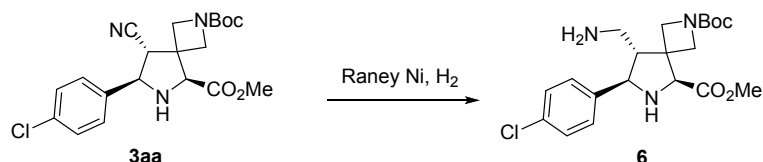

To a solution of **3aa** (40.6 mg, 0.1 mmol) in EtOH (1 mL) was added Raney Ni (8 mg) and the mixture was stirred at room temperature under H<sub>2</sub> atmosphere (bubble) for 4 h. The conversion was monitored by TLC. The resulting solution was filtered over Celite, and washed with EtOH and ethyl acetate. The solvent was removed under reduced pressure and the residue was purified by column chromatography (CH<sub>2</sub>Cl<sub>2</sub>/MeOH 10:1) to afford the desired product **6** in 89% yield.

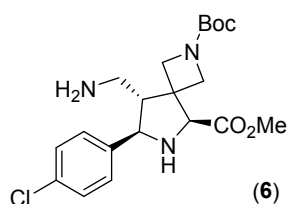

**2-(*tert*-Butyl) 5-methyl (5*S*,7*R*,8*S*)-8-(aminomethyl)-7-(4-chlorophenyl)-2,6-diazaspiro[3.4]octane-2,5-dicarboxylate** White solid, yield: 89%; m.p.: 155-157 °C;  $[\alpha]_D^{25} = +176.5$  (*c* 1.00, CH<sub>2</sub>Cl<sub>2</sub>); <sup>1</sup>H NMR (400 MHz, CDCl<sub>3</sub>) δ 7.80 (dd, *J* = 7.6, 1.9 Hz, 1H), 7.38 (dd, *J* = 7.7, 1.6 Hz, 1H), 7.33 – 7.22 (m, 2H), 4.98 (d, *J* = 5.3 Hz, 1H), 4.88 (d, *J* = 7.0 Hz, 1H, minor), 4.28 – 4.17 (m, 3H), 4.06 (s, 2H, minor), 4.02 (s, 1H, minor), 3.96 (d, *J* = 9.0 Hz, 1H, minor), 3.86 (s, 3H), 3.79 (d, *J* = 9.8 Hz, 1H), 3.74 (d, *J* = 7.1 Hz, 1H, minor), 3.46 (d, *J* = 9.8 Hz, 1H), 3.35 (d, *J* = 5.3 Hz, 1H), 2.61 (s, 1H), 1.42 (s, 9H). <sup>13</sup>C NMR (100 MHz, CDCl<sub>3</sub>) δ 173.4, 156.4, 141.2, 133.4, 128.9 (2C), 128.6 (2C), 79.9, 67.6, 64.8, 56.8, 55.9, 55.0, 52.3, 45.6, 40.5, 28.4 (3C). **HRMS** (ESI-TOF) calcd for [C<sub>20</sub>H<sub>28</sub>ClN<sub>3</sub>O<sub>4</sub>+H]<sup>+</sup>: 410.1841, found: 410.1845. **HPLC** (Chiralpak AD-H, *n*-hexane/ethanol = 85/15, 1.0 mL/min, 220 nm) *t*<sub>R</sub> = 35.65 min, 37.76 min.

## Proposed transition states of the diastereodivergent asymmetric 1,3-dipolar cycloaddition

The diastereodivergent observed in this asymmetric 1,3-DC cycloaddition can be rationalized by the proposed transition state shown in Figure S1. With the ferrocene *P,N*-ligands **L6**, the *in situ*-formed azomethine ylide is coordinated to the metallic center and oriented in such way because of the steric repulsion between the phenyl group of the ylide and the phenyl ring on the phosphorus atom of the chiral ligand, and the highly steric congestion formation by the cyanogroup leads the dipolarophile (**2a**) approach azomethine ylide through *Re* (C=N) face attack and forms the *exo*-(5*S*,7*R*,8*R*)-**3aa** (**TS1**). With the *N,O*-ligands **L7**, the cyanogroup of **2a** could coordinate with the Cu(I) center, which can stabilize the negatively charged nitrogen atom in the proposed transition states (**TS2**).<sup>5</sup> An *exo* approach of dipolarophile (**2a**) to the copper(I) complex occurred which is compatible with the experimental results.

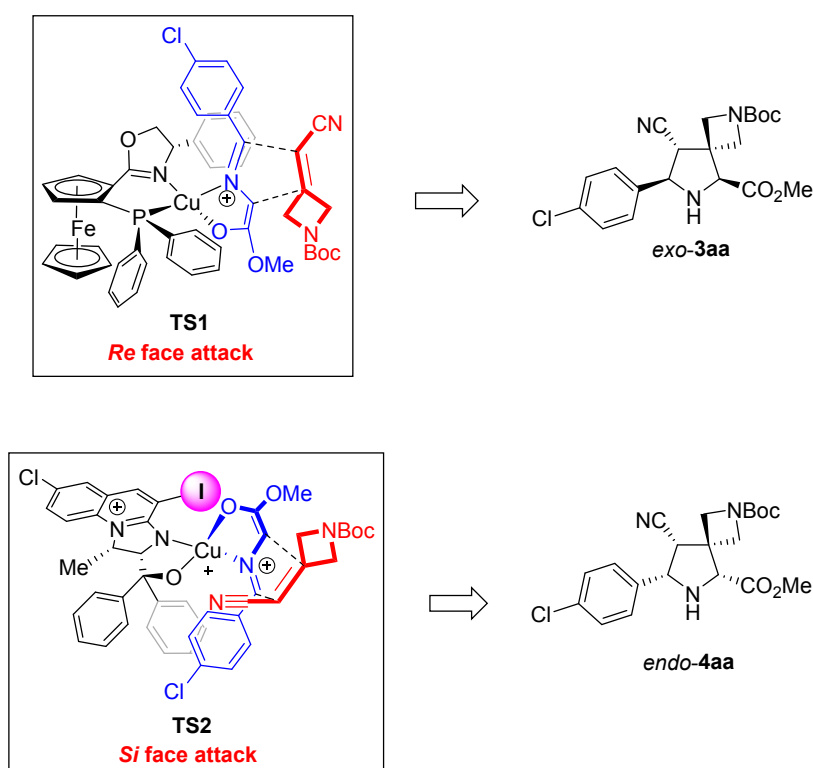

Fig S1. Proposed transition states.

## References

- (1) (a) A. López-Pérez, J. Adrio, J. C. Carretero, *J. Am. Chem. Soc.* 2008, **130**, 10084. (b) C.-J. Wang, G. Liang, Z.-Y. Xue, F. Gao, *J. Am. Chem. Soc.* 2008, **130**, 17250.
- (2) B. A. Chalyk, A. A. Isakov, M. V. Butko, K. V. Hrebenuk, O. V. Savych, O. V. Kucher, K. S. Gavrilenko, T. V. Druzhenko, V. S. Yarmolchuk, S. Zozulya, and P. K. Mykhailiuk, *Eur. J. Org. Chem.* 2017, 4530.
- (3) J. Y. Cassayre, P. Renold, T. Pitterna, M. El Qacemi, WO2013026931A1, 2013.
- (4) E. Forcellini, S. Boutin, C.-A. Lefebvre, E. E. Shayhidin, M.-C. Boulanger, G. Rheaume, X. Barbeau, P. Lagüe, P. Mathieu, J.-F. Paquin, *Eur. J. Med. Chem.* 2018, **147**, 130.
- (5) (a) X.-X. Yan, Q. Peng, Y. Zhang, K. Zhang, W. Hong, X.-L. Hou, Y.-D. Wu, *Angew. Chem., Int. Ed.* 2006, **45**, 1979. (b) H. Y. Kim, H.-J. Shih, W. E. Knabe, K. Oh, *Angew. Chem., Int. Ed.* 2009, **48**, 7420. (c) T.-L. Liu, Z.-L. He, H.-Y. Tao, Y.-P. Cai and C.-J. Wang, *Chem. Commun.*, 2011, **47**, 2616-2618.

## The absolute configuration determination of 3fa and 4fa

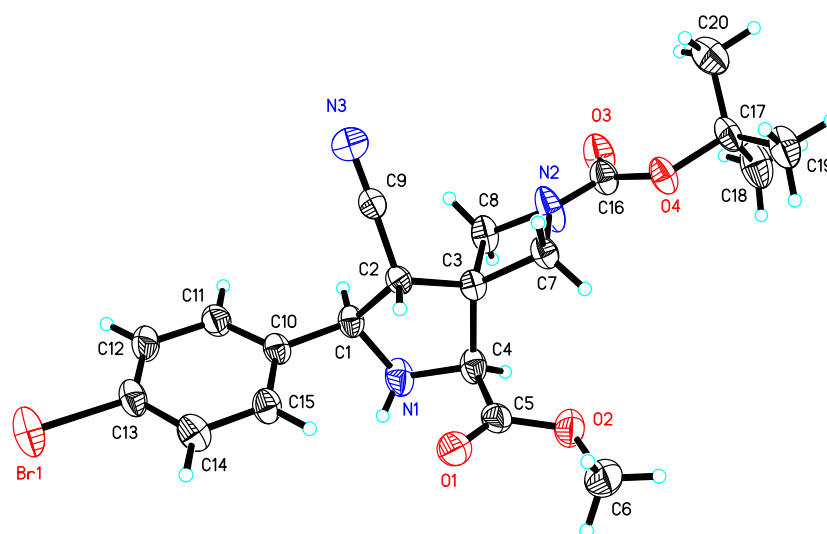

**Fig S2.** X-ray structure of (*5S,7R,8R*)-**3fa**

Ellipsoids are drawn at the 30% probability level.

### Crystal data and structure refinement for CCDC 1914517

(CCDC 1914517 contains the supplementary crystallographic data for this paper. These data can be obtained free of charge via [www.ccdc.cam.ac.uk/conts/retrieving.html](http://www.ccdc.cam.ac.uk/conts/retrieving.html).)

Table S2. Crystal data and structure refinement for (*5S,7R,8R*)-**3fa**.

|                                 |                                                                  |          |
|---------------------------------|------------------------------------------------------------------|----------|
| Identification code             | <i>(5S,7R,8R)</i> - <b>3fa</b>                                   |          |
| Empirical formula               | C <sub>20</sub> H <sub>24</sub> Br N <sub>3</sub> O <sub>4</sub> |          |
| Formula weight                  | 450.33                                                           |          |
| Temperature                     | 296(2) K                                                         |          |
| Wavelength                      | 0.71073 Å                                                        |          |
| Crystal system                  | Orthorhombic                                                     |          |
| Space group                     | P 21 21 2                                                        |          |
| Unit cell dimensions            | a = 10.2024(3) Å                                                 | α = 90°. |
|                                 | b = 31.7463(10) Å                                                | β = 90°. |
|                                 | c = 6.5544(2) Å                                                  | γ = 90°. |
| Volume                          | 2122.89(11) Å <sup>3</sup>                                       |          |
| Z                               | 4                                                                |          |
| Density (calculated)            | 1.409 Mg/m <sup>3</sup>                                          |          |
| Absorption coefficient          | 1.966 mm <sup>-1</sup>                                           |          |
| F(000)                          | 928                                                              |          |
| Crystal size                    | 0.200 x 0.170 x 0.130 mm <sup>3</sup>                            |          |
| Theta range for data collection | 2.373 to 25.990°.                                                |          |

|                                   |                                             |
|-----------------------------------|---------------------------------------------|
| Index ranges                      | -12<=h<=12, -39<=k<=35, -8<=l<=7            |
| Reflections collected             | 11503                                       |
| Independent reflections           | 4090 [R(int) = 0.0271]                      |
| Completeness to theta = 25.242°   | 98.6 %                                      |
| Absorption correction             | Mutli-scan                                  |
| Max. and min. transmission        | 0.7456 and 0.5520                           |
| Refinement method                 | Full-matrix least-squares on F <sup>2</sup> |
| Data / restraints / parameters    | 4090 / 1 / 262                              |
| Goodness-of-fit on F <sup>2</sup> | 1.034                                       |
| Final R indices [I>2sigma(I)]     | R1 = 0.0369, wR2 = 0.0832                   |
| R indices (all data)              | R1 = 0.0552, wR2 = 0.0905                   |
| Absolute structure parameter      | 0.004(6)                                    |
| Largest diff. peak and hole       | 0.496 and -0.532 e.Å <sup>-3</sup>          |

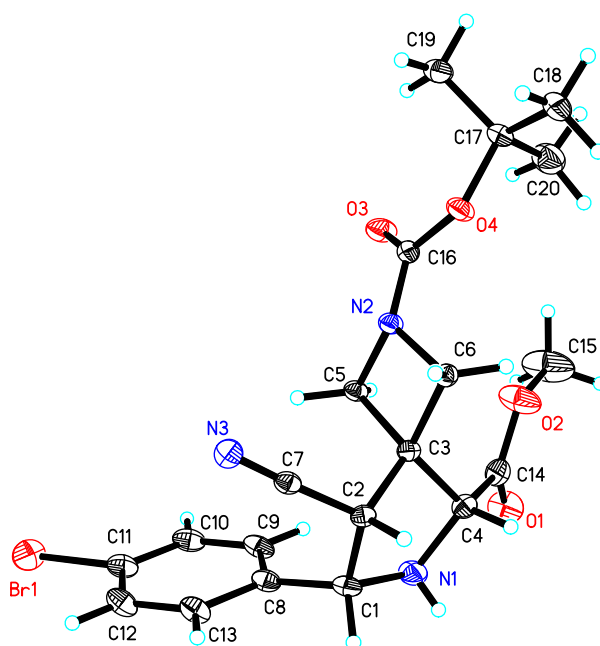

**Fig S3.** X-ray structure of (5*R*,7*S*,8*R*)-**4fa**

Ellipsoids are drawn at the 30% probability level.

**Crystal data and structure refinement for CCDC 1914518**

(CCDC 1914518 contains the supplementary crystallographic data for this paper. These data can be obtained free of charge via [www.ccdc.cam.ac.uk/conts/retrieving.html](http://www.ccdc.cam.ac.uk/conts/retrieving.html).)

Table S3. Crystal data and structure refinement for (5*R*,7*S*,8*R*)-**4fa**.

|                     |                                                                  |
|---------------------|------------------------------------------------------------------|
| Identification code | (5 <i>R</i> ,7 <i>S</i> ,8 <i>R</i> )- <b>4fa</b>                |
| Empirical formula   | C <sub>20</sub> H <sub>24</sub> Br N <sub>3</sub> O <sub>4</sub> |

|                                   |                                             |                       |
|-----------------------------------|---------------------------------------------|-----------------------|
| Formula weight                    | 450.33                                      |                       |
| Temperature                       | 193(2) K                                    |                       |
| Wavelength                        | 0.71073 Å                                   |                       |
| Crystal system                    | Orthorhombic                                |                       |
| Space group                       | P 21 21 21                                  |                       |
| Unit cell dimensions              | a = 6.4829(2) Å                             | $\alpha = 90^\circ$ . |
|                                   | b = 12.2525(3) Å                            | $\beta = 90^\circ$ .  |
|                                   | c = 26.9553(7) Å                            | $\gamma = 90^\circ$ . |
| Volume                            | 2141.11(10) Å <sup>3</sup>                  |                       |
| Z                                 | 4                                           |                       |
| Density (calculated)              | 1.397 Mg/m <sup>3</sup>                     |                       |
| Absorption coefficient            | 1.949 mm <sup>-1</sup>                      |                       |
| F(000)                            | 928                                         |                       |
| Crystal size                      | 0.170 x 0.140 x 0.100 mm <sup>3</sup>       |                       |
| Theta range for data collection   | 3.023 to 25.994°.                           |                       |
| Index ranges                      | -7<=h<=7, -15<=k<=13, -33<=l<=28            |                       |
| Reflections collected             | 10450                                       |                       |
| Independent reflections           | 4108 [R(int) = 0.0299]                      |                       |
| Completeness to theta = 25.242°   | 99.1 %                                      |                       |
| Absorption correction             | Semi-empirical from equivalents             |                       |
| Max. and min. transmission        | 0.7456 and 0.3565                           |                       |
| Refinement method                 | Full-matrix least-squares on F <sup>2</sup> |                       |
| Data / restraints / parameters    | 4108 / 1 / 262                              |                       |
| Goodness-of-fit on F <sup>2</sup> | 1.042                                       |                       |
| Final R indices [I>2sigma(I)]     | R1 = 0.0322, wR2 = 0.0731                   |                       |
| R indices (all data)              | R1 = 0.0389, wR2 = 0.0760                   |                       |
| Absolute structure parameter      | 0.021(6)                                    |                       |
| Largest diff. peak and hole       | 0.541 and -0.487 e.Å <sup>-3</sup>          |                       |

## Chiral HPLC Chromatograms

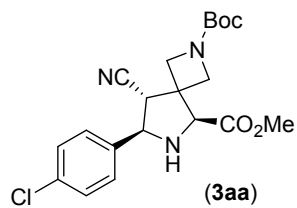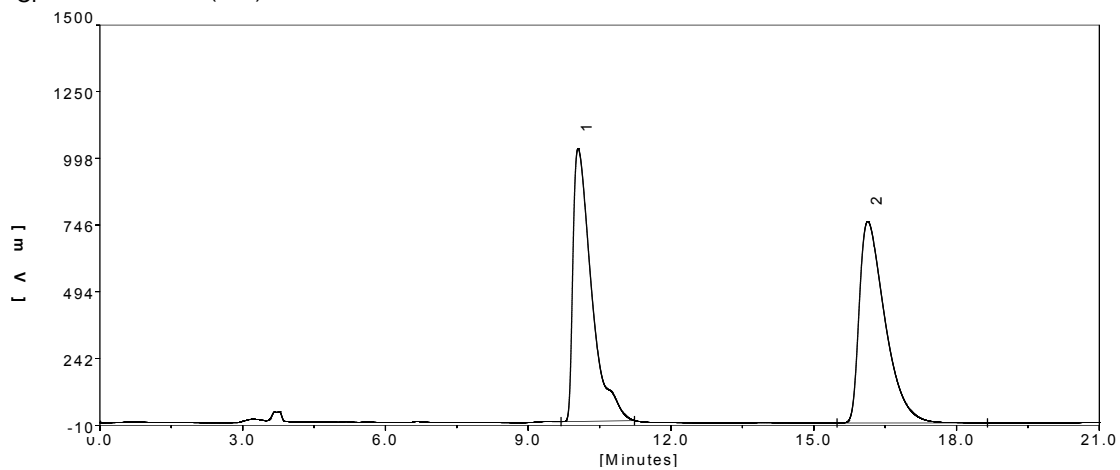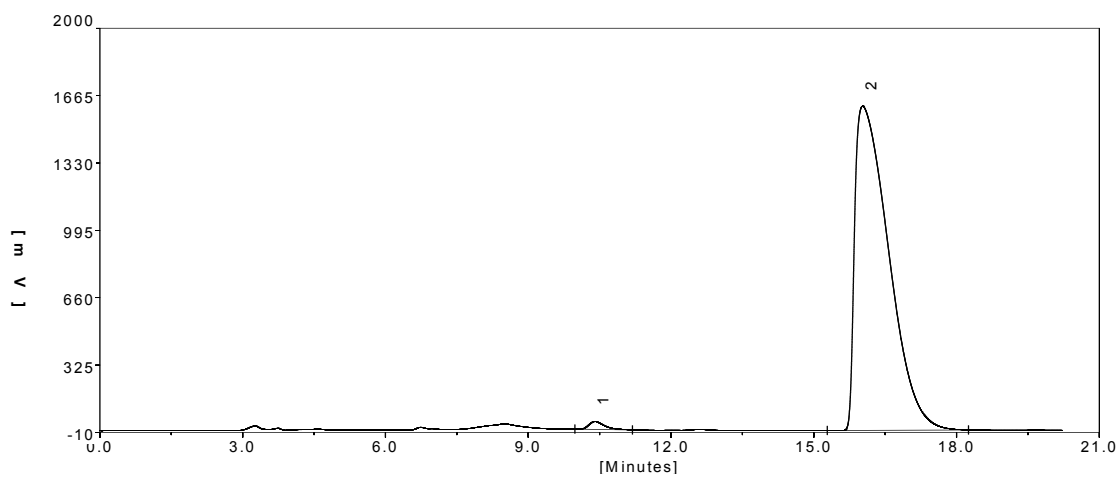

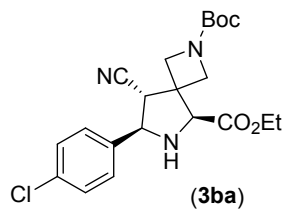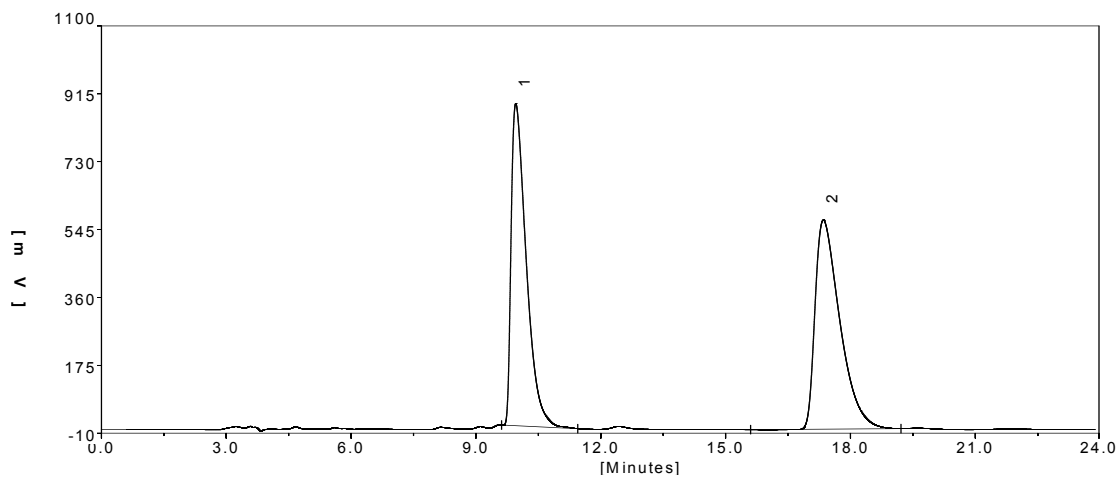

| # | Ret Time (min) | Height (mV) | Area (mV.sec) | Area (%) |
|---|----------------|-------------|---------------|----------|
| 1 | 9.98750        | 878.14      | 22126.60      | 48.4710  |
| 2 | 17.37833       | 570.14      | 23522.51      | 51.5290  |

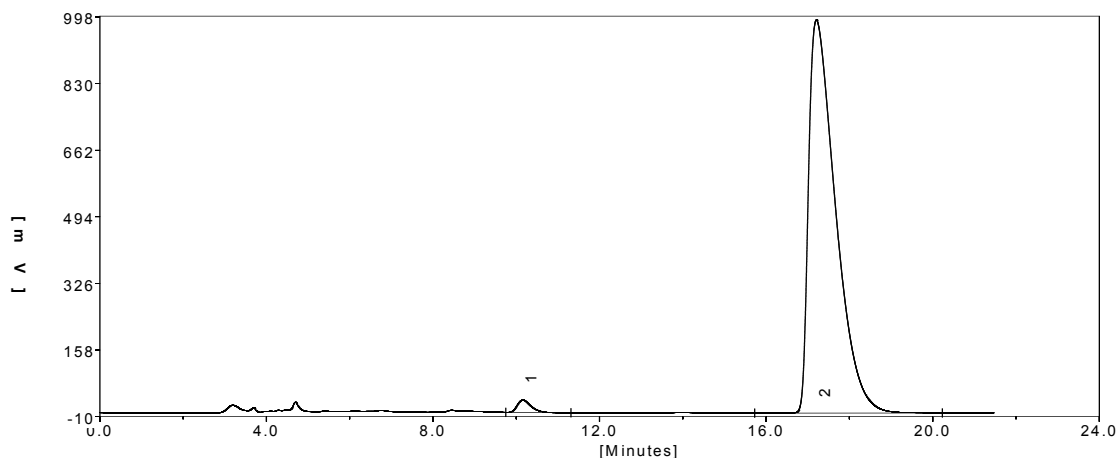

| # | Ret Time (min) | Height (mV) | Area (mV.sec) | Area (%) |
|---|----------------|-------------|---------------|----------|
| 1 | 10.15333       | 31.54       | 711.39        | 1.5740   |
| 2 | 17.20750       | 991.40      | 44484.49      | 98.4260  |



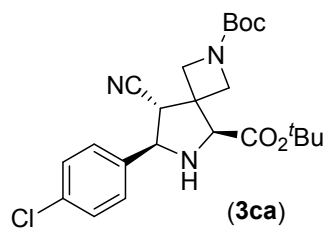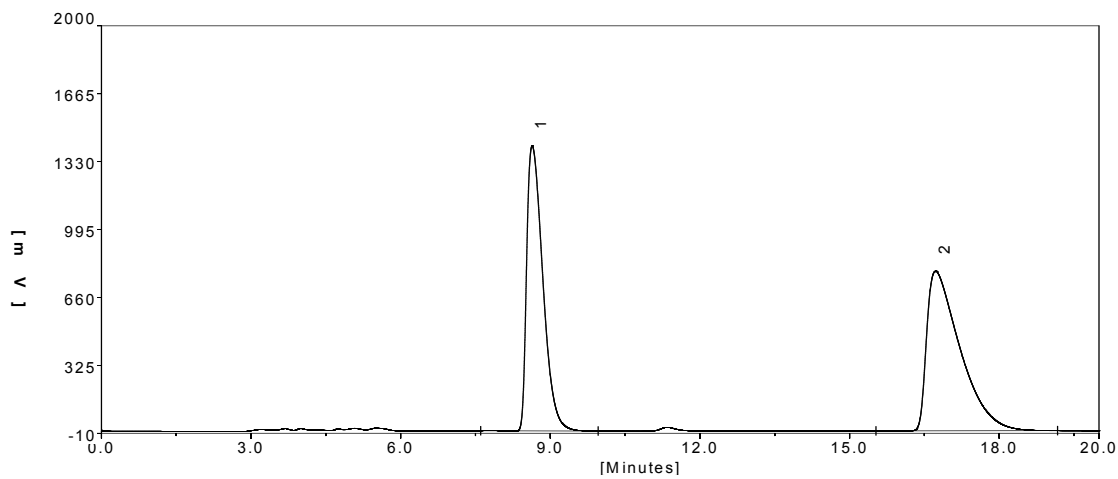

| # | Ret Time (min) | Height (mV) | Area (mV.sec) | Area (%) |
|---|----------------|-------------|---------------|----------|
| 1 | 8.63667        | 1406.54     | 31639.78      | 46.4025  |
| 2 | 16.72500       | 788.32      | 36545.69      | 53.5975  |

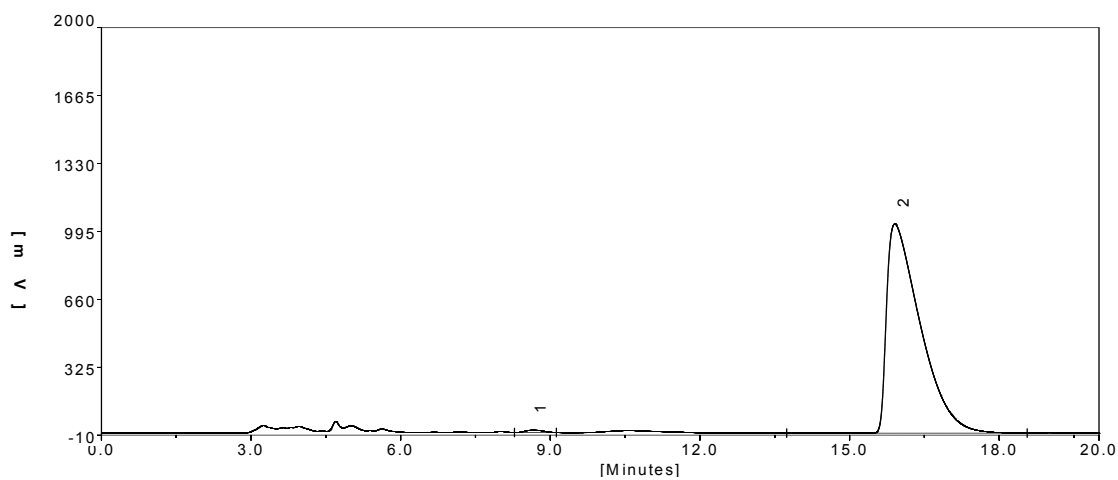

| # | Ret Time (min) | Height (mV) | Area (mV.sec) | Area (%) |
|---|----------------|-------------|---------------|----------|
| 1 | 8.63083        | 11.46       | 287.23        | 0.5931   |
| 2 | 15.90750       | 1032.13     | 48141.43      | 99.4069  |

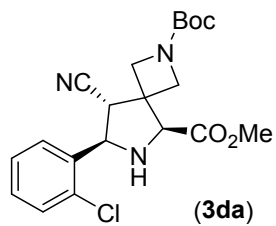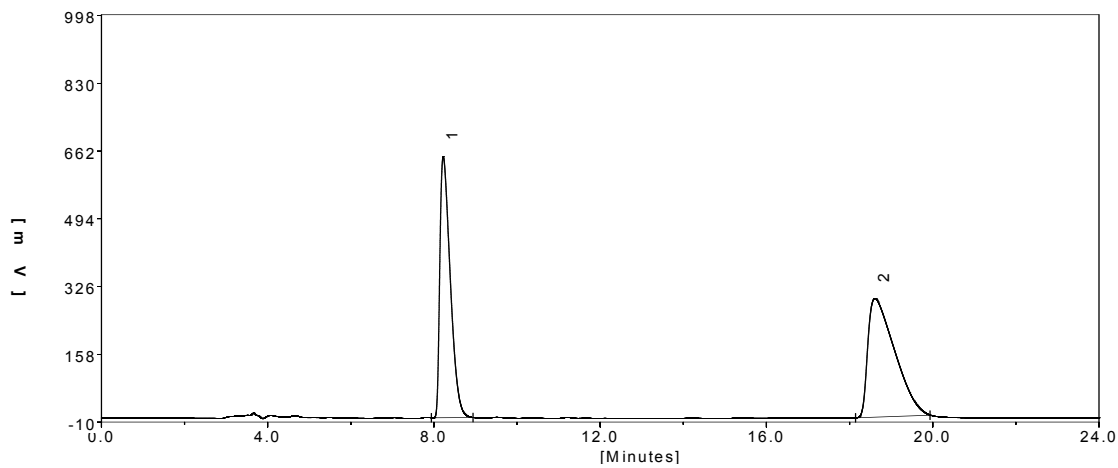

| # | Ret Time (min) | Height (mV) | Area (mV.sec) | Area (%) |
|---|----------------|-------------|---------------|----------|
| 1 | 8.22500        | 647.35      | 11266.32      | 46.1355  |
| 2 | 18.61083       | 294.46      | 13153.77      | 53.8645  |

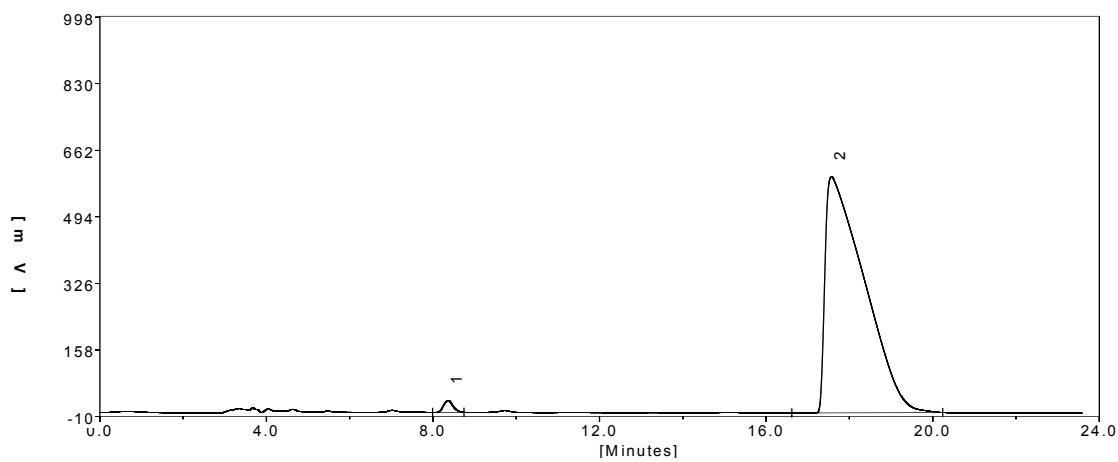

| # | Ret Time (min) | Height (mV) | Area (mV.sec) | Area (%) |
|---|----------------|-------------|---------------|----------|
| 1 | 8.35667        | 29.99       | 468.44        | 1.1959   |
| 2 | 17.56667       | 595.18      | 38701.35      | 98.8041  |

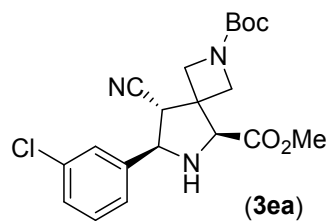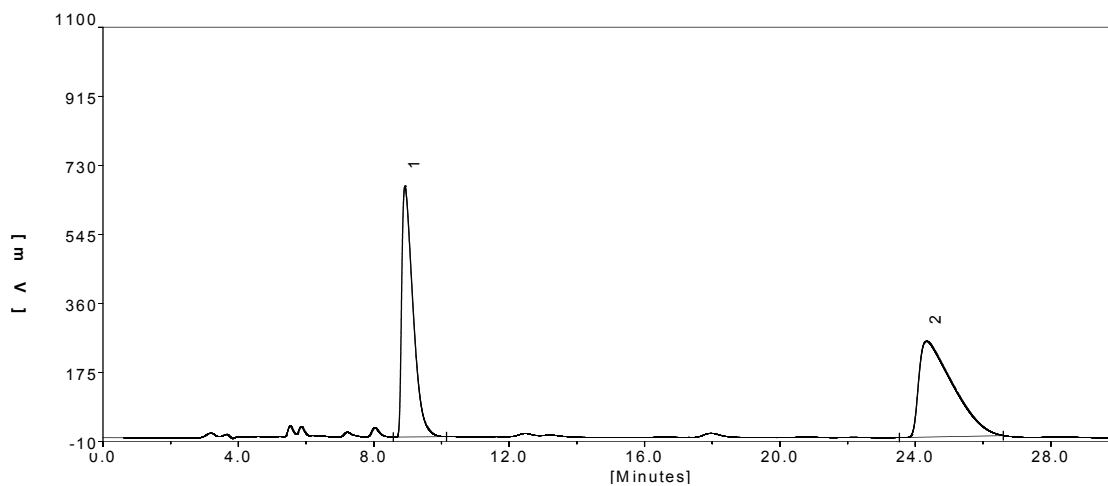

| # | Ret Time (min) | Height (mV) | Area (mV.sec) | Area (%) |
|---|----------------|-------------|---------------|----------|
| 1 | 8.95333        | 672.19      | 15452.12      | 46.6247  |
| 2 | 24.35833       | 257.06      | 17689.40      | 53.3753  |

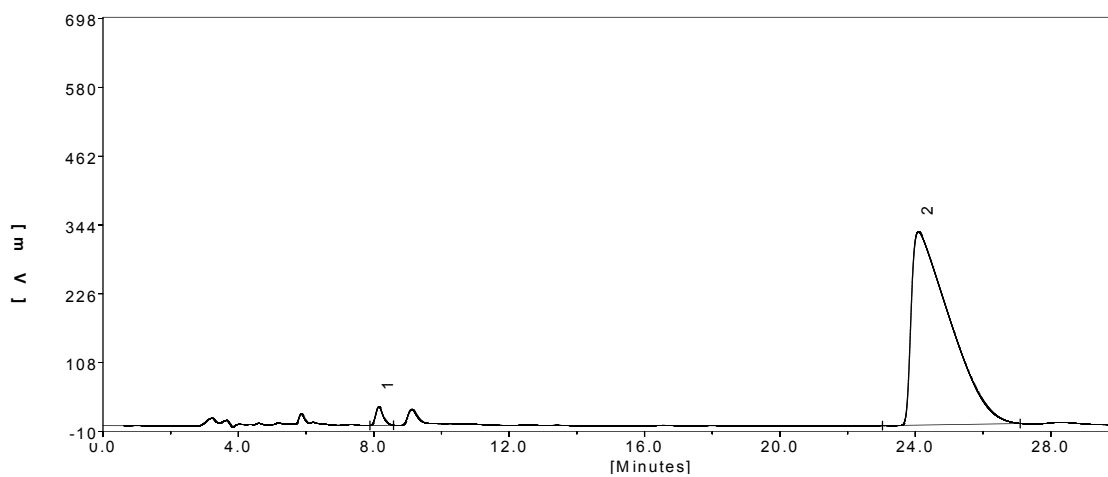

| # | Ret Time (min) | Height (mV) | Area (mV.sec) | Area (%) |
|---|----------------|-------------|---------------|----------|
| 1 | 8.18167        | 31.91       | 482.95        | 1.8138   |
| 2 | 24.12167       | 331.50      | 26142.56      | 98.1862  |

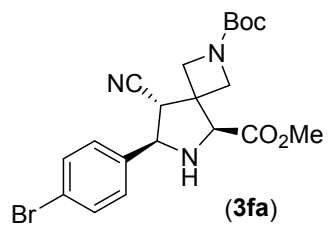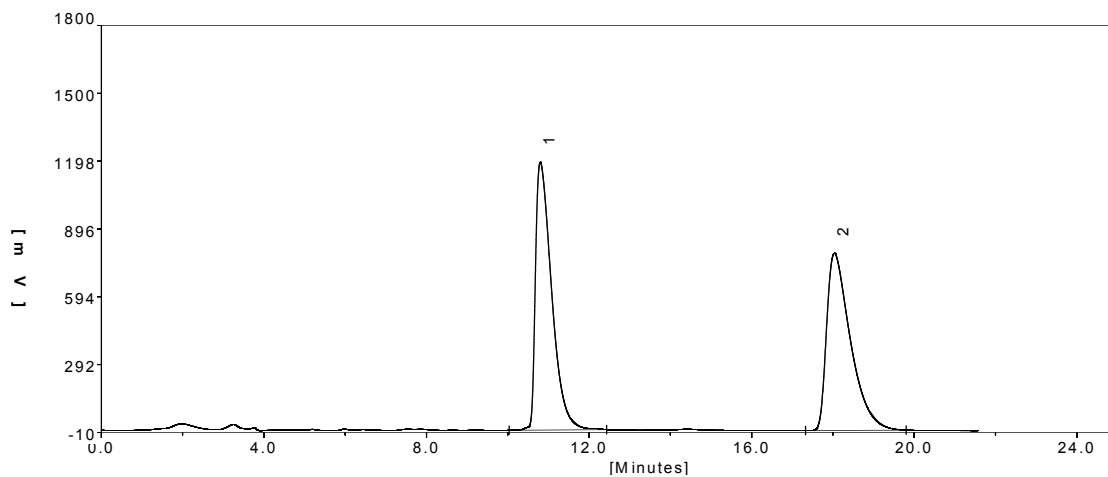

| # | Ret Time (min) | Height (mV) | Area (mV.sec) | Area (%) |
|---|----------------|-------------|---------------|----------|
| 1 | 10.80167       | 1191.65     | 32962.23      | 50.7590  |
| 2 | 18.03833       | 788.28      | 31976.44      | 49.2410  |

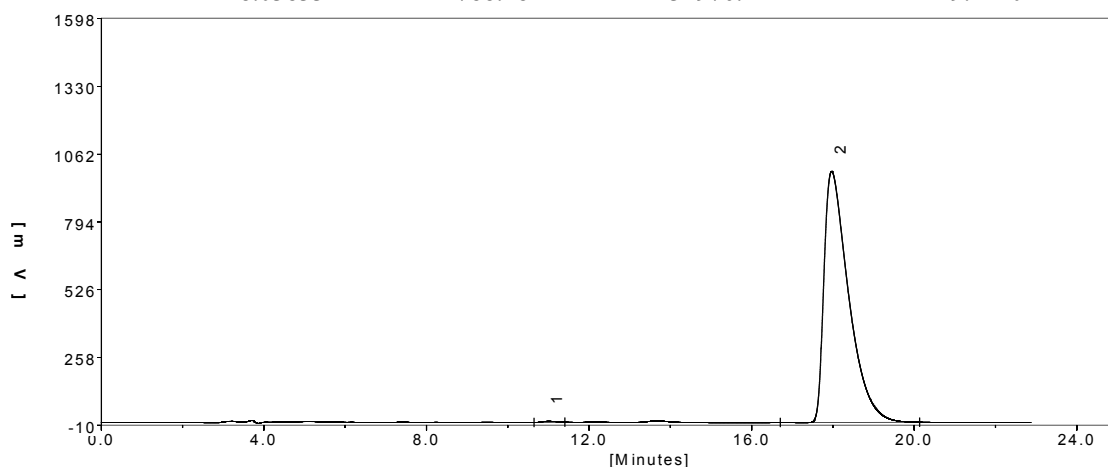

| # | Ret Time (min) | Height (mV) | Area (mV.sec) | Area (%) |
|---|----------------|-------------|---------------|----------|
| 1 | 10.98917       | 4.40        | 95.42         | 0.2286   |
| 2 | 17.96917       | 993.55      | 41640.82      | 99.7714  |

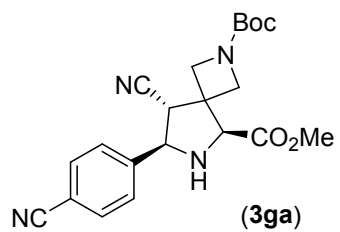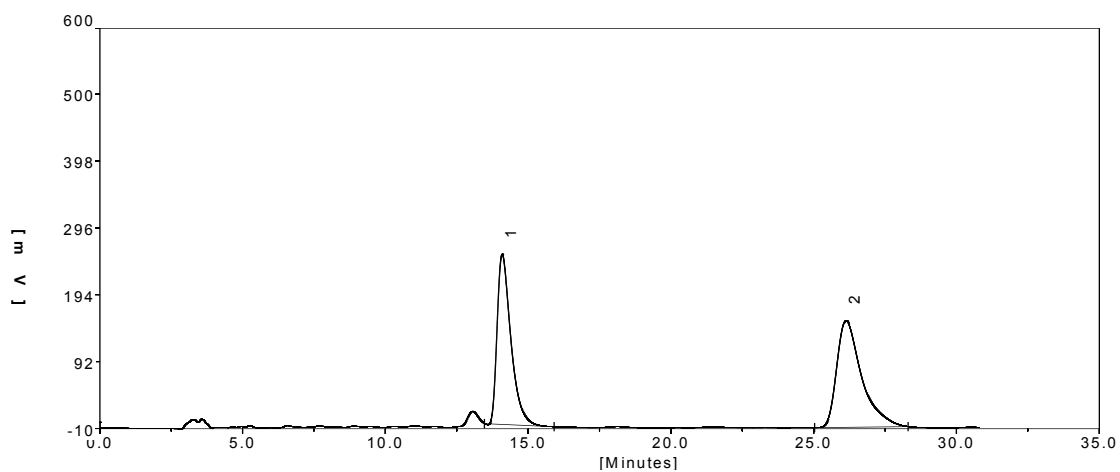

| # | Ret Time (min) | Height (mV) | Area (mV.sec) | Area (%) |
|---|----------------|-------------|---------------|----------|
| 1 | 14.09167       | 259.51      | 8671.15       | 46.9495  |
| 2 | 26.13333       | 162.65      | 9797.96       | 53.0505  |

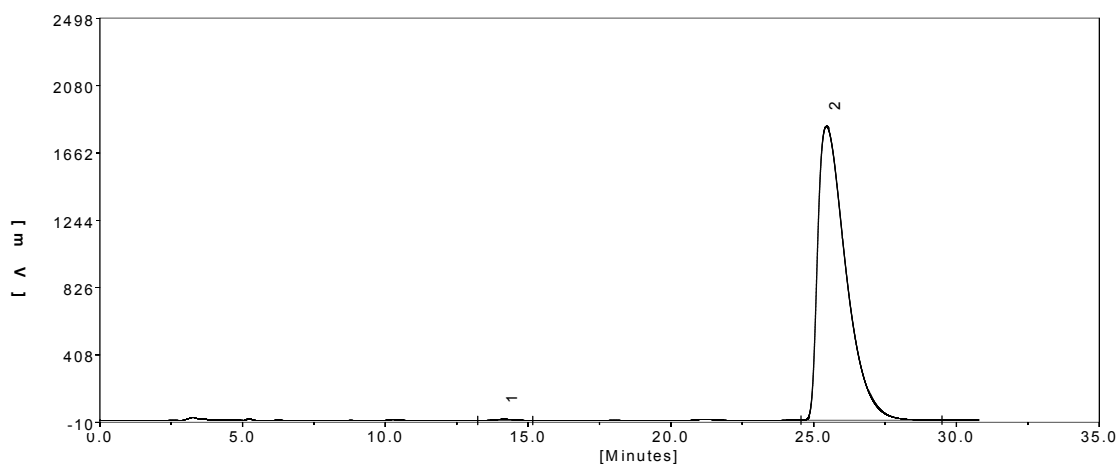

| # | Ret Time (min) | Height (mV) | Area (mV.sec) | Area (%) |
|---|----------------|-------------|---------------|----------|
| 1 | 14.13000       | 8.38        | 351.24        | 0.2829   |
| 2 | 25.44417       | 1826.17     | 123795.03     | 99.7171  |

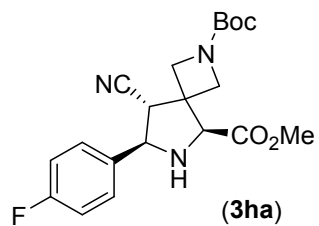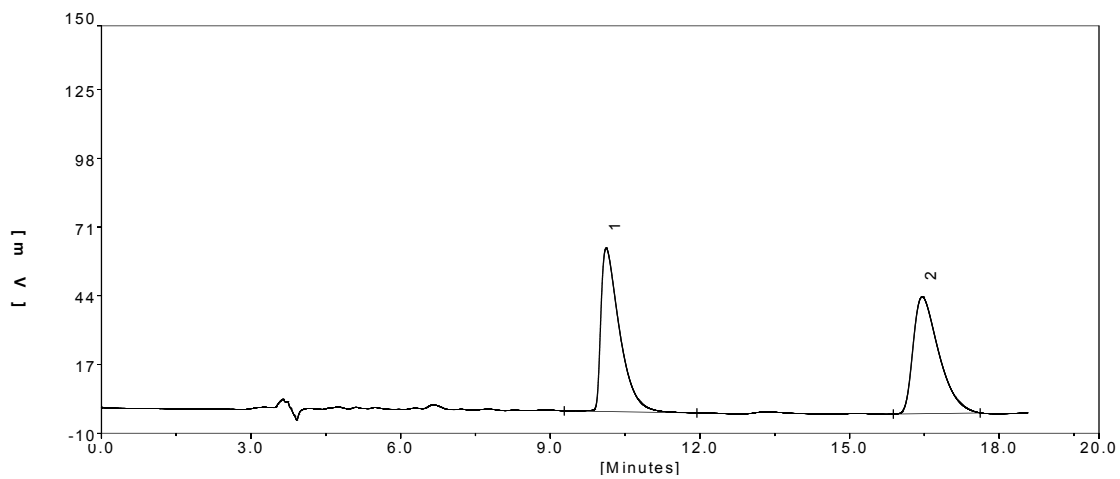

| # | Ret Time (min) | Height (mV) | Area (mV.sec) | Area (%) |
|---|----------------|-------------|---------------|----------|
| 1 | 10.12083       | 64.22       | 1664.14       | 50.3584  |
| 2 | 16.45500       | 45.98       | 1640.45       | 49.6416  |

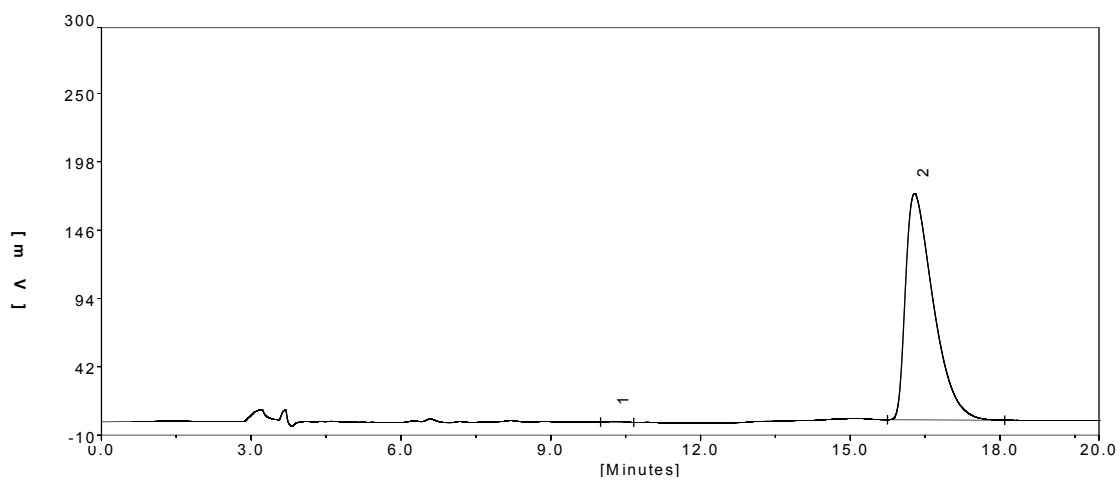

| # | Ret Time (min) | Height (mV) | Area (mV.sec) | Area (%) |
|---|----------------|-------------|---------------|----------|
| 1 | 10.29500       | 0.66        | 13.12         | 0.1973   |
| 2 | 16.30667       | 172.25      | 6636.29       | 99.8027  |

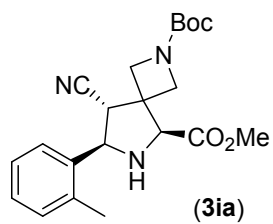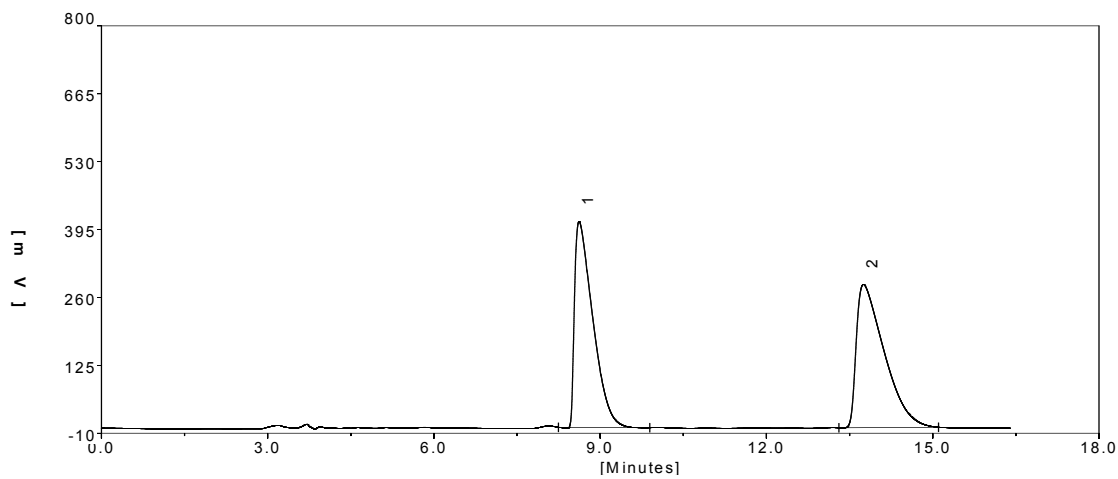

| # | Ret Time (min) | Height (mV) | Area (mV.sec) | Area (%) |
|---|----------------|-------------|---------------|----------|
| 1 | 8.62000        | 409.75      | 9356.18       | 48.5388  |
| 2 | 13.75083       | 284.85      | 9919.50       | 51.4612  |

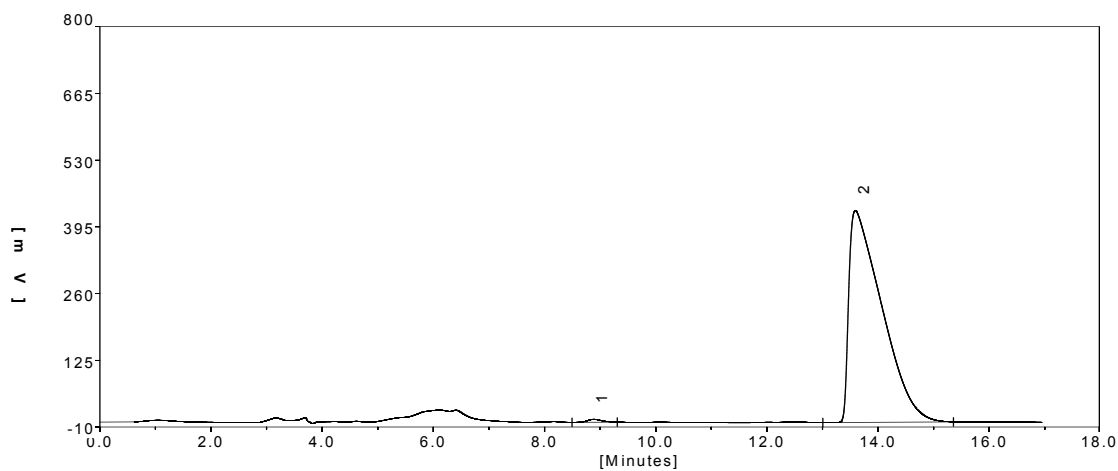

| # | Ret Time (min) | Height (mV) | Area (mV.sec) | Area (%) |
|---|----------------|-------------|---------------|----------|
| 1 | 8.90000        | 6.00        | 106.11        | 0.5972   |
| 2 | 13.61167       | 428.76      | 17663.63      | 99.4028  |

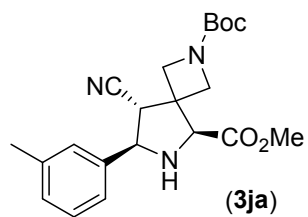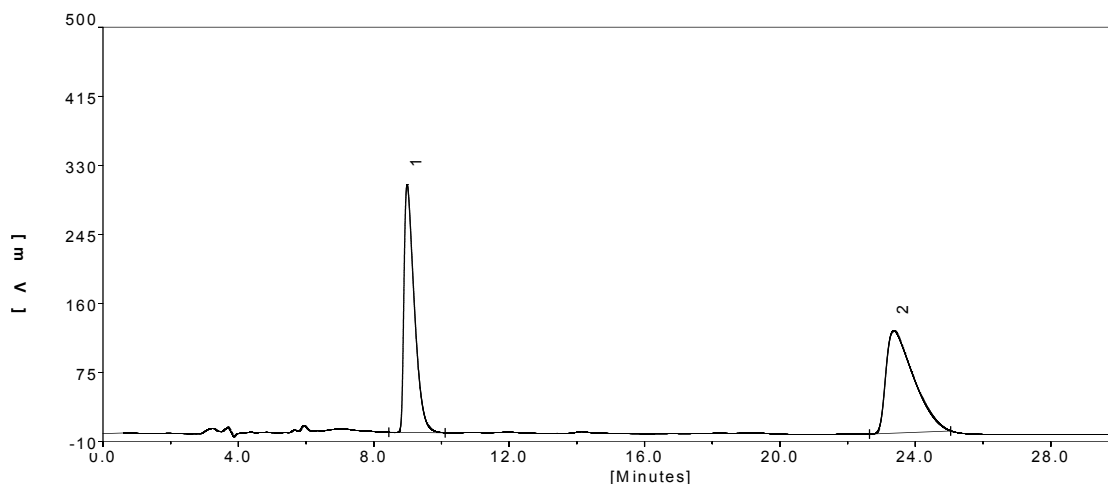

| # | Ret Time (min) | Height (mV) | Area (mV.sec) | Area (%) |
|---|----------------|-------------|---------------|----------|
| 1 | 9.01750        | 305.11      | 6448.96       | 47.4705  |
| 2 | 23.39167       | 126.18      | 7136.23       | 52.5295  |

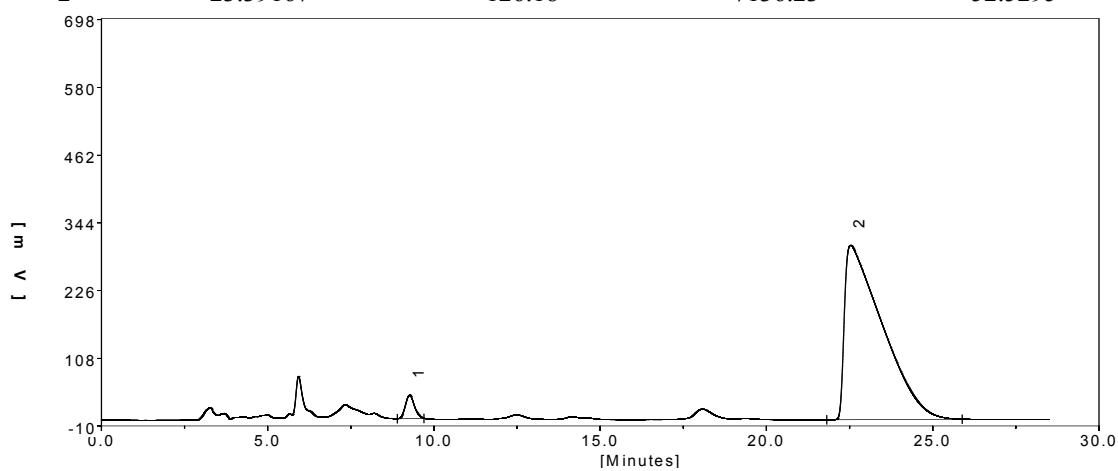

| # | Ret Time (min) | Height (mV) | Area (mV.sec) | Area (%) |
|---|----------------|-------------|---------------|----------|
| 1 | 9.26917        | 40.93       | 771.11        | 3.1142   |
| 2 | 22.53083       | 303.99      | 23990.40      | 96.8858  |



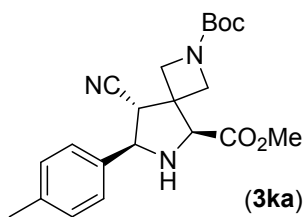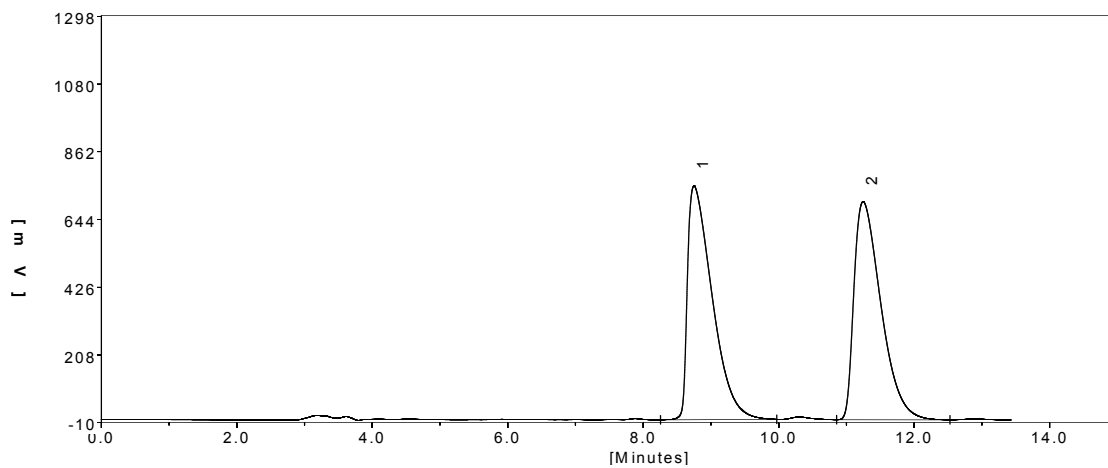

| # | Ret Time (min) | Height (mV) | Area (mV.sec) | Area (%) |
|---|----------------|-------------|---------------|----------|
| 1 | 8.75000        | 752.58      | 19047.87      | 49.5488  |
| 2 | 11.24667       | 702.45      | 19394.81      | 50.4512  |

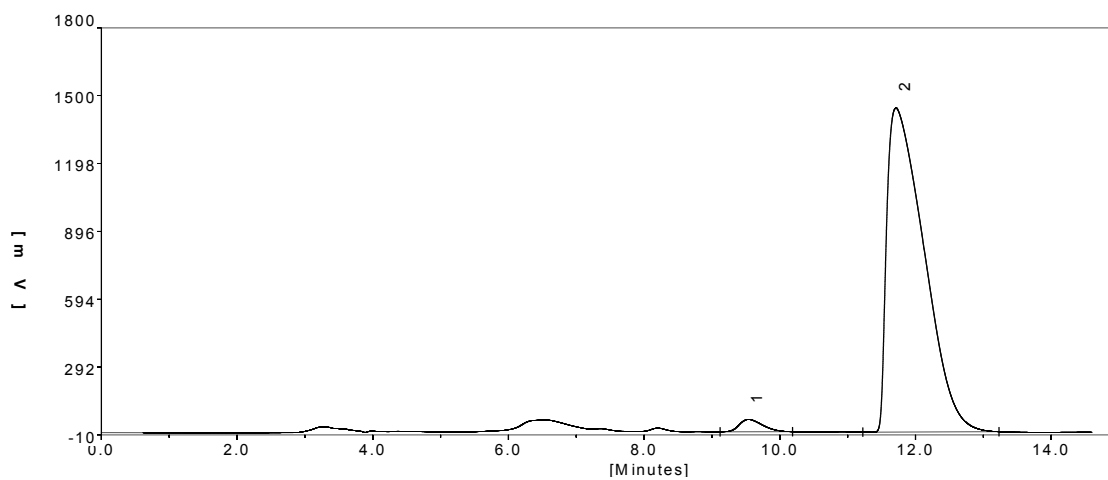

| # | Ret Time (min) | Height (mV) | Area (mV.sec) | Area (%) |
|---|----------------|-------------|---------------|----------|
| 1 | 9.55667        | 55.01       | 1313.01       | 2.3403   |
| 2 | 11.73667       | 1441.24     | 54791.27      | 97.6597  |

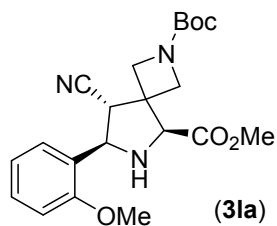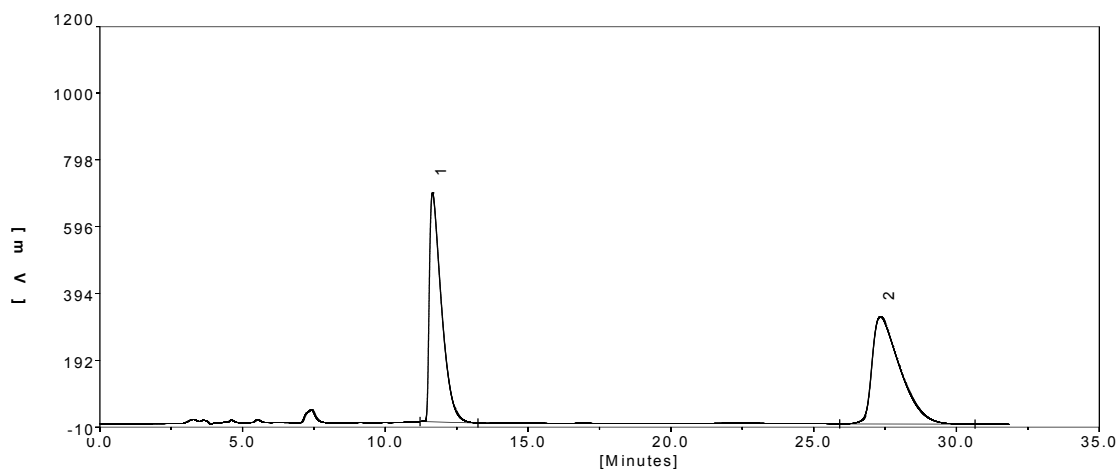

| # | Ret Time (min) | Height (mV) | Area (mV.sec) | Area (%) |
|---|----------------|-------------|---------------|----------|
| 1 | 11.65083       | 692.28      | 20271.43      | 48.0362  |
| 2 | 27.32917       | 324.76      | 21928.86      | 51.9638  |

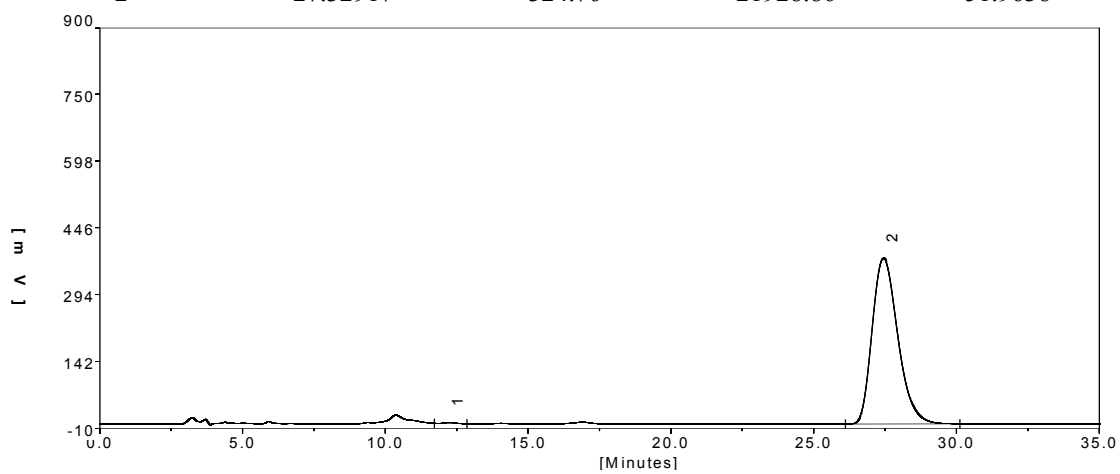

| # | Ret Time (min) | Height (mV) | Area (mV.sec) | Area (%) |
|---|----------------|-------------|---------------|----------|
| 1 | 12.22167       | 2.65        | 58.78         | 0.2492   |
| 2 | 27.44500       | 377.09      | 23523.86      | 99.7508  |

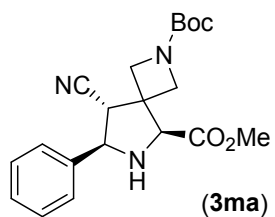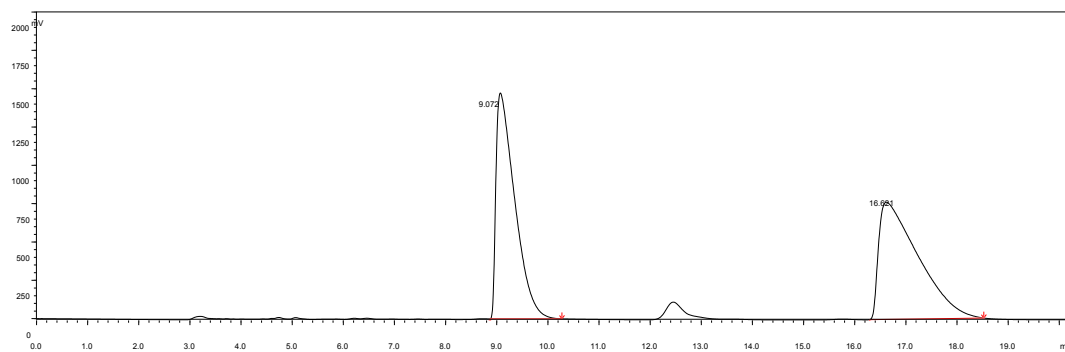

| # | Ret Time (min) | Height (mV) | Area (mV.sec) | Area (%) |
|---|----------------|-------------|---------------|----------|
| 1 | 9.072          | 1472555     | 37536555      | 47.808   |
| 2 | 16.621         | 764461      | 40978638      | 52.192   |

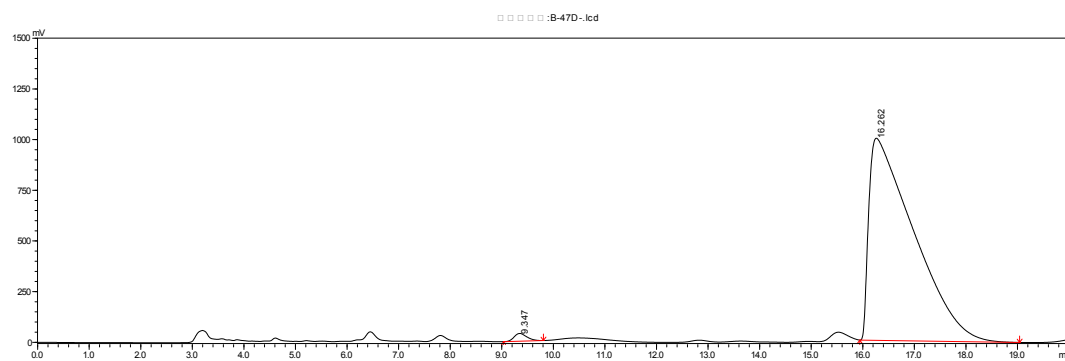

| # | Ret Time (min) | Height (mV) | Area (mV.sec) | Area (%) |
|---|----------------|-------------|---------------|----------|
| 1 | 9.347          | 38359       | 662721        | 1.085    |
| 2 | 16.262         | 997112      | 60445147      | 98.915   |

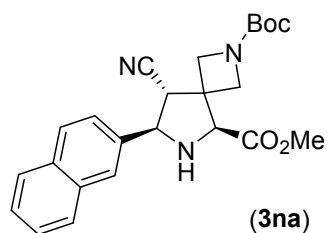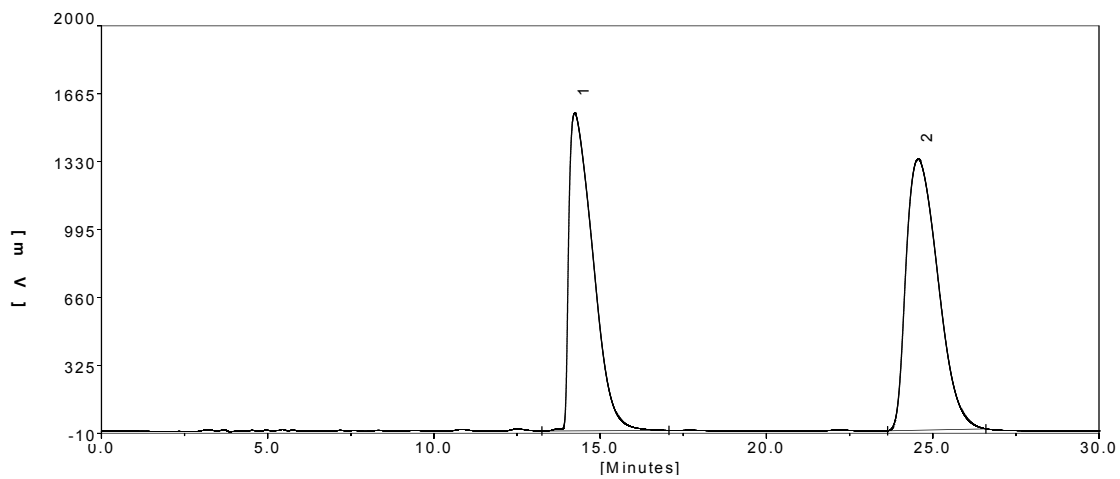

| # | Ret Time (min) | Height (mV) | Area (mV.sec) | Area (%) |
|---|----------------|-------------|---------------|----------|
| 1 | 14.23417       | 1568.20     | 78130.62      | 46.8003  |
| 2 | 24.56000       | 1338.35     | 88813.95      | 53.1997  |

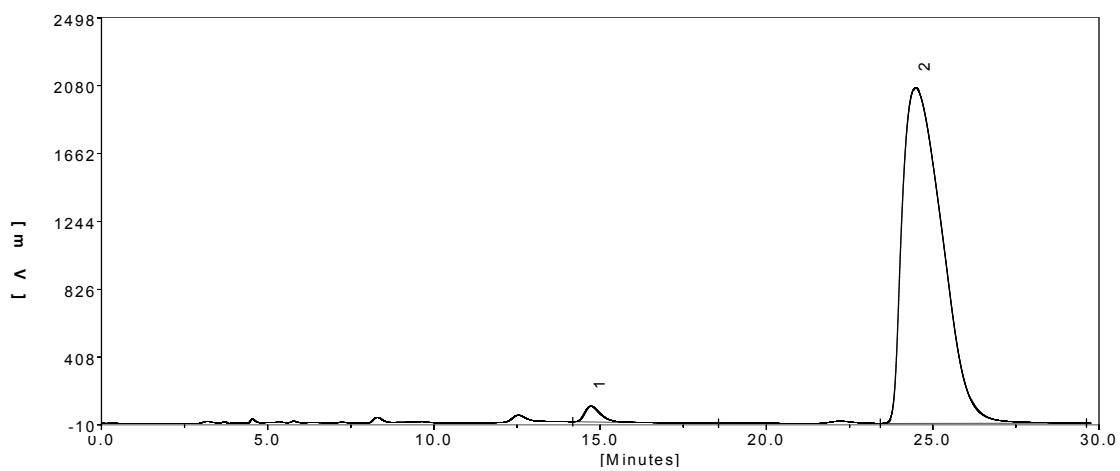

| # | Ret Time (min) | Height (mV) | Area (mV.sec) | Area (%) |
|---|----------------|-------------|---------------|----------|
| 1 | 14.71417       | 97.45       | 3133.46       | 1.8031   |
| 2 | 24.48750       | 2068.03     | 170646.90     | 98.1969  |

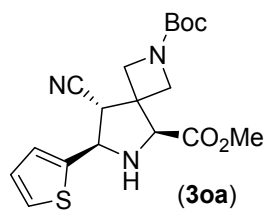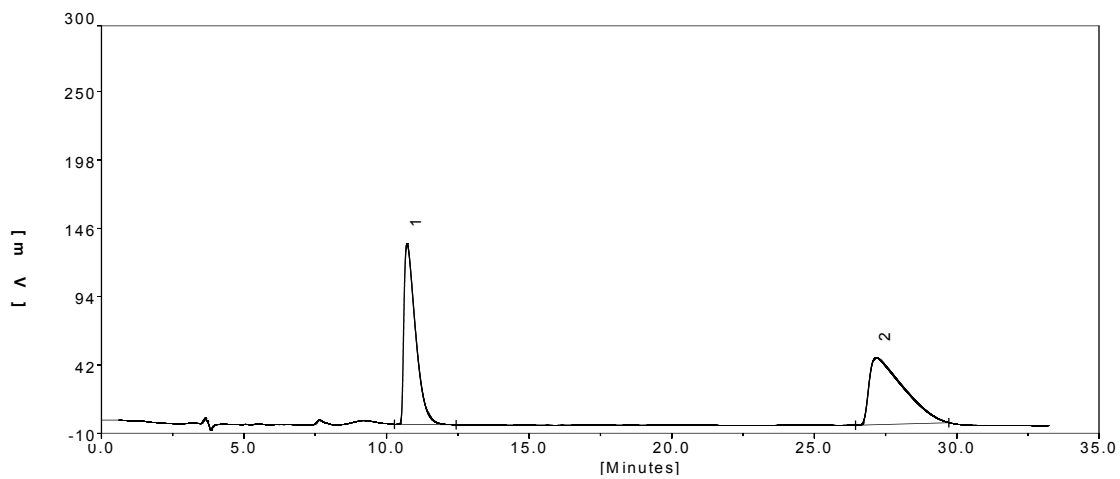

| # | Ret Time (min) | Height (mV) | Area (mV.sec) | Area (%) |
|---|----------------|-------------|---------------|----------|
| 1 | 10.74000       | 137.61      | 3882.58       | 48.1475  |
| 2 | 27.19167       | 50.92       | 4181.35       | 51.8525  |

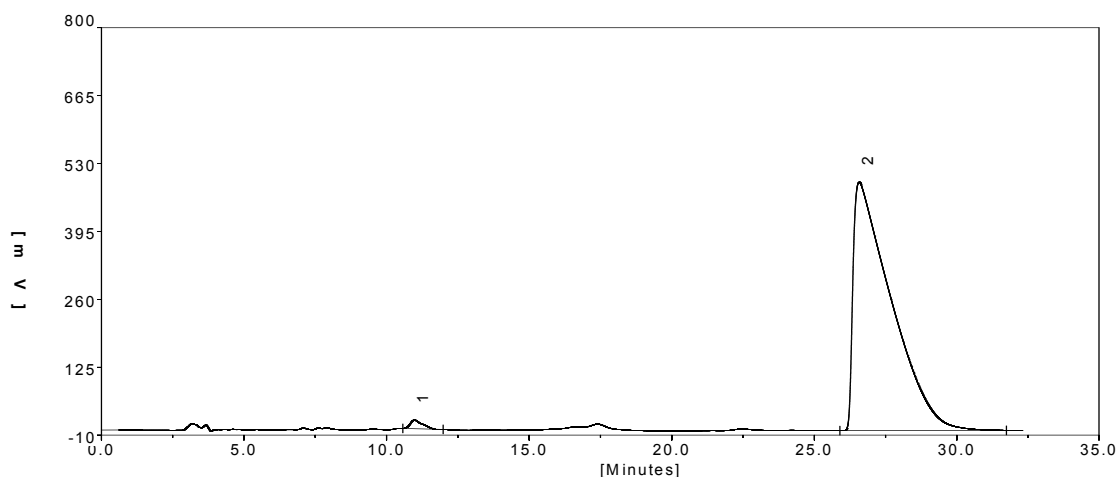

| # | Ret Time (min) | Height (mV) | Area (mV.sec) | Area (%) |
|---|----------------|-------------|---------------|----------|
| 1 | 10.98167       | 17.32       | 502.08        | 1.0875   |
| 2 | 26.59167       | 494.09      | 45668.48      | 98.9125  |

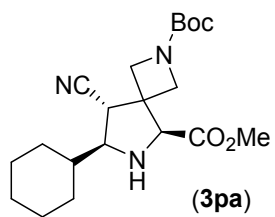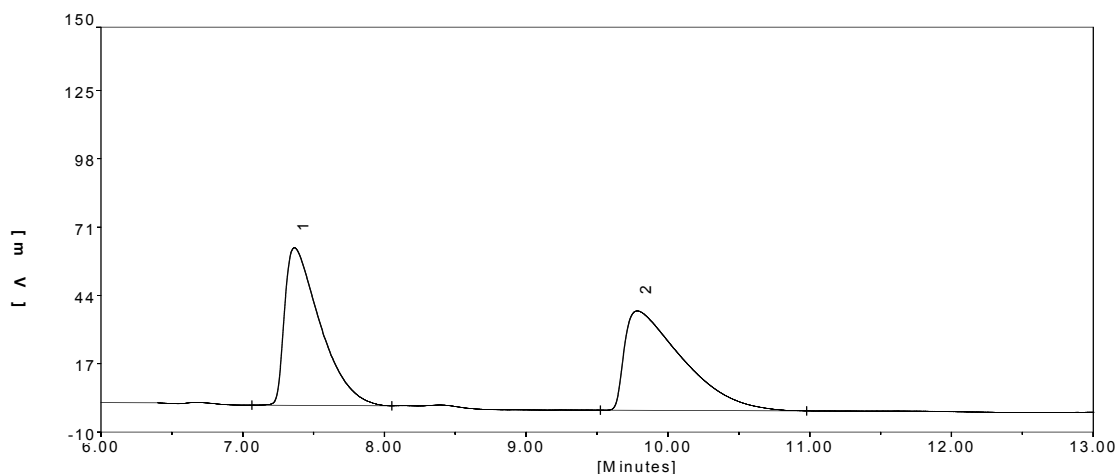

| # | Ret Time (min) | Height (mV) | Area (mV.sec) | Area (%) |
|---|----------------|-------------|---------------|----------|
| 1 | 7.36500        | 62.26       | 1085.80       | 49.3937  |
| 2 | 9.78333        | 39.27       | 1112.46       | 50.6063  |

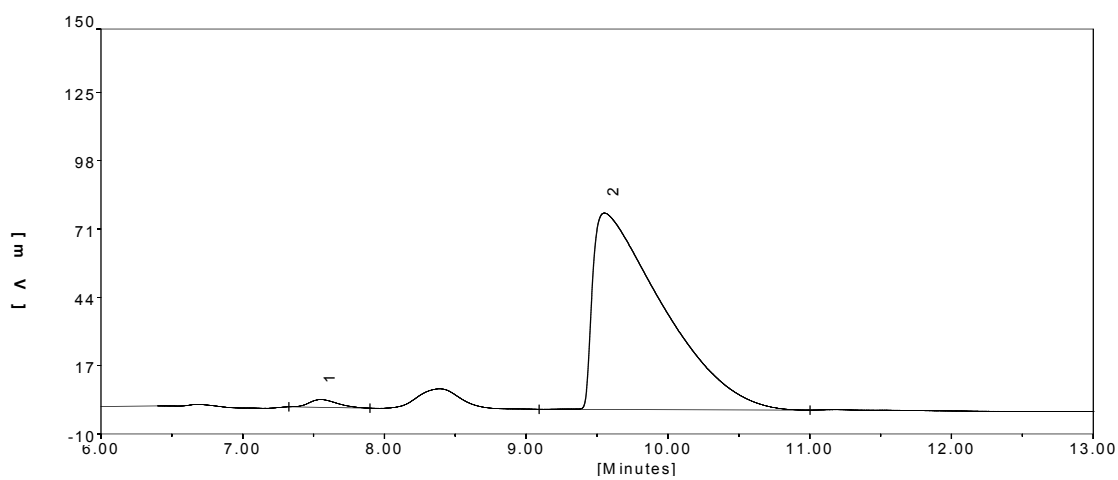

| # | Ret Time (min) | Height (mV) | Area (mV.sec) | Area (%) |
|---|----------------|-------------|---------------|----------|
| 1 | 7.55083        | 3.08        | 42.07         | 1.5548   |
| 2 | 9.55250        | 77.63       | 2663.81       | 98.4452  |

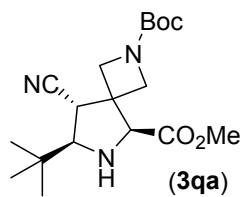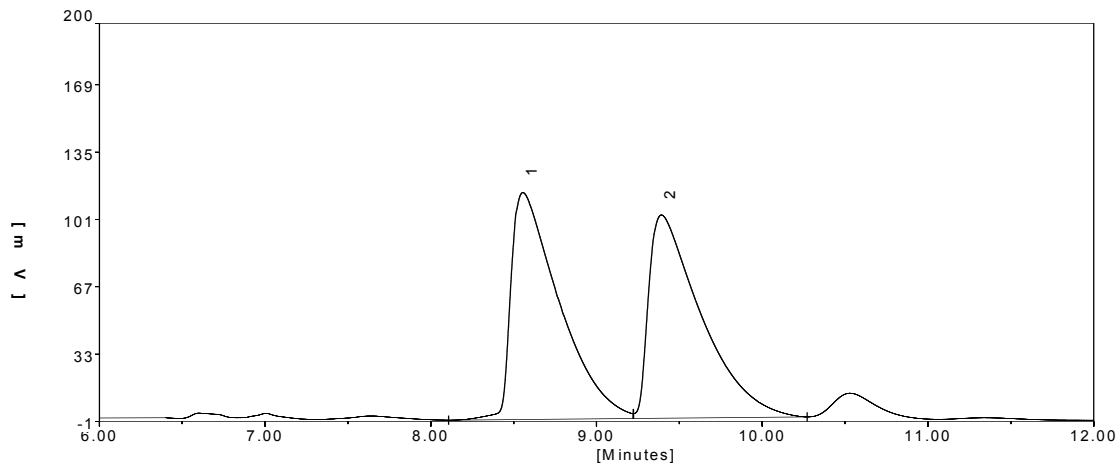

| # | Ret Time (min) | Height (mV) | Area (mV.sec) | Area (%) |
|---|----------------|-------------|---------------|----------|
| 1 | 8.55583        | 114.61      | 2328.06       | 50.8149  |
| 2 | 9.39167        | 102.65      | 2253.39       | 49.1851  |

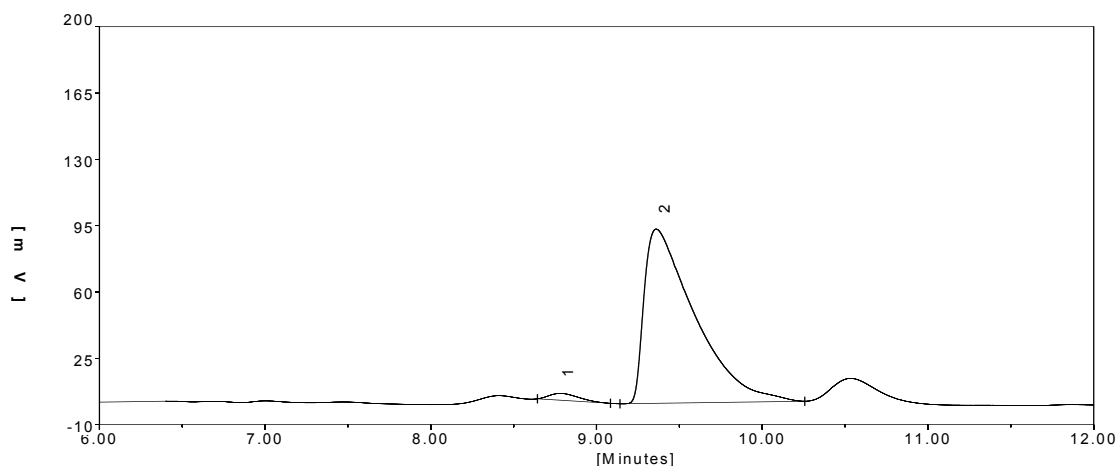

| # | Ret Time (min) | Height (mV) | Area (mV.sec) | Area (%) |
|---|----------------|-------------|---------------|----------|
| 1 | 8.77500        | 3.58        | 44.41         | 2.2264   |
| 2 | 9.36000        | 91.93       | 1950.45       | 97.7736  |

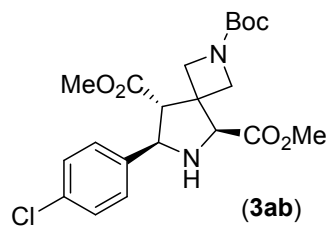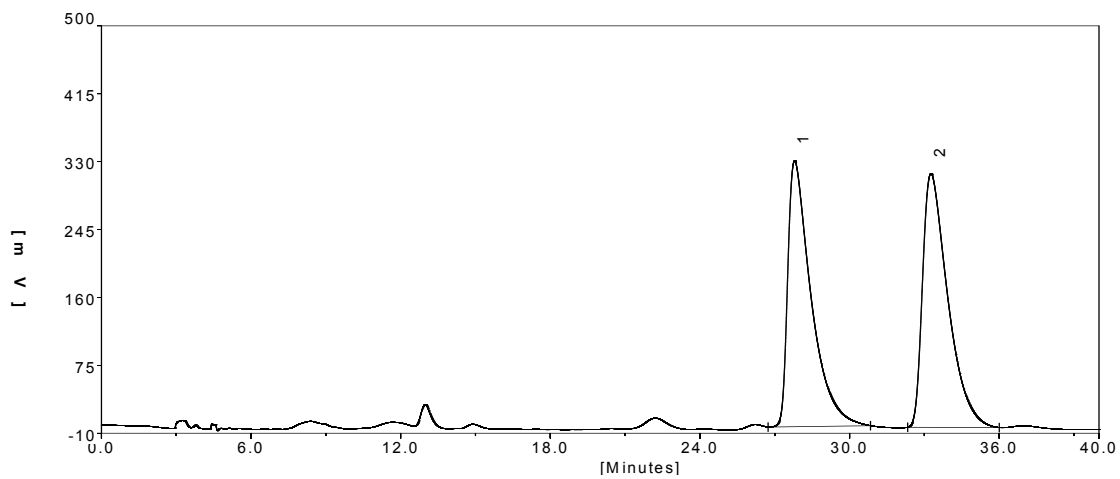

| # | Ret Time (min) | Height (mV) | Area (mV.sec) | Area (%) |
|---|----------------|-------------|---------------|----------|
| 1 | 27.79500       | 333.01      | 21595.62      | 49.2048  |
| 2 | 33.26500       | 317.86      | 22293.65      | 50.7952  |

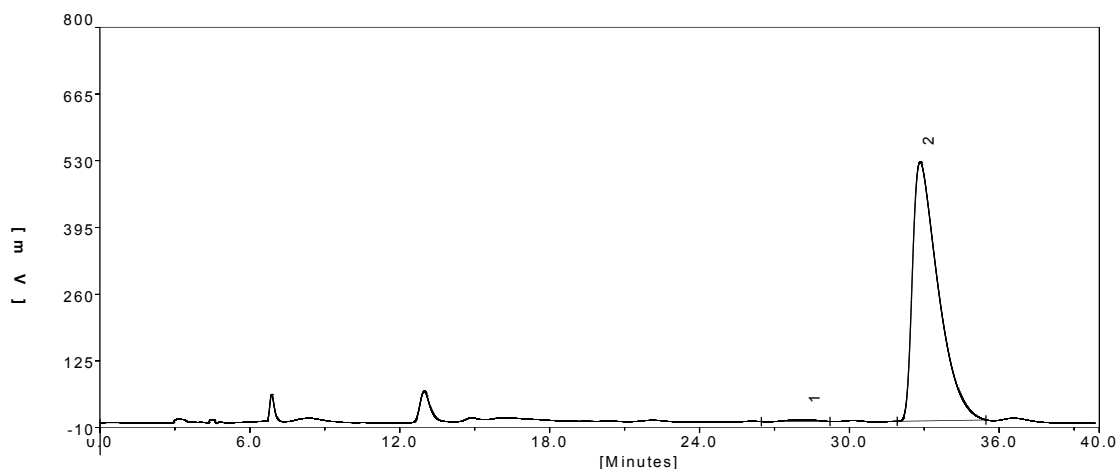

| # | Ret Time (min) | Height (mV) | Area (mV.sec) | Area (%) |
|---|----------------|-------------|---------------|----------|
| 1 | 28.26083       | 3.71        | 285.79        | 0.7623   |
| 2 | 32.82833       | 524.58      | 37203.91      | 99.2377  |



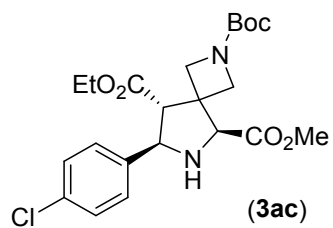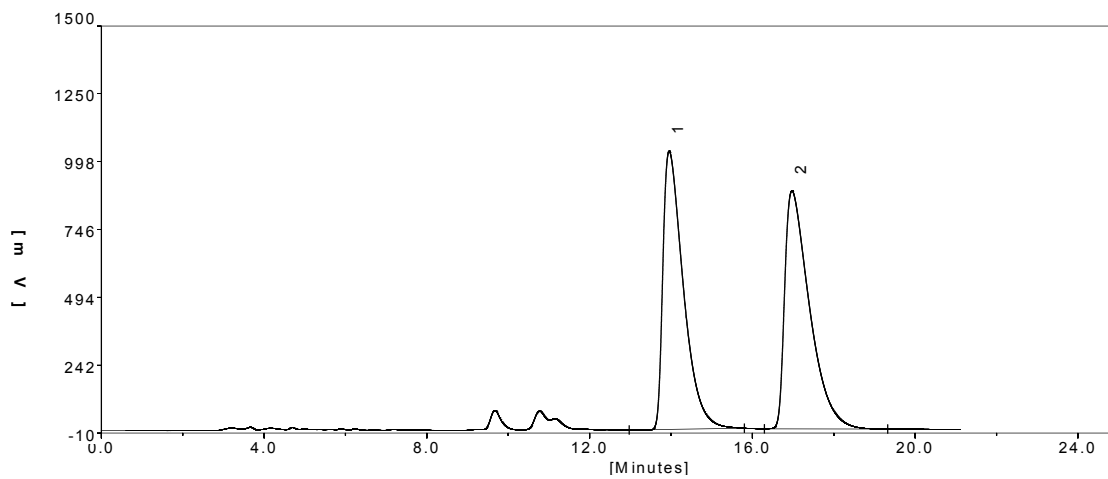

| # | Ret Time (min) | Height (mV) | Area (mV.sec) | Area (%) |
|---|----------------|-------------|---------------|----------|
| 1 | 13.98583       | 1032.73     | 36000.81      | 49.0847  |
| 2 | 17.00333       | 883.54      | 37343.50      | 50.9153  |

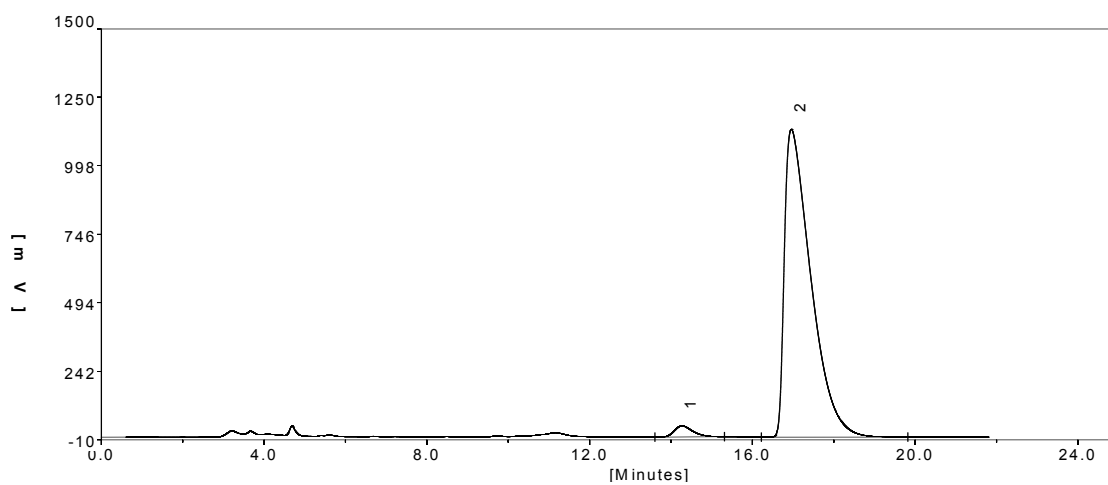

| # | Ret Time (min) | Height (mV) | Area (mV.sec) | Area (%) |
|---|----------------|-------------|---------------|----------|
| 1 | 14.29000       | 40.87       | 1286.32       | 2.4641   |
| 2 | 16.98833       | 1131.50     | 50916.47      | 97.5359  |

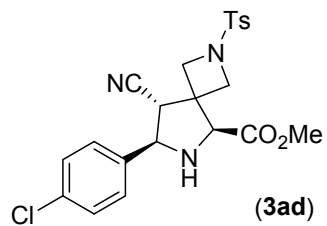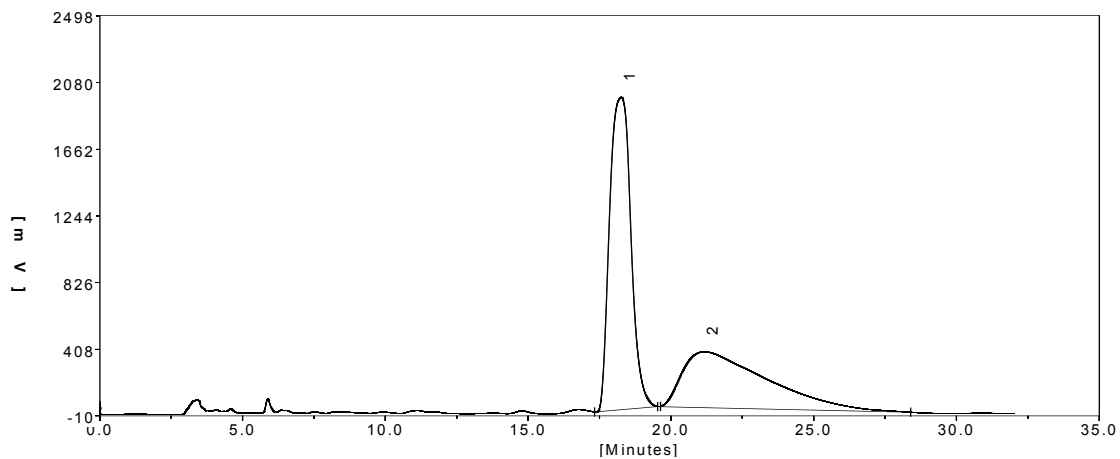

| # | Ret Time (min) | Height (mV) | Area (mV.sec) | Area (%) |
|---|----------------|-------------|---------------|----------|
| 1 | 18.24500       | 1959.54     | 101429.15     | 58.4469  |
| 2 | 21.15750       | 350.58      | 72111.46      | 41.5531  |

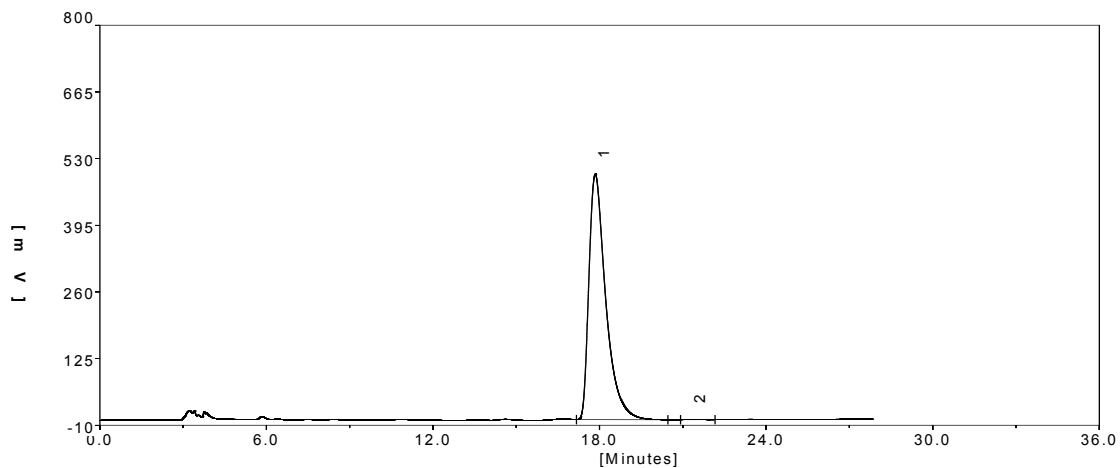

| # | Ret Time (min) | Height (mV) | Area (mV.sec) | Area (%) |
|---|----------------|-------------|---------------|----------|
| 1 | 17.84667       | 497.32      | 20947.34      | 99.9850  |
| 2 | 21.30917       | 0.16        | 3.14          | 0.0150   |

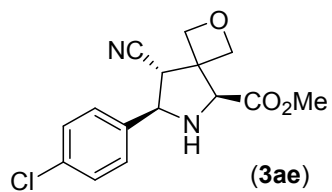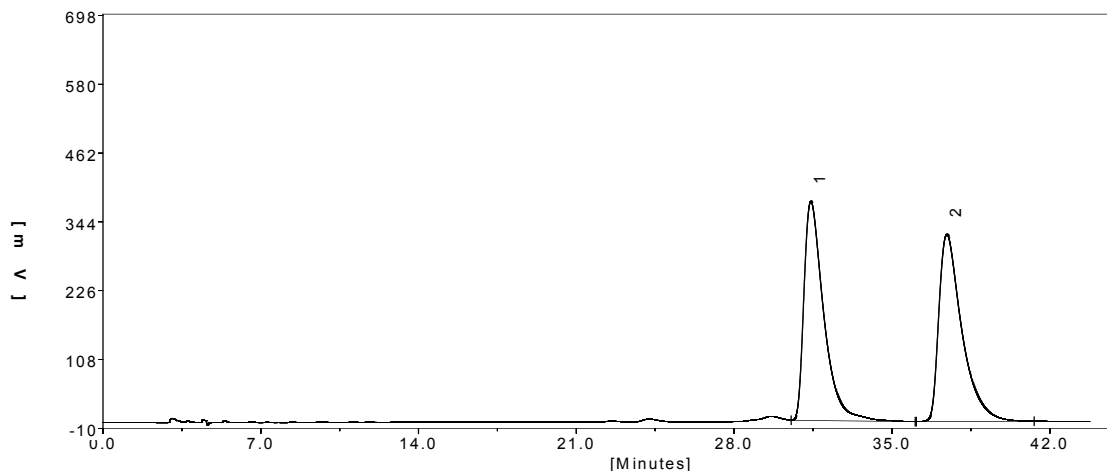

| # | Ret Time (min) | Height (mV) | Area (mV.sec) | Area (%) |
|---|----------------|-------------|---------------|----------|
| 1 | 31.40333       | 375.84      | 22894.99      | 50.2053  |
| 2 | 37.43583       | 321.07      | 22707.74      | 49.7947  |

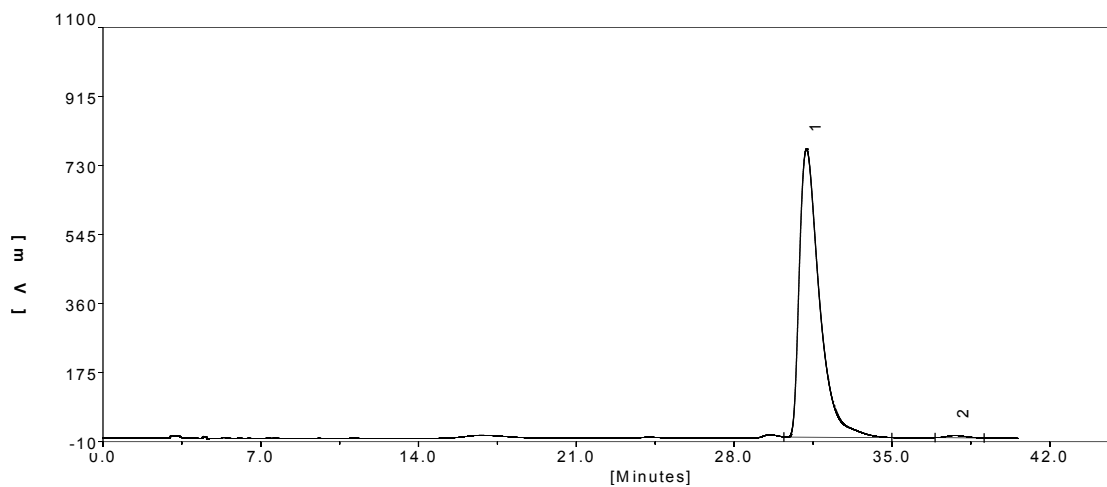

| # | Ret Time (min) | Height (mV) | Area (mV.sec) | Area (%) |
|---|----------------|-------------|---------------|----------|
| 1 | 31.21000       | 772.62      | 47410.28      | 99.2708  |
| 2 | 37.76250       | 6.02        | 348.25        | 0.7292   |

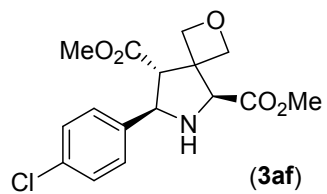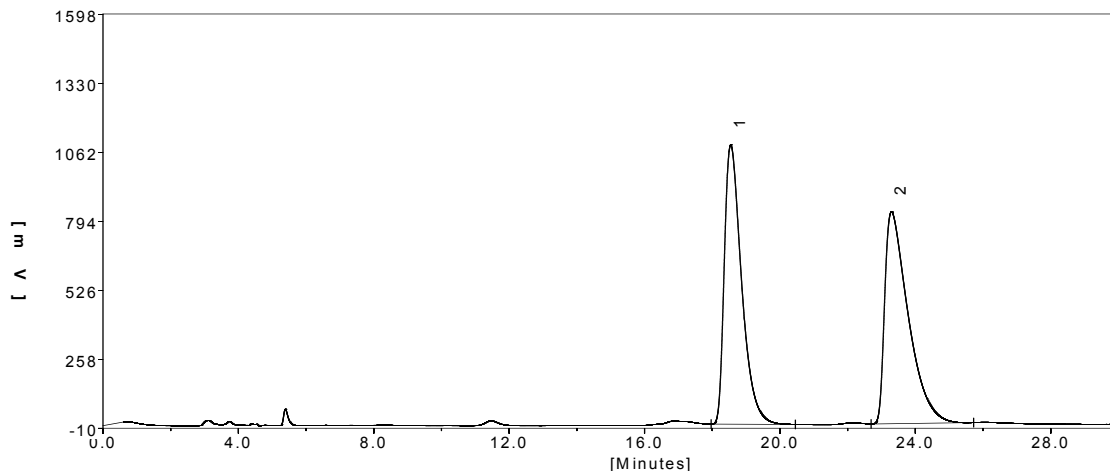

| # | Ret Time (min) | Height (mV) | Area (mV.sec) | Area (%) |
|---|----------------|-------------|---------------|----------|
| 1 | 18.57750       | 1085.74     | 38458.73      | 49.2855  |
| 2 | 23.32750       | 823.87      | 39573.88      | 50.7145  |

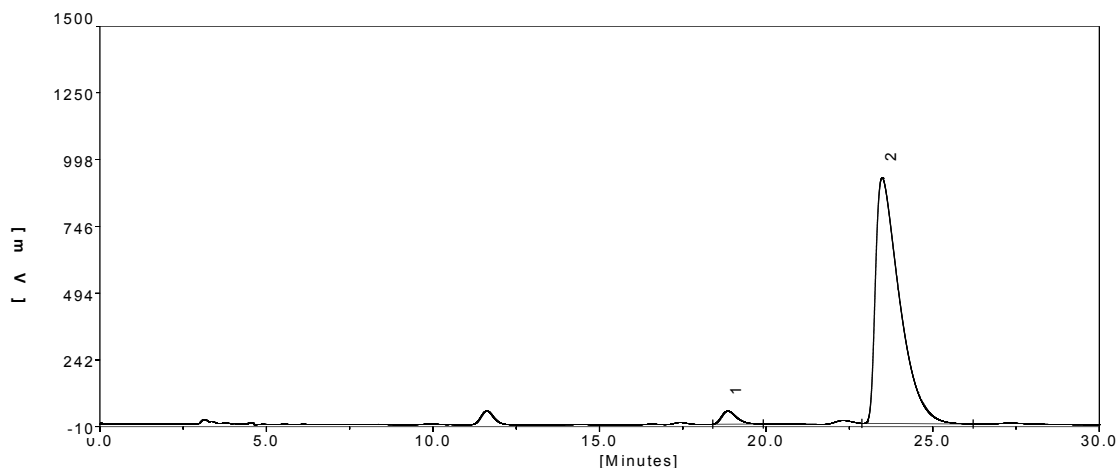

| # | Ret Time (min) | Height (mV) | Area (mV.sec) | Area (%) |
|---|----------------|-------------|---------------|----------|
| 1 | 18.84000       | 49.41       | 1524.40       | 3.1958   |
| 2 | 23.48333       | 927.64      | 46175.09      | 96.8042  |

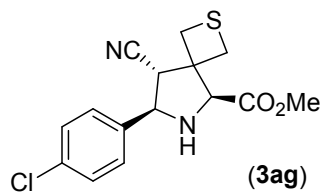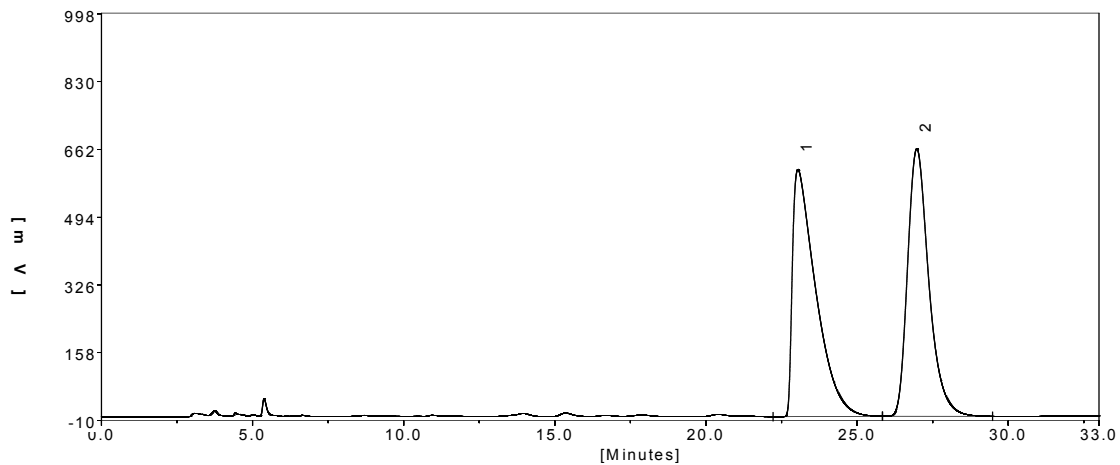

| # | Ret Time (min) | Height (mV) | Area (mV.sec) | Area (%) |
|---|----------------|-------------|---------------|----------|
| 1 | 23.04167       | 613.23      | 32789.51      | 50.3249  |
| 2 | 26.97583       | 663.55      | 32366.09      | 49.6751  |

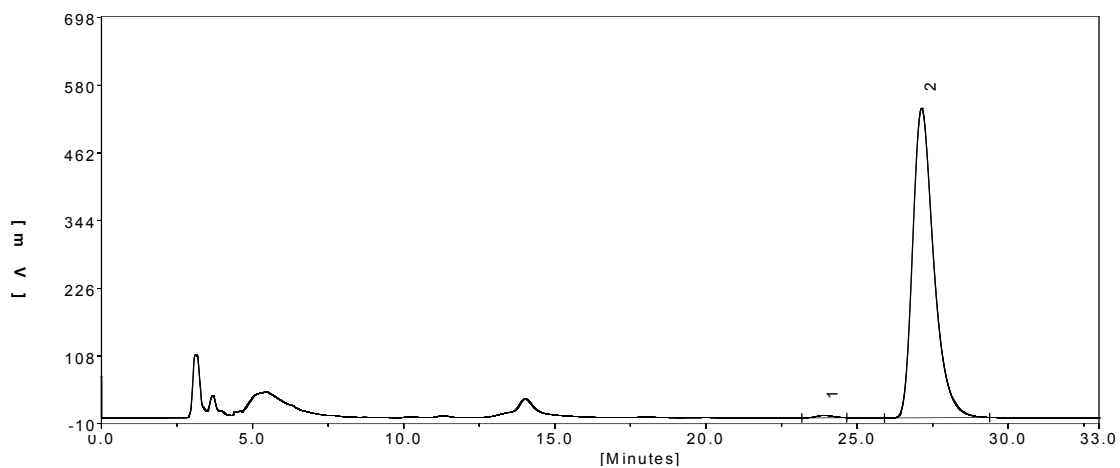

| # | Ret Time (min) | Height (mV) | Area (mV.sec) | Area (%) |
|---|----------------|-------------|---------------|----------|
| 1 | 23.89083       | 4.25        | 163.16        | 0.6219   |
| 2 | 27.13750       | 539.58      | 26071.39      | 99.3781  |

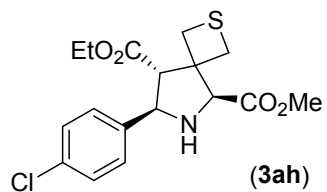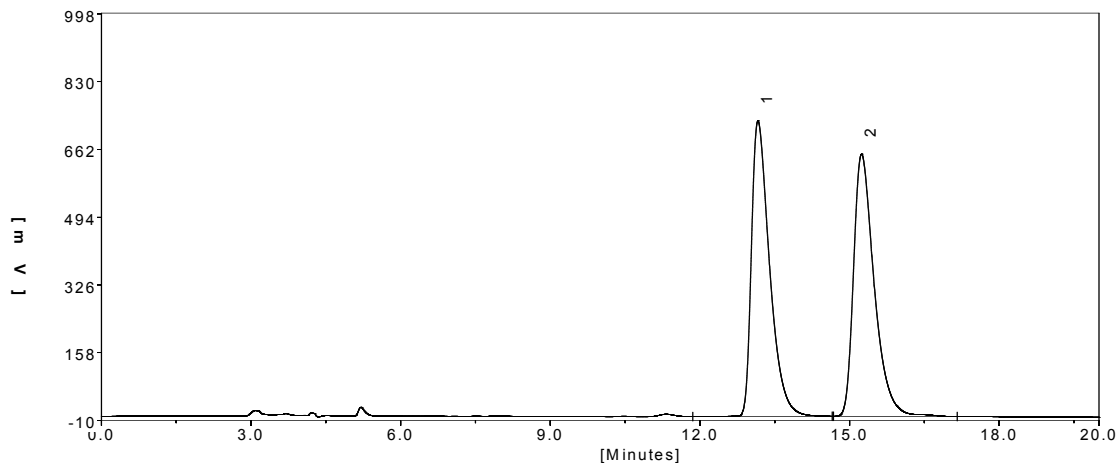

| # | Ret Time (min) | Height (mV) | Area (mV.sec) | Area (%) |
|---|----------------|-------------|---------------|----------|
| 1 | 13.16417       | 733.05      | 18516.86      | 49.7579  |
| 2 | 15.24167       | 650.39      | 18697.03      | 50.2421  |

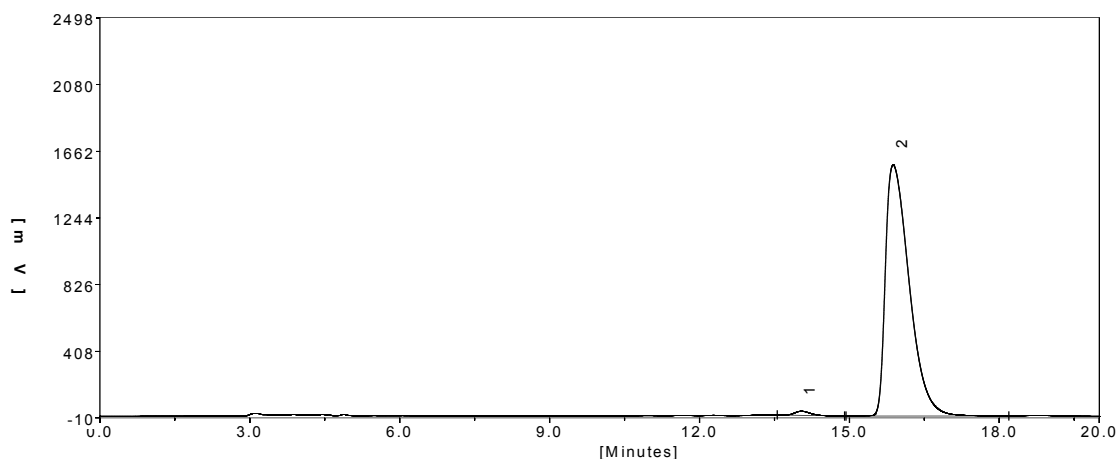

| # | Ret Time (min) | Height (mV) | Area (mV.sec) | Area (%) |
|---|----------------|-------------|---------------|----------|
| 1 | 14.03000       | 26.09       | 536.81        | 1.0232   |
| 2 | 15.87583       | 1574.45     | 51928.11      | 98.9768  |

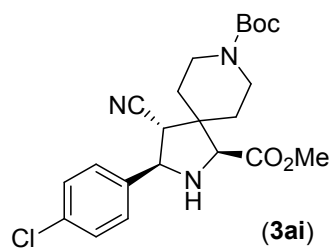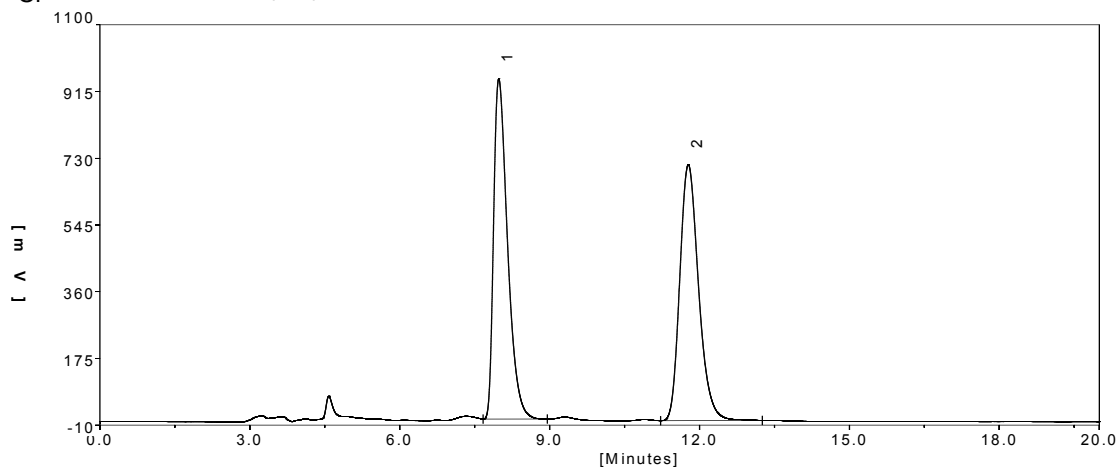

| # | Ret Time (min) | Height (mV) | Area (mV.sec) | Area (%) |
|---|----------------|-------------|---------------|----------|
| 1 | 7.98167        | 943.48      | 18297.42      | 49.6913  |
| 2 | 11.77667       | 709.94      | 18524.78      | 50.3087  |

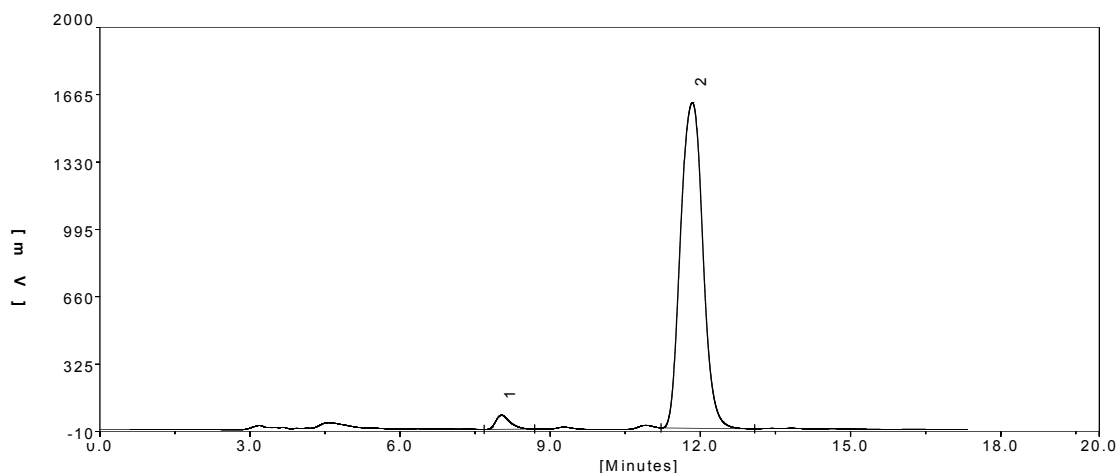

| # | Ret Time (min) | Height (mV) | Area (mV.sec) | Area (%) |
|---|----------------|-------------|---------------|----------|
| 1 | 8.05083        | 70.66       | 1374.90       | 2.6763   |
| 2 | 11.86833       | 1619.23     | 49998.18      | 97.3237  |

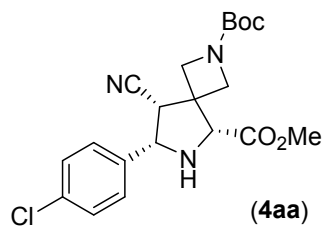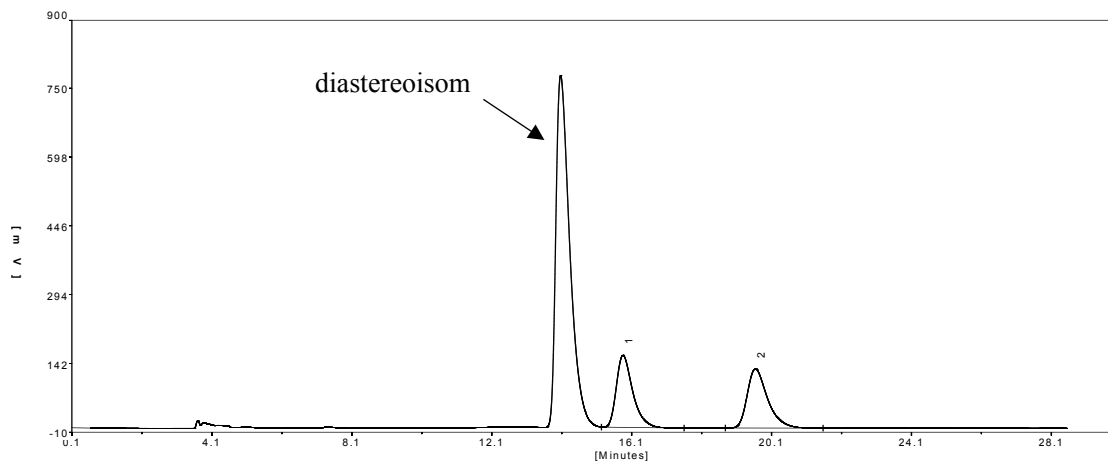

| # | Ret Time (min) | Height (mV) | Area (mV.sec) | Area (%) |
|---|----------------|-------------|---------------|----------|
| 1 | 15.85583       | 159.38      | 5164.50       | 49.5286  |
| 2 | 19.64083       | 130.76      | 5262.82       | 50.4714  |

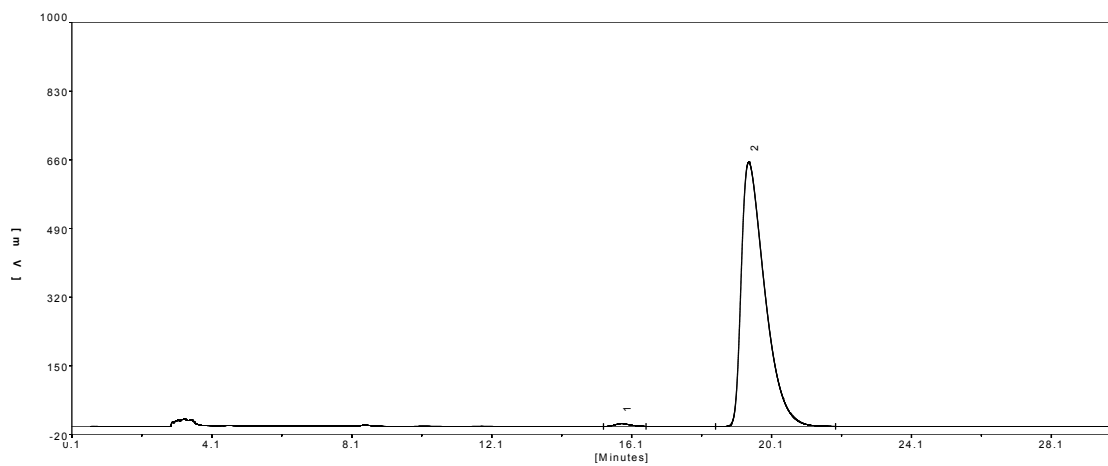

| # | Ret Time (min) | Height (mV) | Area (mV.sec) | Area (%) |
|---|----------------|-------------|---------------|----------|
| 1 | 15.80583       | 6.82        | 204.89        | 0.6719   |
| 2 | 19.44917       | 654.49      | 30290.57      | 99.3281  |



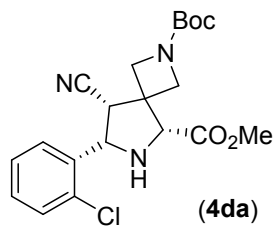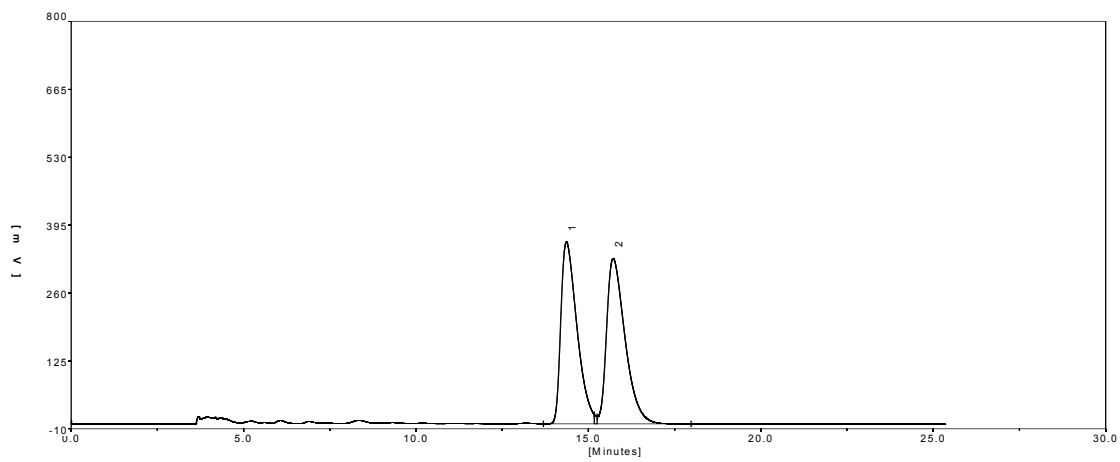

| # | Ret Time (min) | Height (mV) | Area (mV.sec) | Area (%) |
|---|----------------|-------------|---------------|----------|
| 1 | 14.36417       | 361.40      | 11798.68      | 48.9093  |
| 2 | 15.72083       | 329.09      | 12324.90      | 51.0907  |

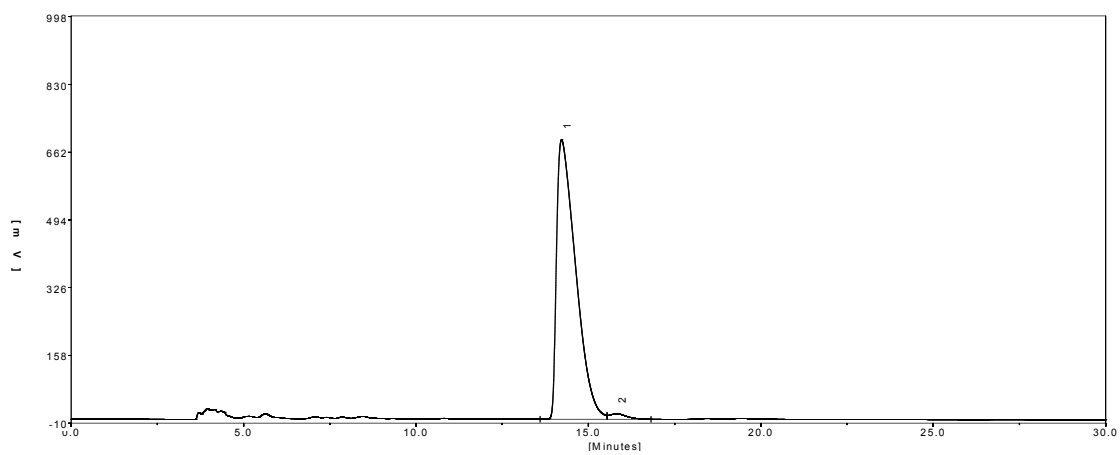

| # | Ret Time (min) | Height (mV) | Area (mV.sec) | Area (%) |
|---|----------------|-------------|---------------|----------|
| 1 | 14.22250       | 693.28      | 26633.60      | 98.2623  |
| 2 | 15.82000       | 13.76       | 471.01        | 1.7377   |

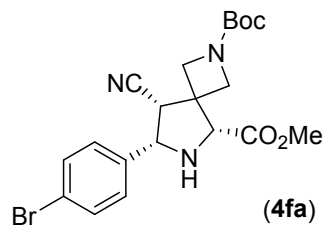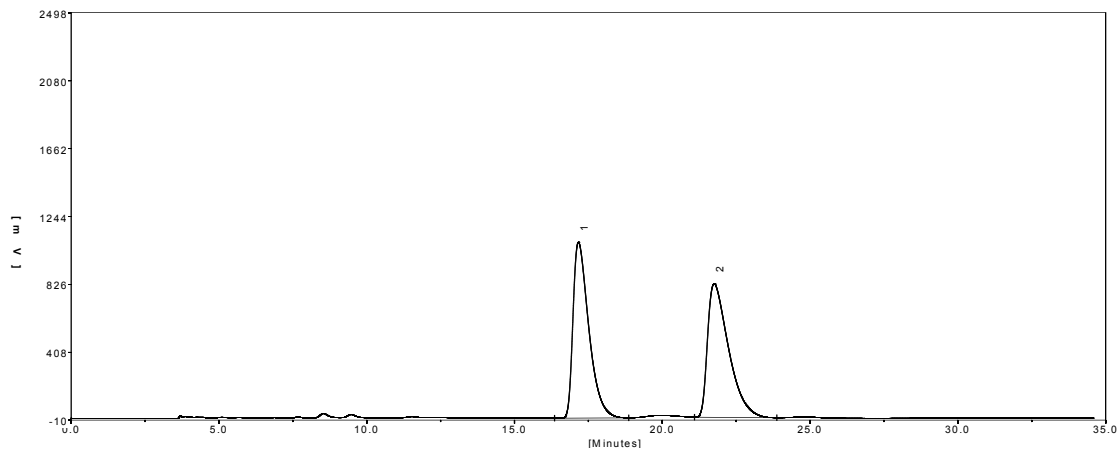

| # | Ret Time (min) | Height (mV) | Area (mV.sec) | Area (%) |
|---|----------------|-------------|---------------|----------|
| 1 | 17.16417       | 1083.85     | 40191.15      | 49.7581  |
| 2 | 21.75667       | 823.43      | 40582.00      | 50.2419  |

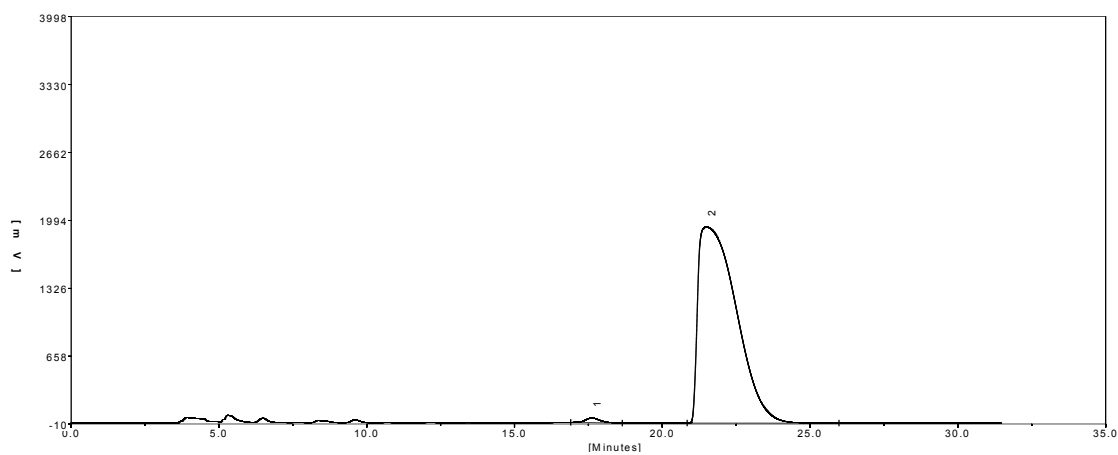

| # | Ret Time (min) | Height (mV) | Area (mV.sec) | Area (%) |
|---|----------------|-------------|---------------|----------|
| 1 | 17.60917       | 46.23       | 1568.65       | 0.9005   |
| 2 | 21.48250       | 1930.45     | 172631.65     | 99.0995  |

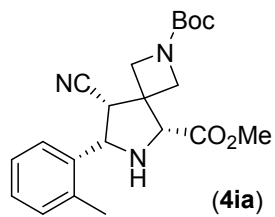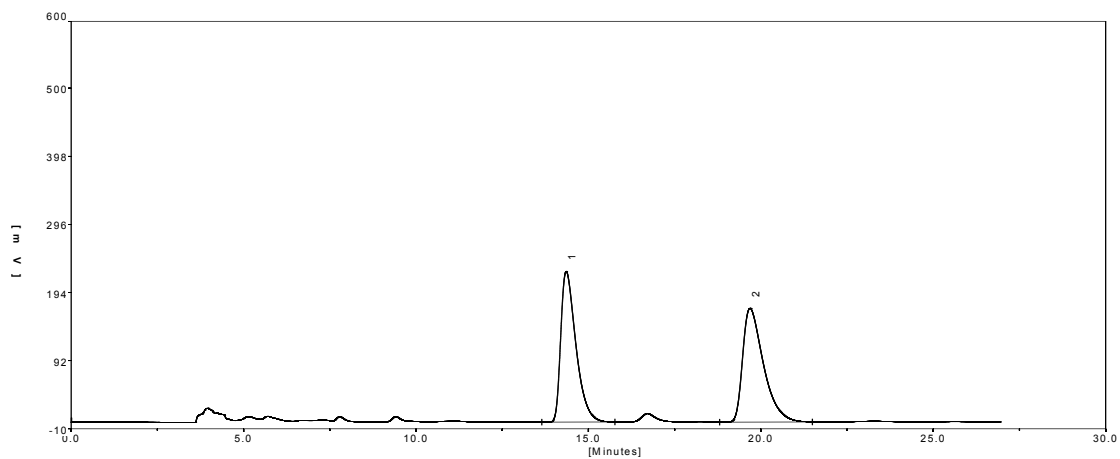

| # | Ret Time (min) | Height (mV) | Area (mV.sec) | Area (%) |
|---|----------------|-------------|---------------|----------|
| 1 | 14.35750       | 225.70      | 6877.22       | 49.1475  |
| 2 | 19.68833       | 170.42      | 7115.81       | 50.8525  |

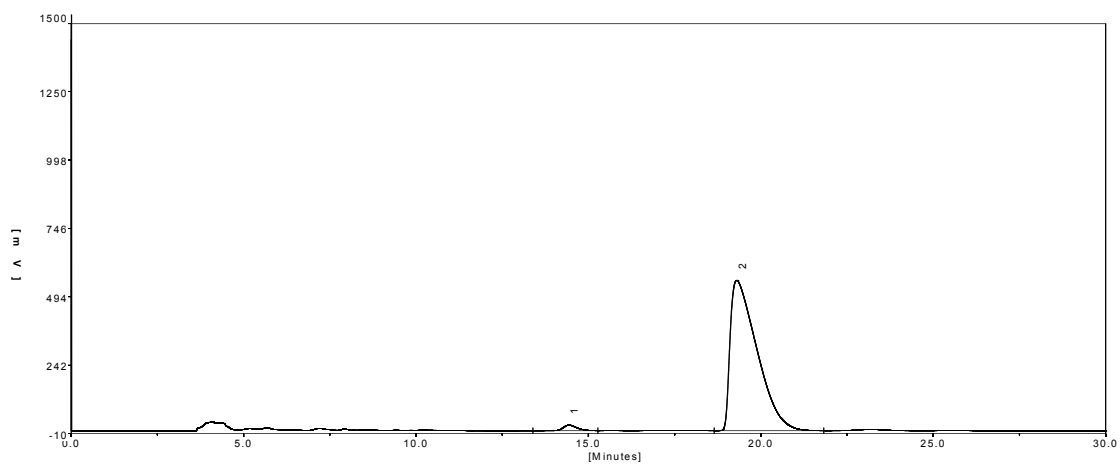

| # | Ret Time (min) | Height (mV) | Area (mV.sec) | Area (%) |
|---|----------------|-------------|---------------|----------|
| 1 | 14.42750       | 20.71       | 566.13        | 1.8649   |
| 2 | 19.30250       | 554.13      | 29791.59      | 98.1351  |

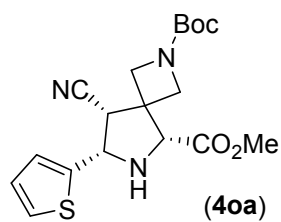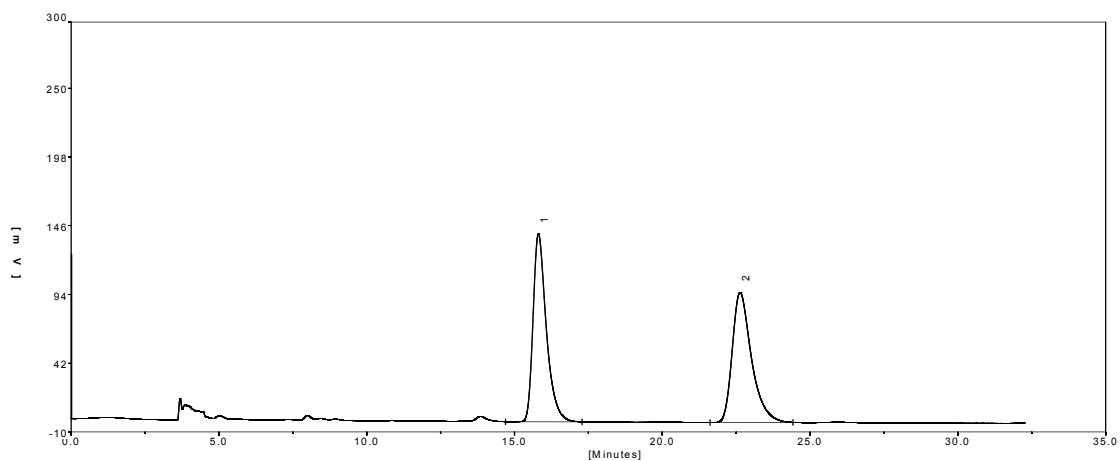

| # | Ret Time (min) | Height (mV) | Area (mV.sec) | Area (%) |
|---|----------------|-------------|---------------|----------|
| 1 | 15.81083       | 142.15      | 4441.21       | 49.9880  |
| 2 | 22.63000       | 98.44       | 4443.34       | 50.0120  |

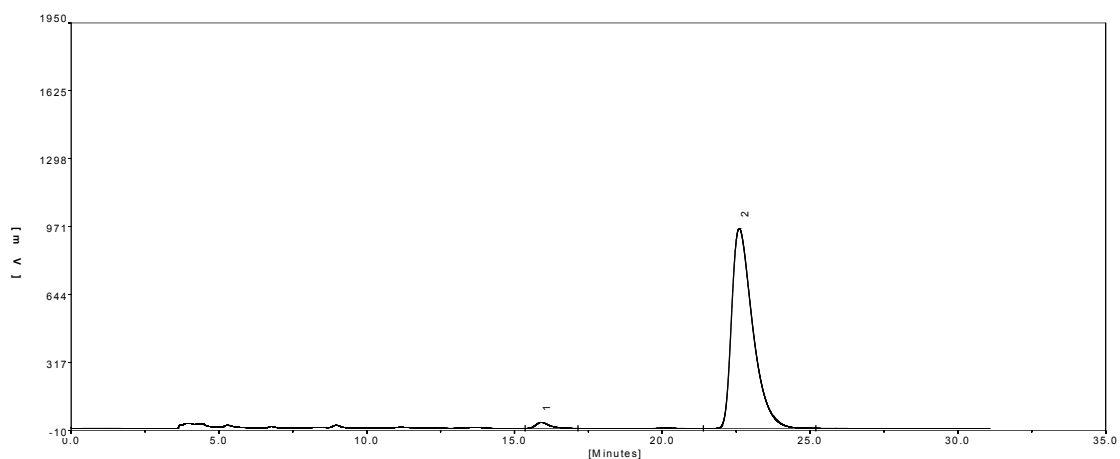

| # | Ret Time (min) | Height (mV) | Area (mV.sec) | Area (%) |
|---|----------------|-------------|---------------|----------|
| 1 | 15.89083       | 28.90       | 923.30        | 1.9141   |
| 2 | 22.60500       | 962.15      | 47313.86      | 98.0859  |

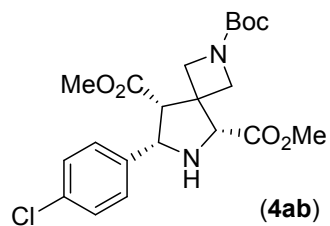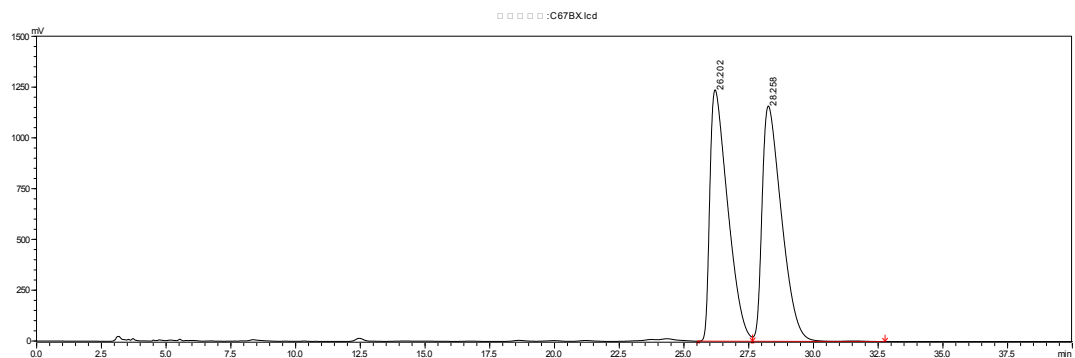

| # | Ret Time (min) | Height (mV) | Area (mV.sec) | Area (%) |
|---|----------------|-------------|---------------|----------|
| 1 | 26.202         | 1237.84     | 59407.12      | 49.553   |
| 2 | 28.258         | 1158.74     | 60479.52      | 50.447   |

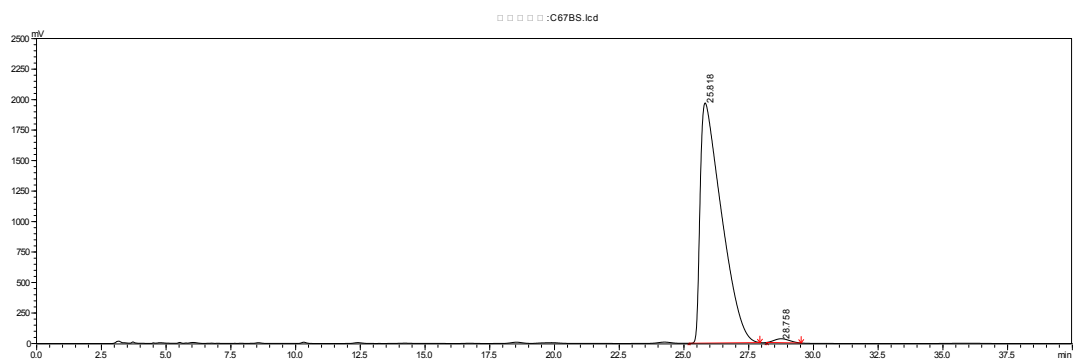

| # | Ret Time (min) | Height (mV) | Area (mV.sec) | Area (%) |
|---|----------------|-------------|---------------|----------|
| 1 | 25.818         | 1969.37     | 112994.68     | 98.870   |
| 2 | 28.758         | 32.13       | 1291.94       | 1.130    |

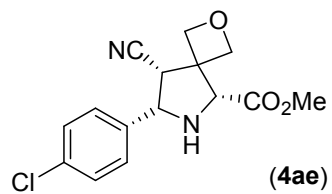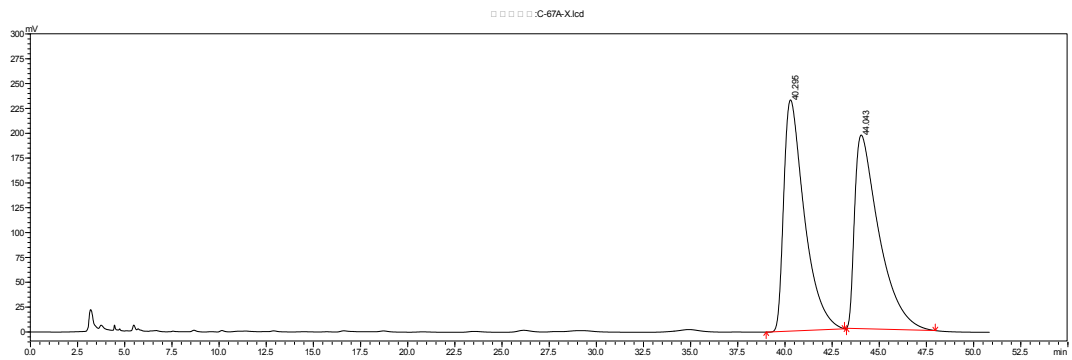

| # | Ret Time (min) | Height (mV) | Area (mV.sec) | Area (%) |
|---|----------------|-------------|---------------|----------|
| 1 | 40.295         | 232.73      | 17716.12      | 50.313   |
| 2 | 44.043         | 194.92      | 17496.03      | 49.687   |

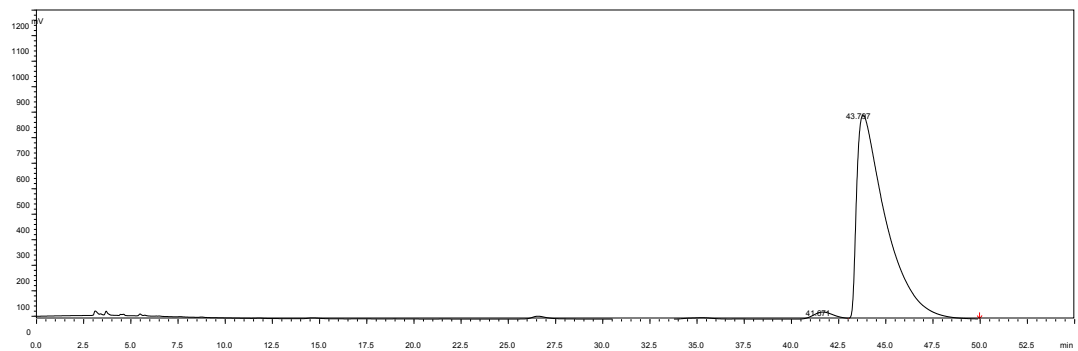

| # | Ret Time (min) | Height (mV) | Area (mV.sec) | Area (%) |
|---|----------------|-------------|---------------|----------|
| 1 | 41.671         | 27.27       | 2083.99       | 2.375    |
| 2 | 43.797         | 800.09      | 85659.71      | 97.625   |

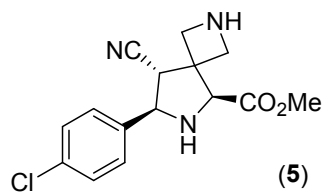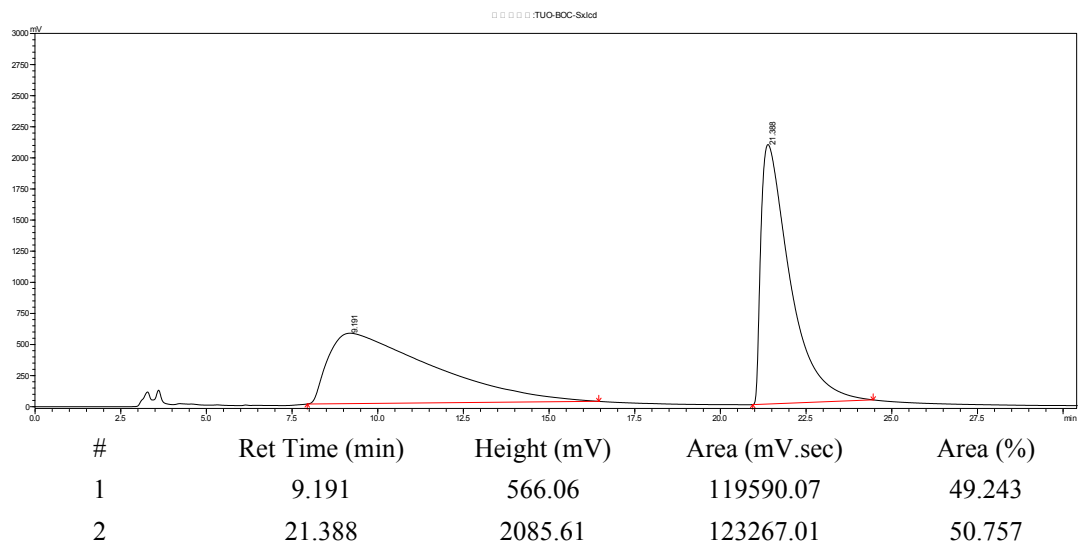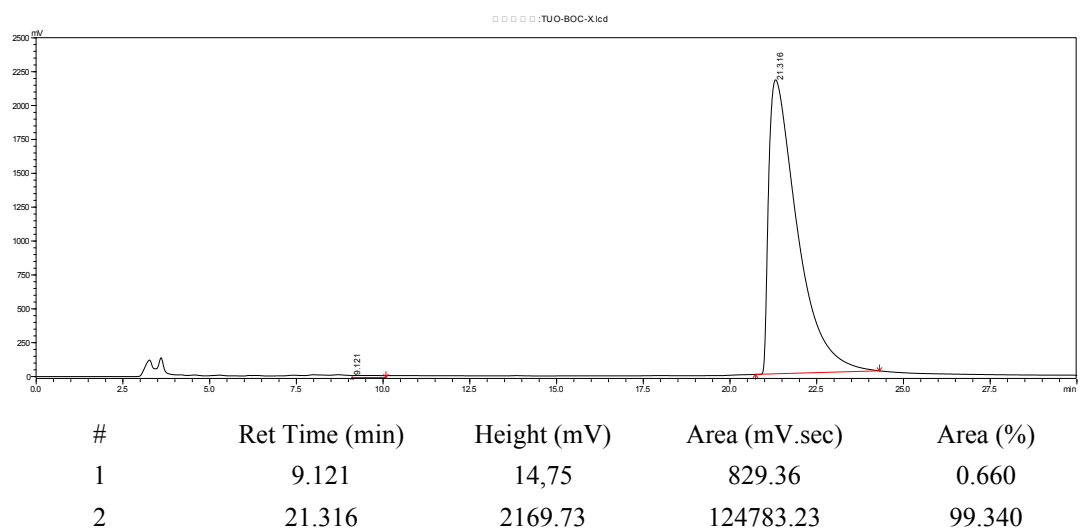

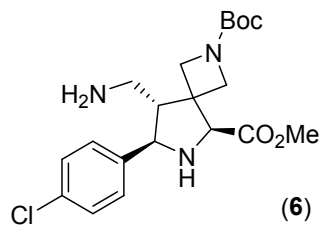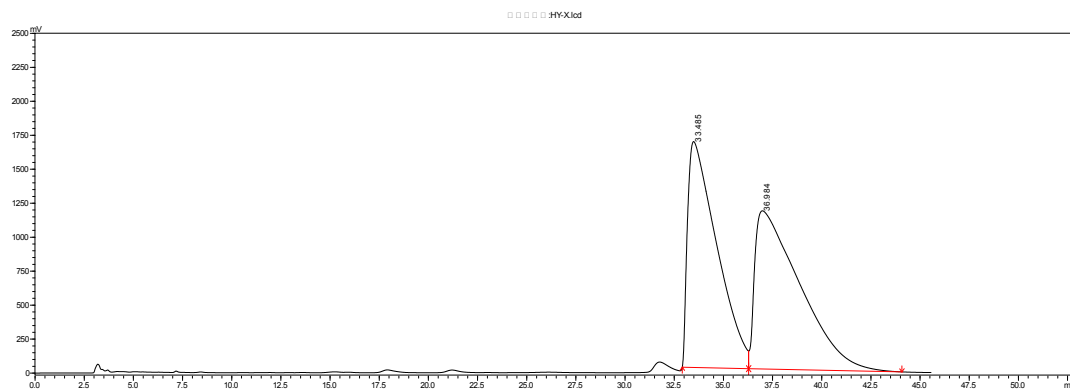

| # | Ret Time (min) | Height (mV) | Area (mV.sec) | Area (%) |
|---|----------------|-------------|---------------|----------|
| 1 | 33.485         | 1662.52     | 171523.78     | 47.948   |
| 2 | 36.984         | 1163.49     | 186205.93     | 52.052   |

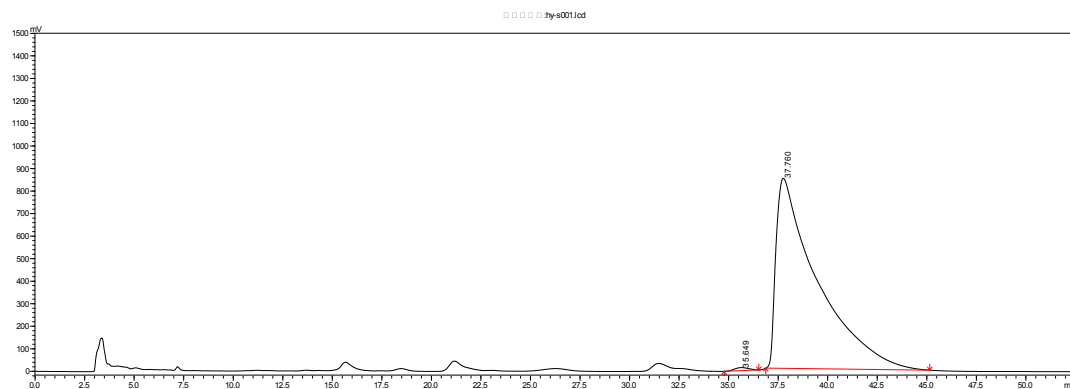

| # | Ret Time (min) | Height (mV) | Area (mV.sec) | Area (%) |
|---|----------------|-------------|---------------|----------|
| 1 | 35.649         | 13.50       | 676.13        | 0.549    |
| 2 | 37.760         | 843.18      | 122377.18     | 99.451   |



# $^1\text{H}$ NMR and $^{13}\text{C}$ NMR spectra

$^1\text{H}$  NMR spectrum of compound **3aa** ( $\text{CDCl}_3$ )

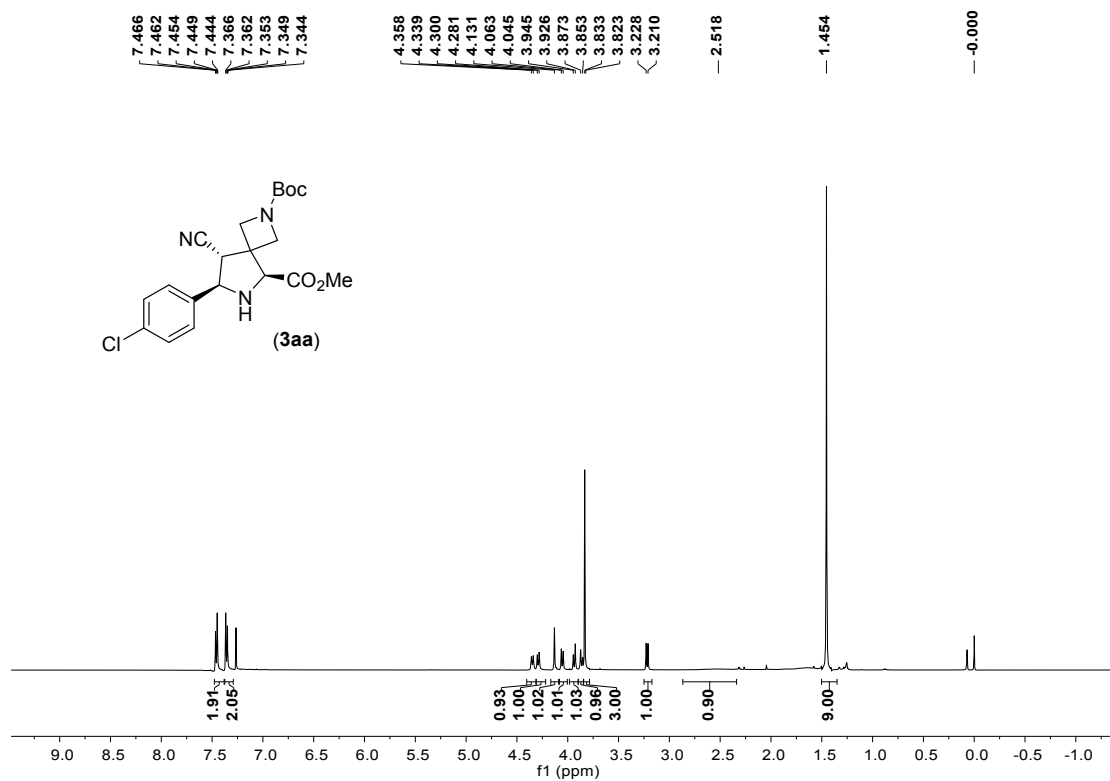

$^{13}\text{C}$  NMR spectrum of compound **3aa** ( $\text{CDCl}_3$ )

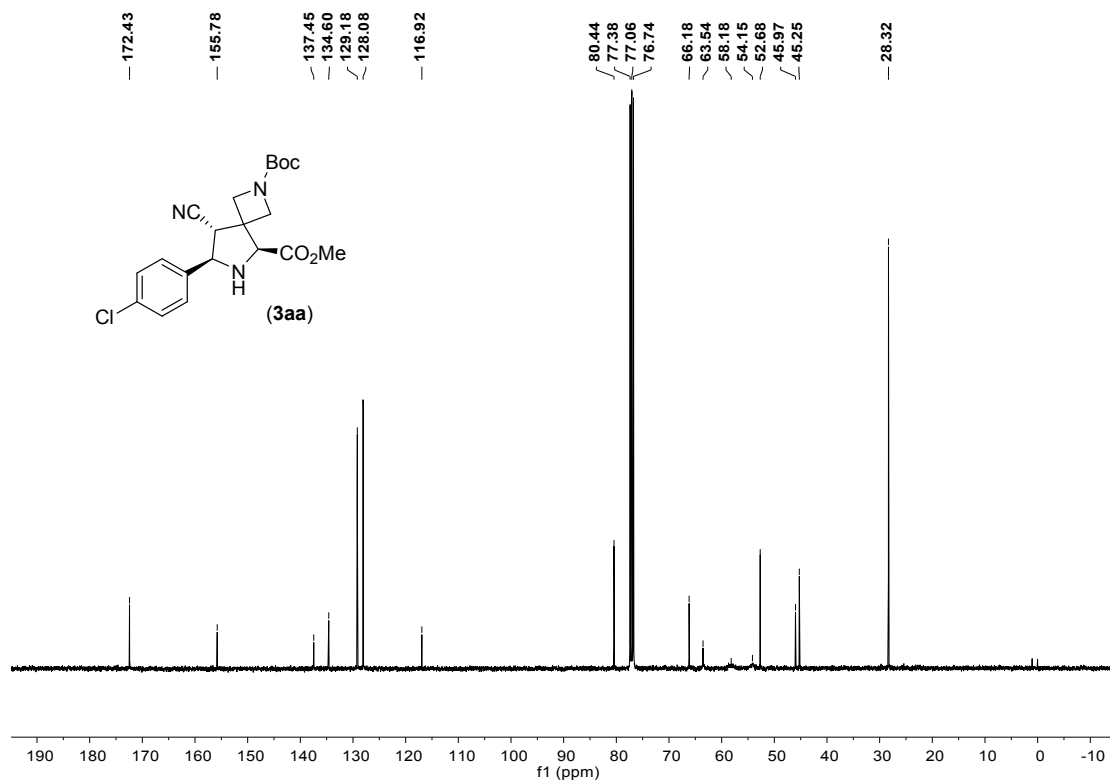

<sup>1</sup>H NMR spectrum of compound **3ba** (CDCl<sub>3</sub>)

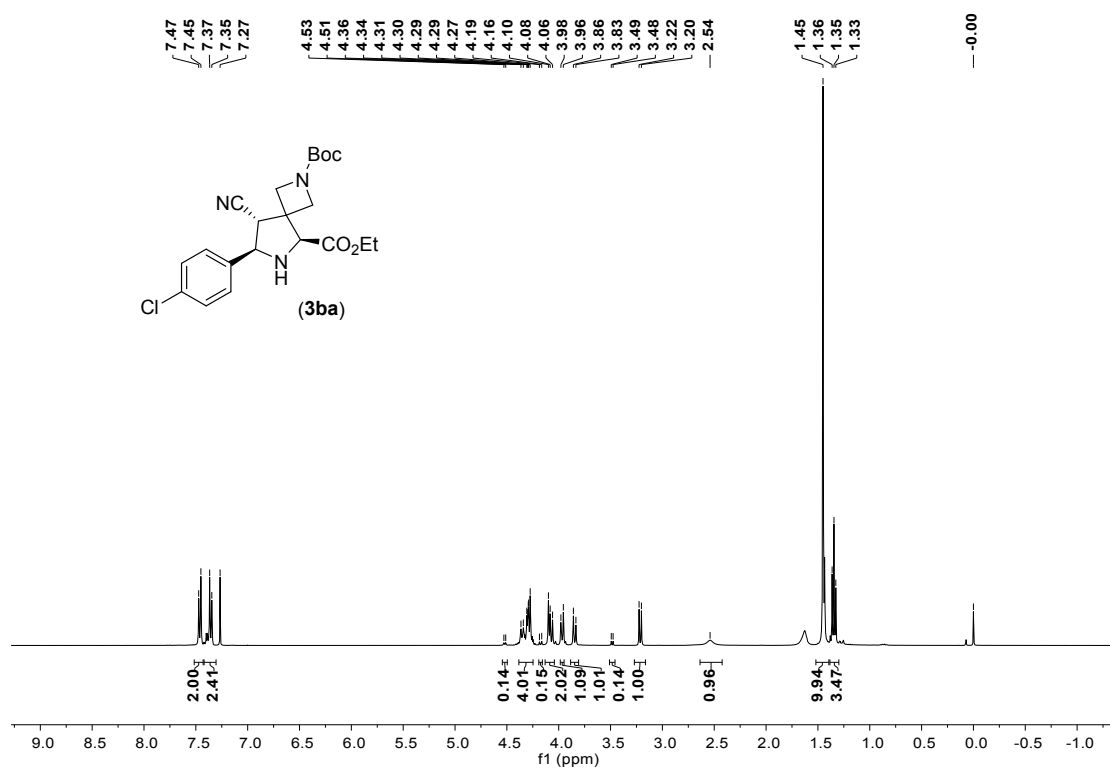

<sup>13</sup>C NMR spectrum of compound **3ba** (CDCl<sub>3</sub>)

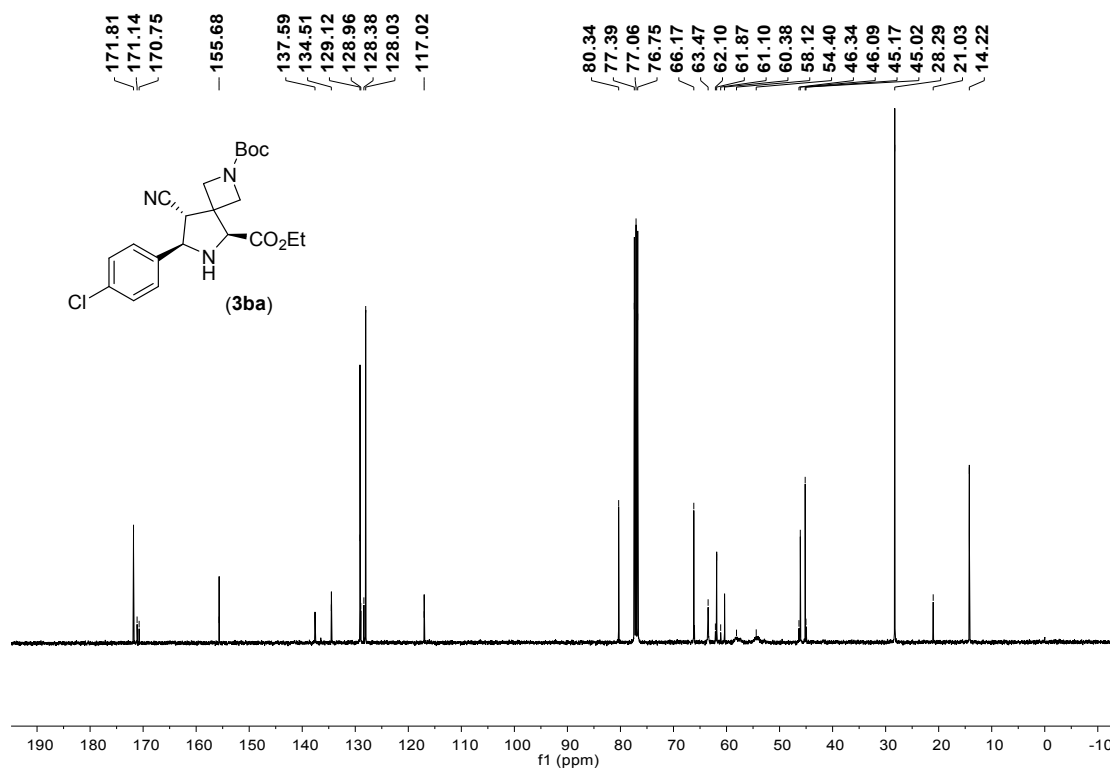

<sup>1</sup>H NMR spectrum of compound **3ca** (CDCl<sub>3</sub>)

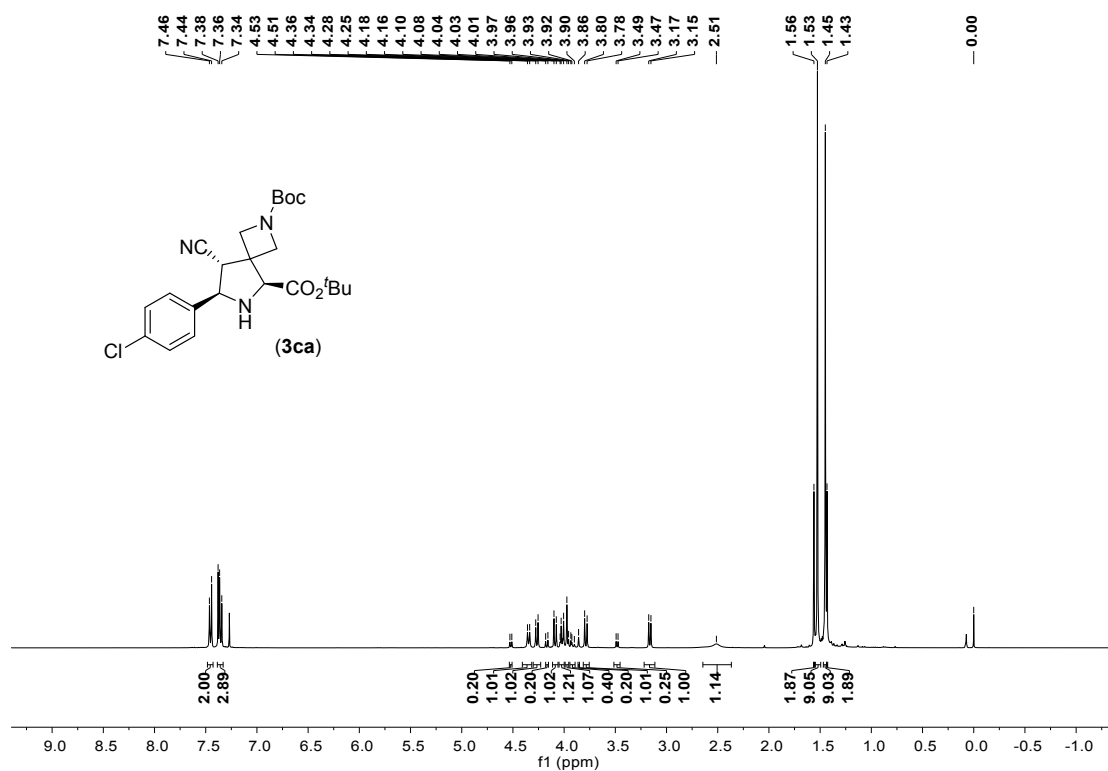

<sup>13</sup>C NMR spectrum of compound **3ca** (CDCl<sub>3</sub>)

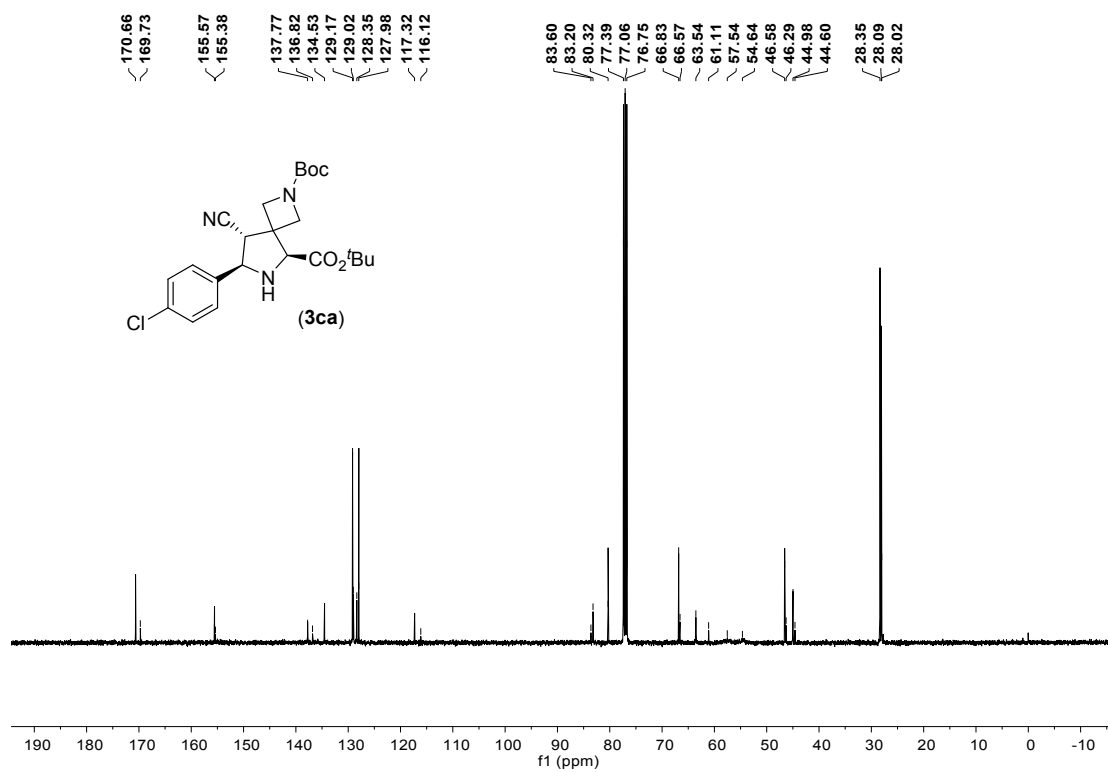

<sup>1</sup>H NMR spectrum of compound **3da** (CDCl<sub>3</sub>)

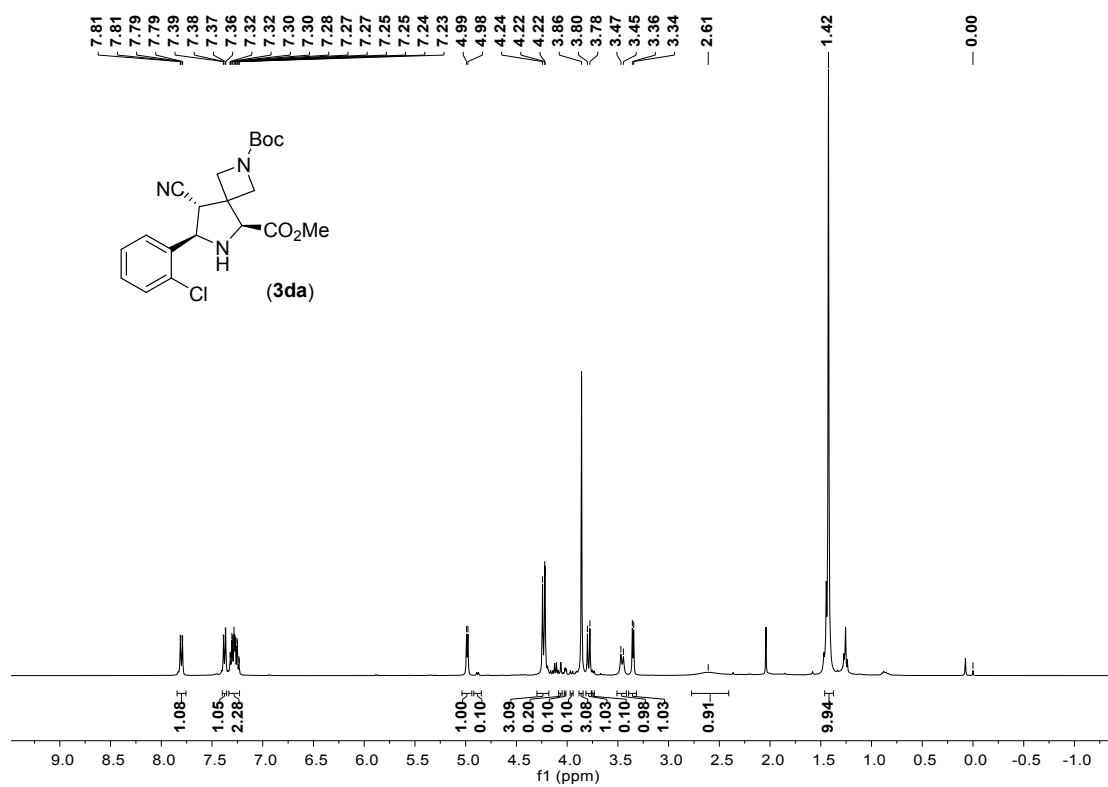

<sup>13</sup>C NMR spectrum of compound **3da** (CDCl<sub>3</sub>)

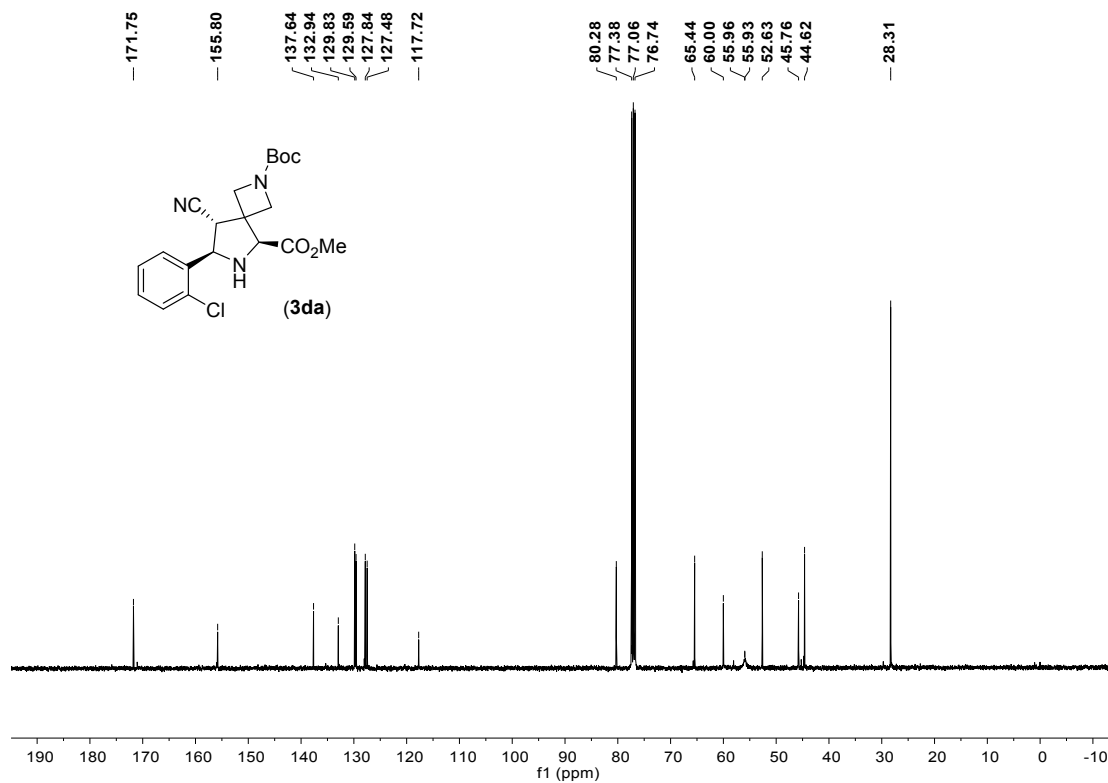

<sup>1</sup>H NMR spectrum of compound **3ea** (CDCl<sub>3</sub>)

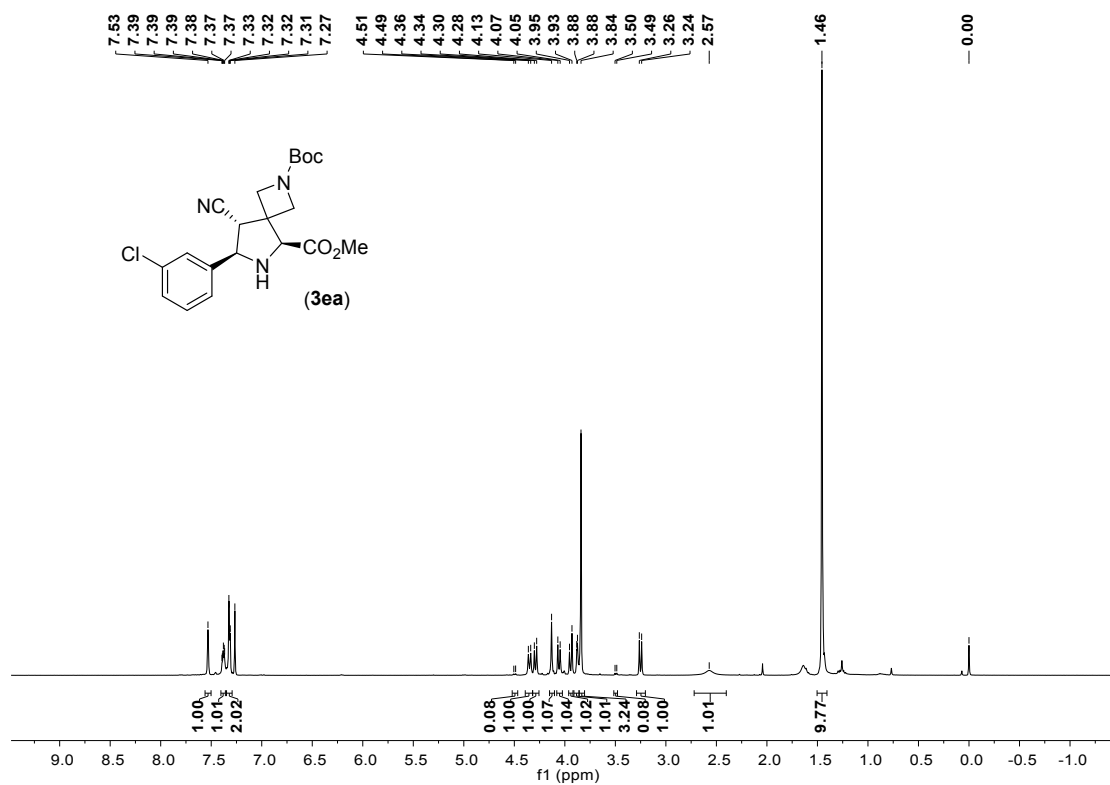

<sup>13</sup>C NMR spectrum of compound **3ea** (CDCl<sub>3</sub>)

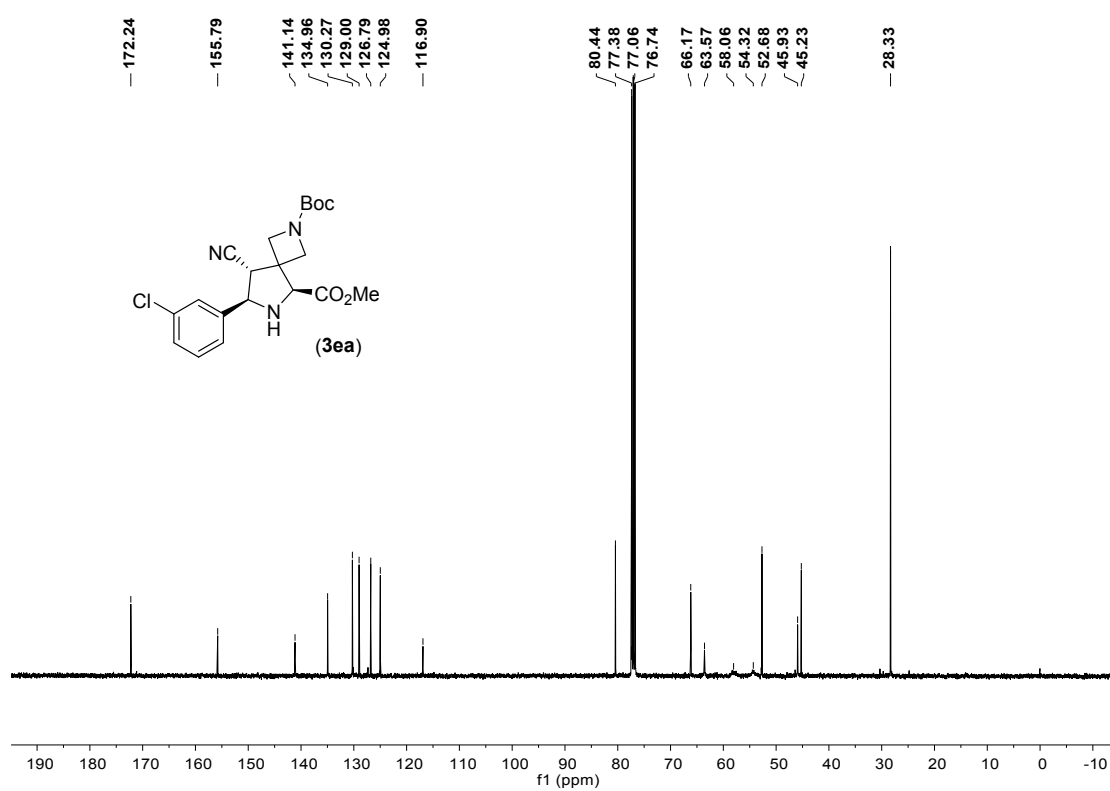

<sup>1</sup>H NMR spectrum of compound **3fa** (CDCl<sub>3</sub>)

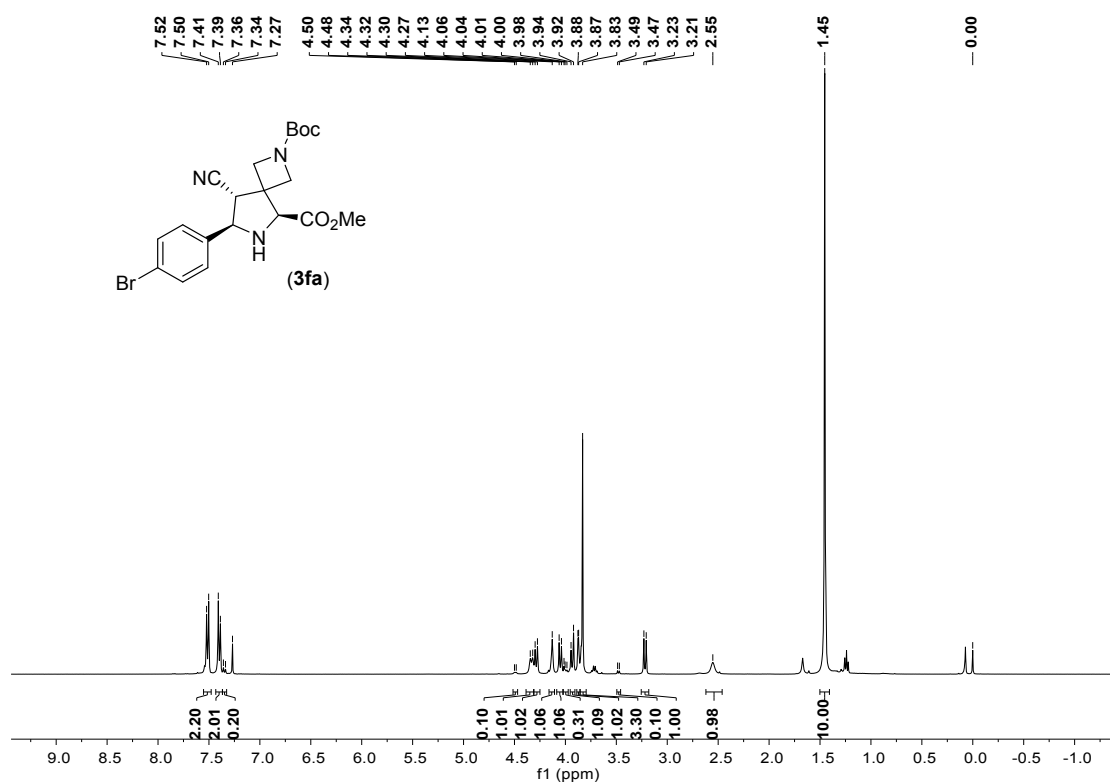

<sup>13</sup>C NMR spectrum of compound **3fa** (CDCl<sub>3</sub>)

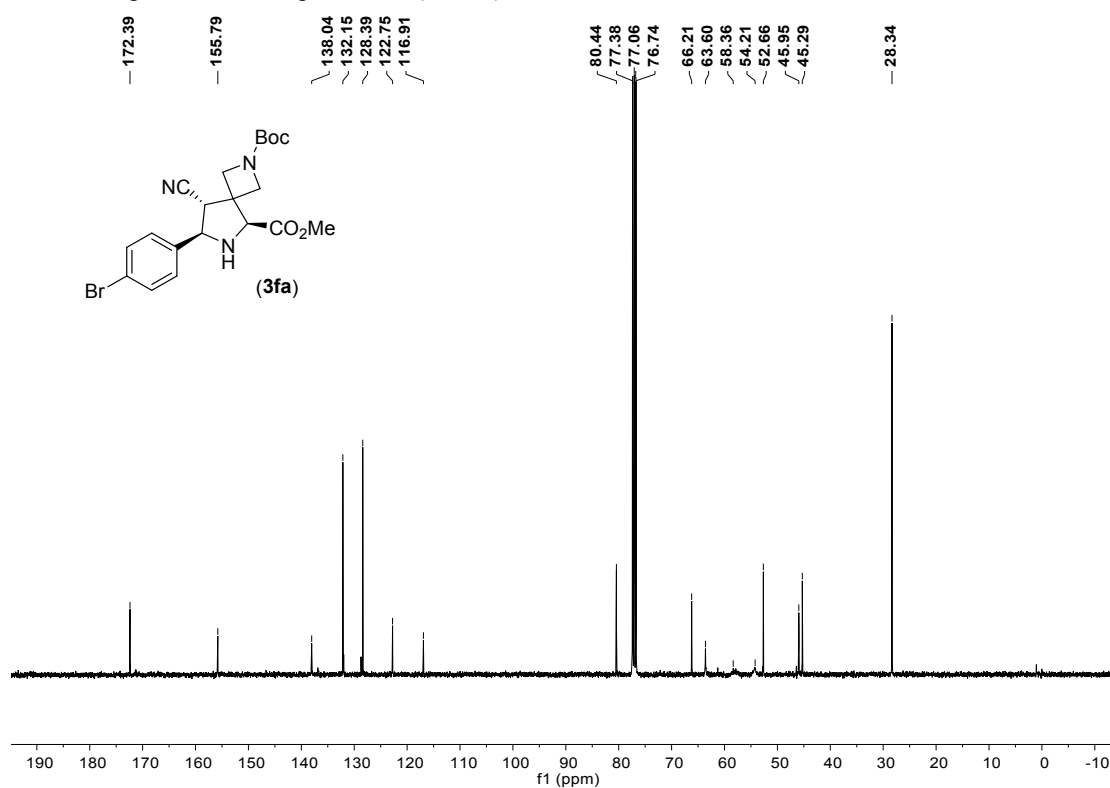

<sup>1</sup>H NMR spectrum of compound **3ga** (CDCl<sub>3</sub>)

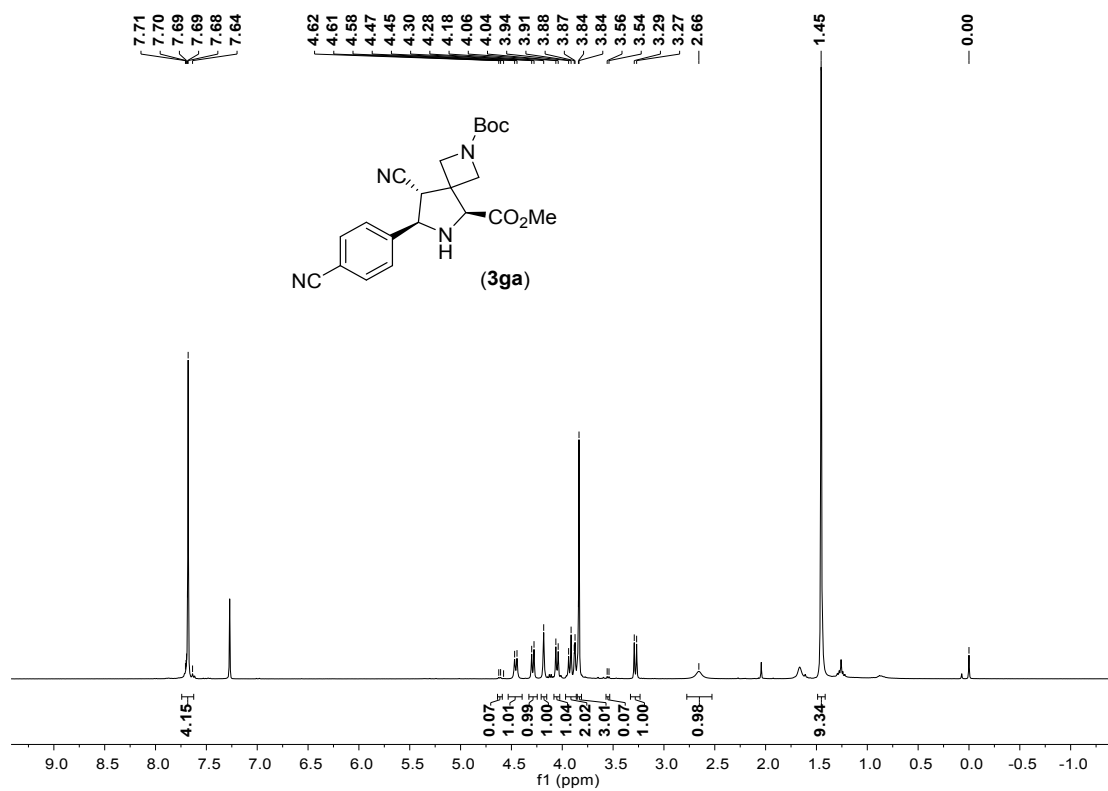

<sup>13</sup>C NMR spectrum of compound **3ga** (CDCl<sub>3</sub>)

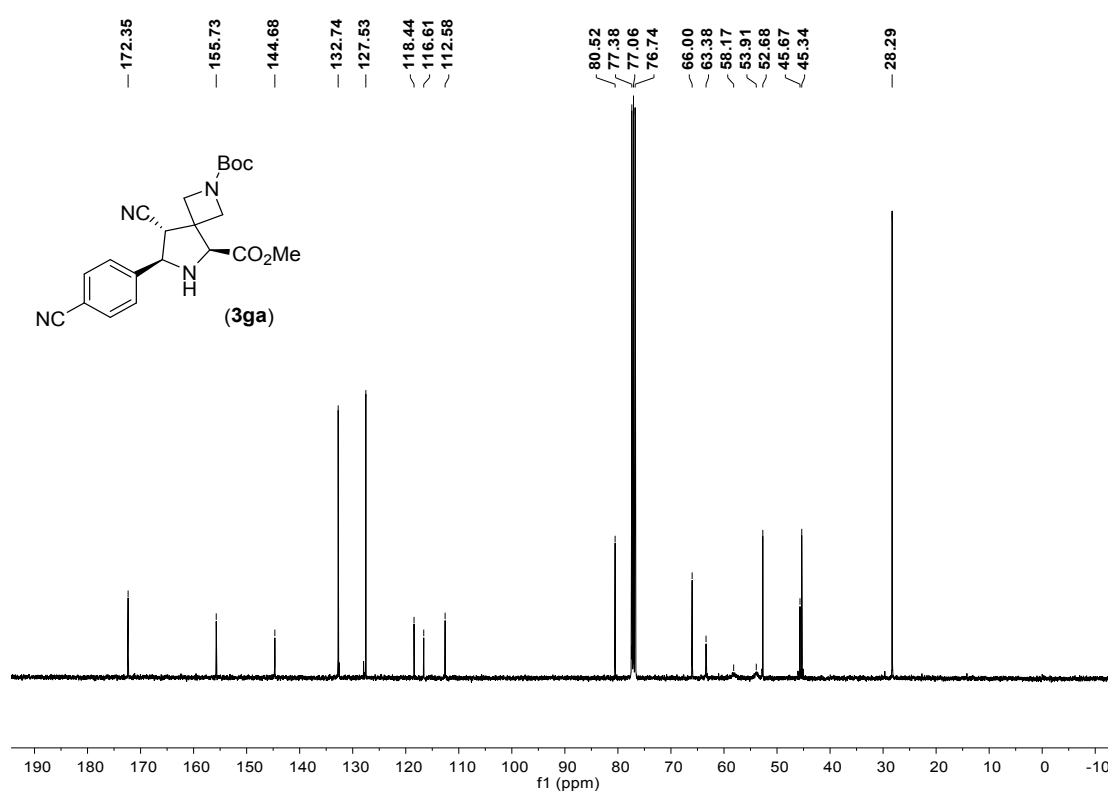

<sup>1</sup>H NMR spectrum of compound **3ha** (CDCl<sub>3</sub>)

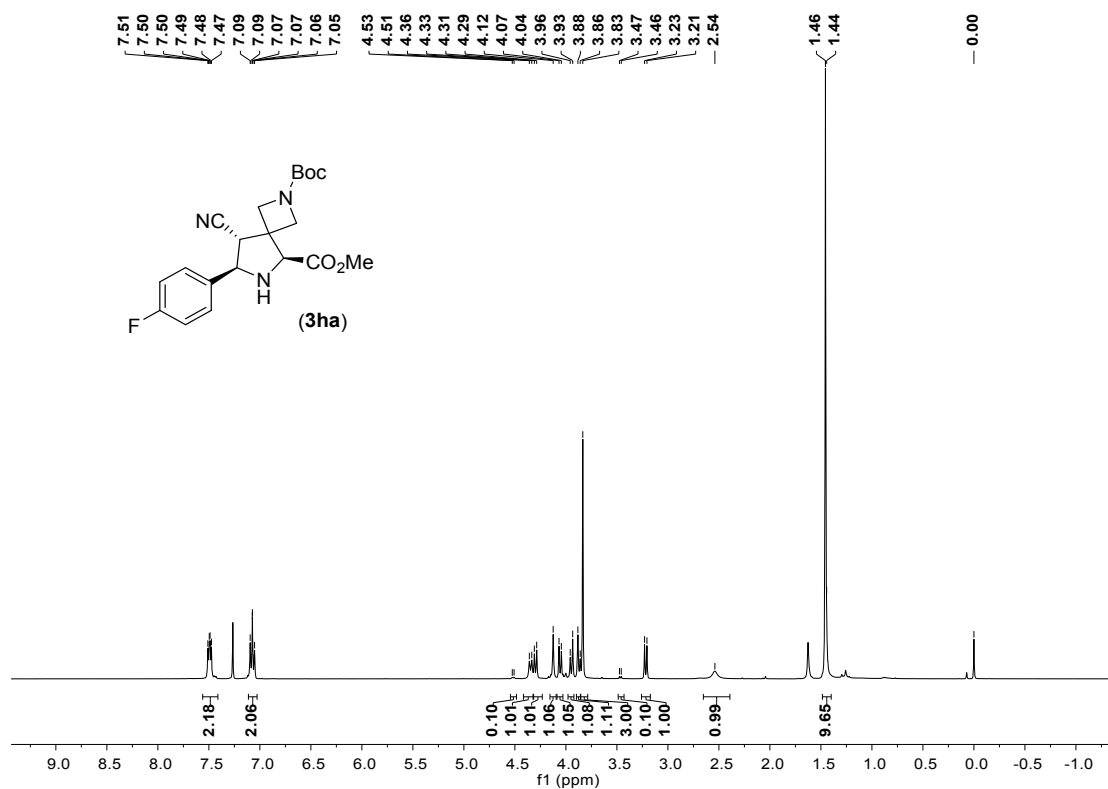

<sup>13</sup>C NMR spectrum of compound **3ha** (CDCl<sub>3</sub>)

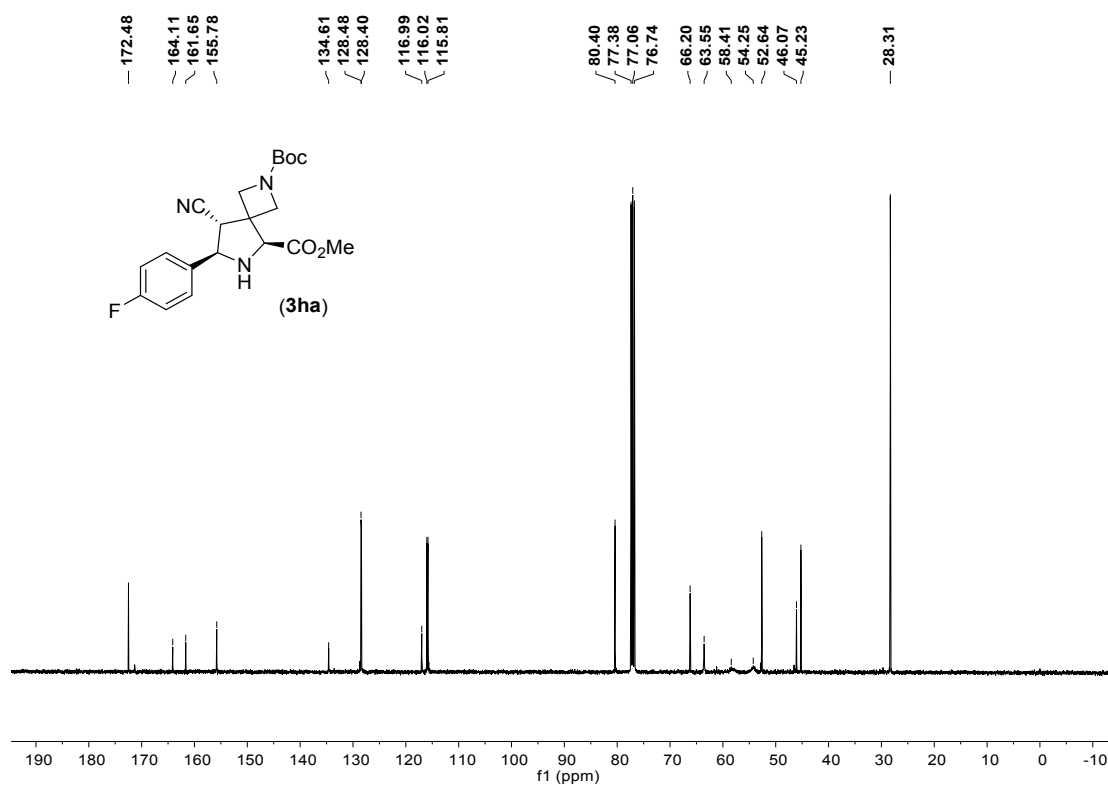



<sup>1</sup>H NMR spectrum of compound **3ia** (CDCl<sub>3</sub>)

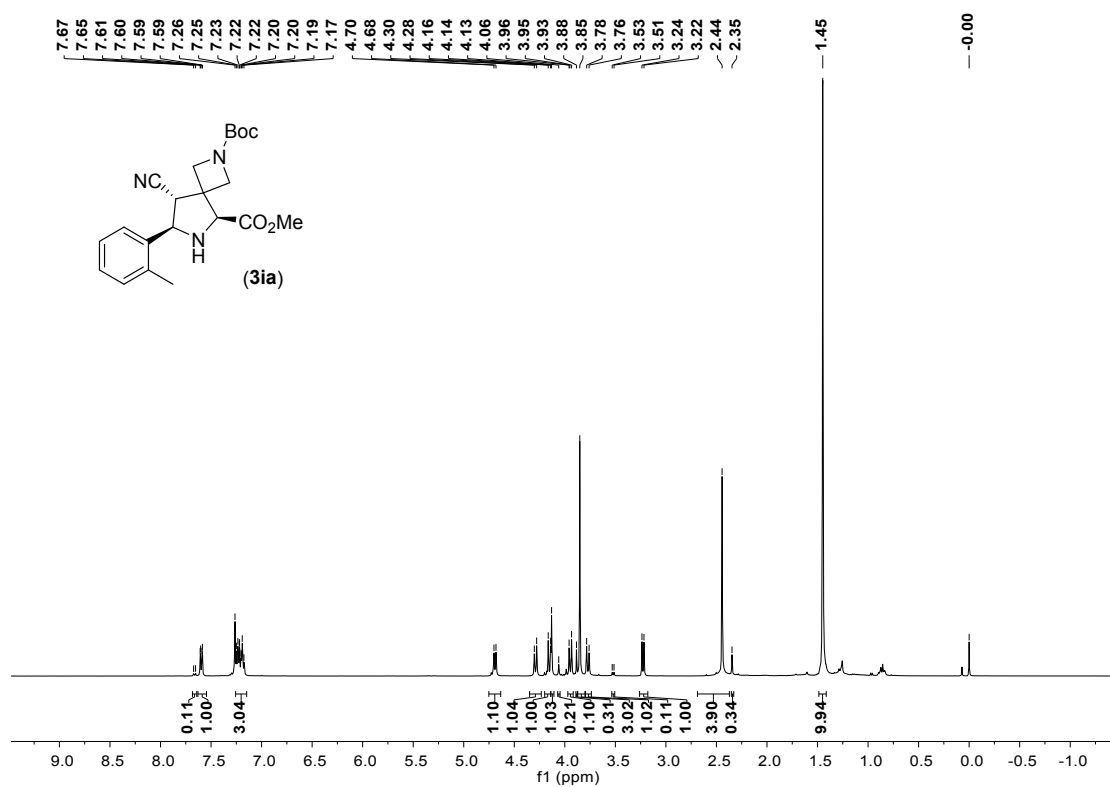

<sup>13</sup>C NMR spectrum of compound **3ia** (CDCl<sub>3</sub>)

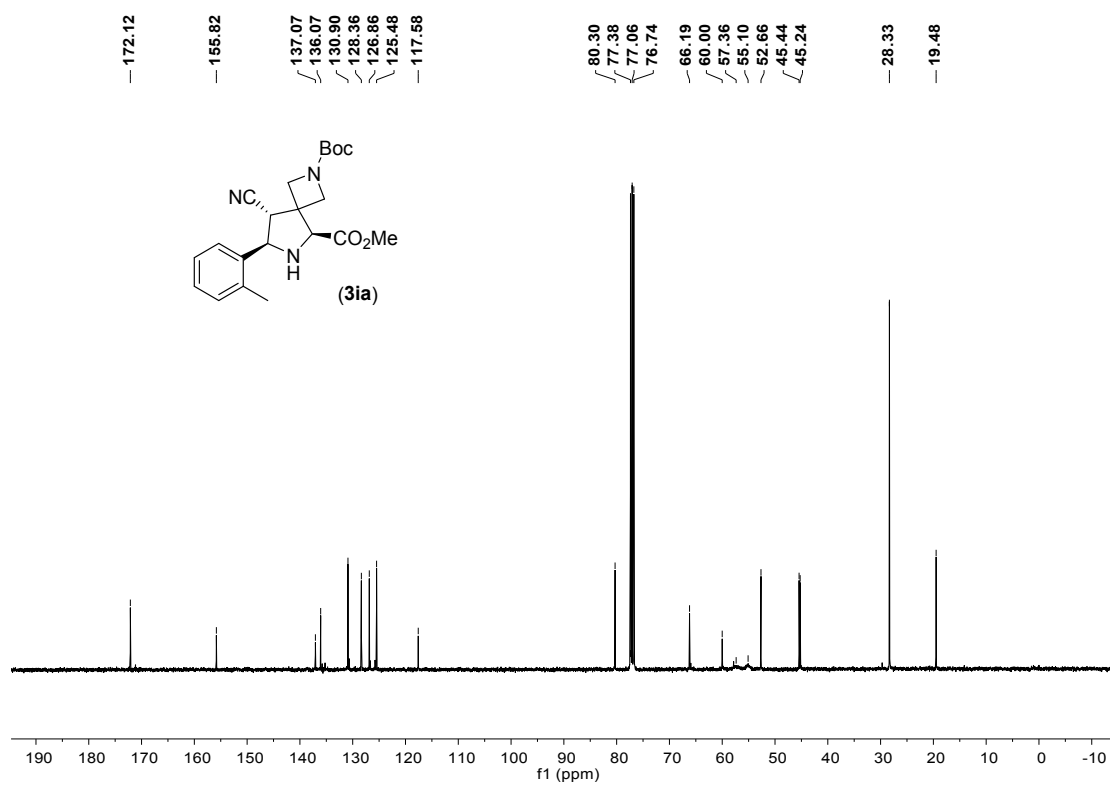

<sup>1</sup>H NMR spectrum of compound **3ja** (CDCl<sub>3</sub>)

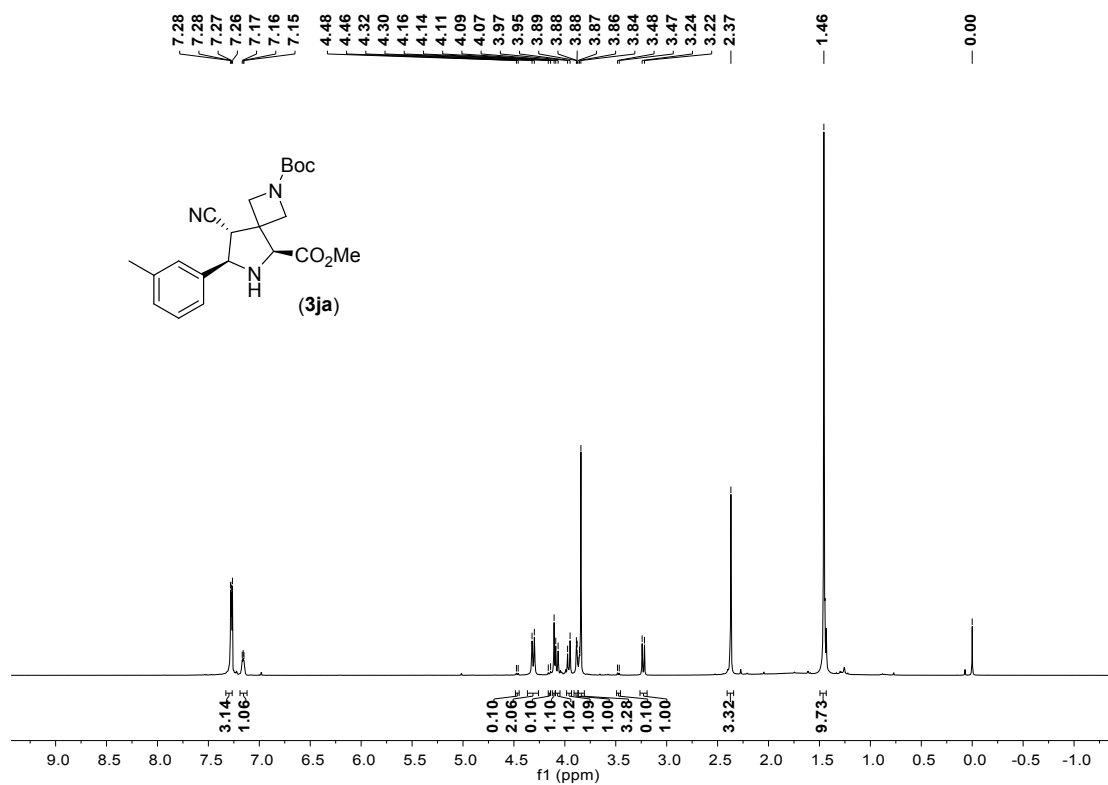

<sup>13</sup>C NMR spectrum of compound **3ja** (CDCl<sub>3</sub>)

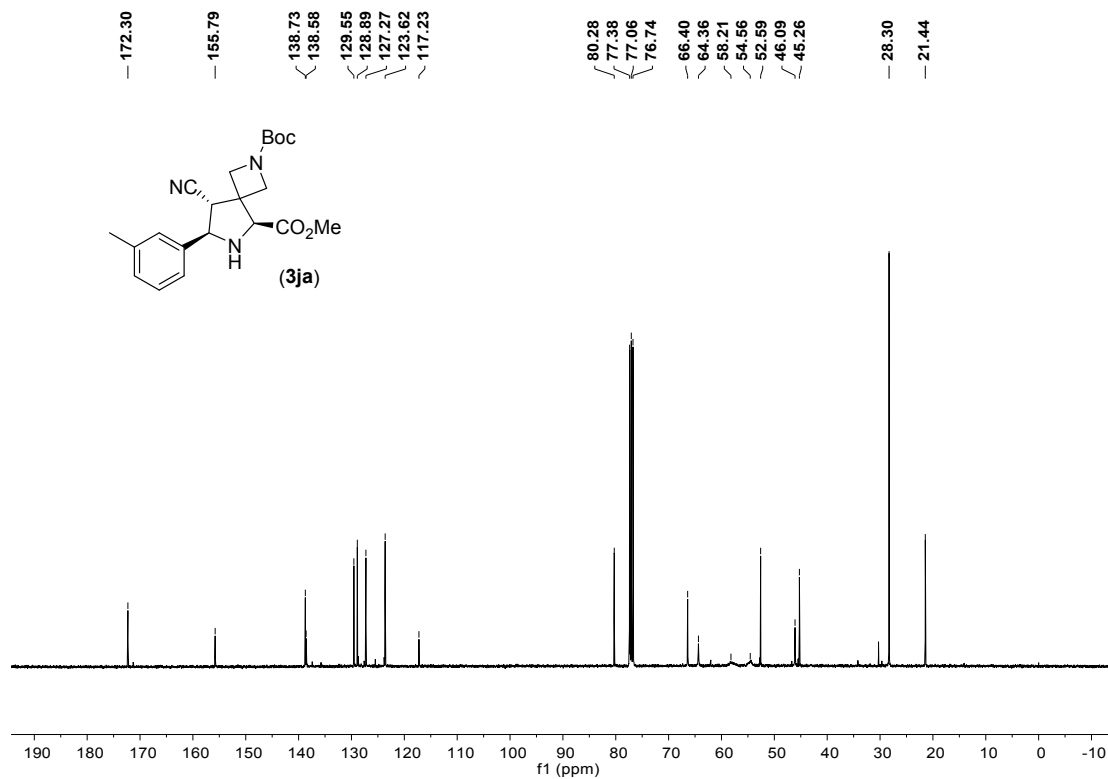

<sup>1</sup>H NMR spectrum of compound **3ka** (CDCl<sub>3</sub>)

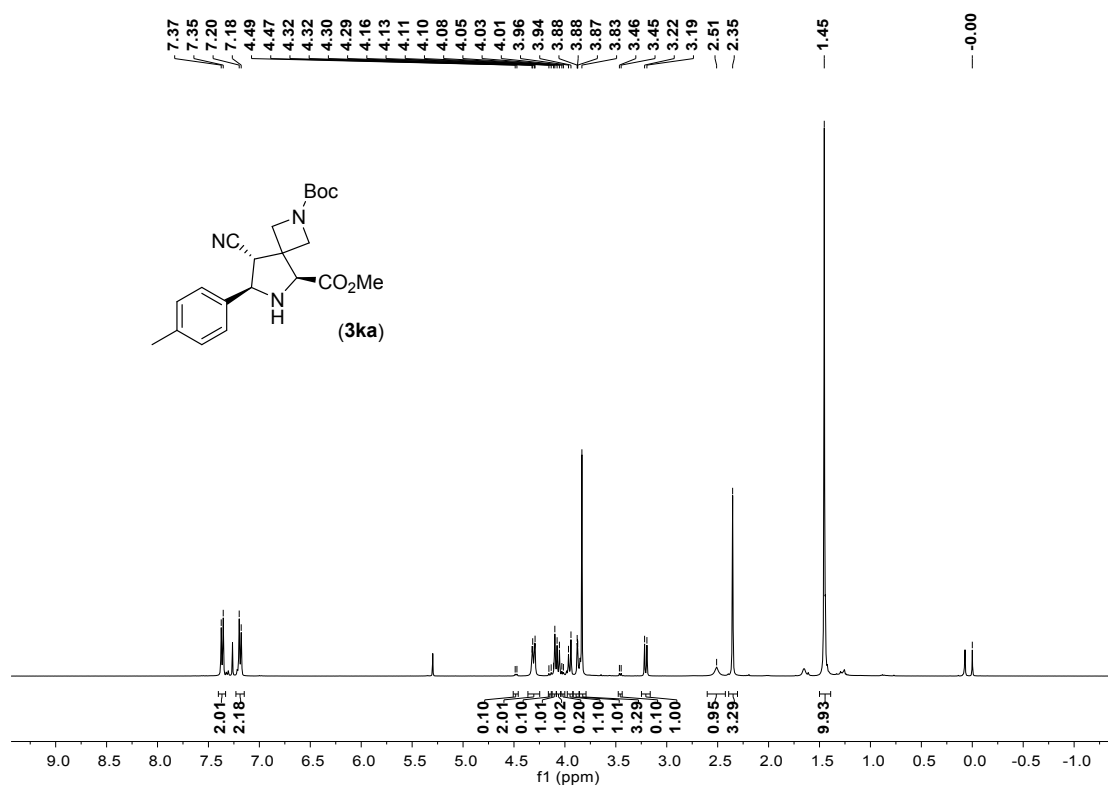

<sup>13</sup>C NMR spectrum of compound **3ka** (CDCl<sub>3</sub>)

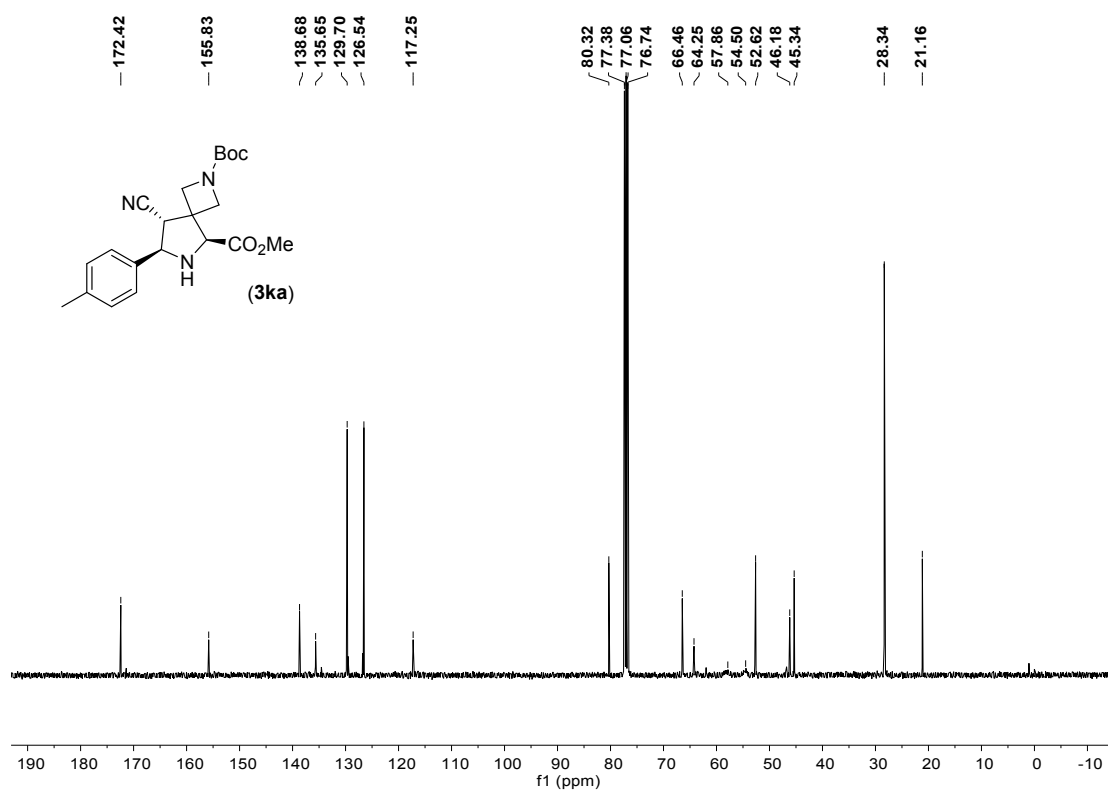

<sup>1</sup>H NMR spectrum of compound **3la** (CDCl<sub>3</sub>)

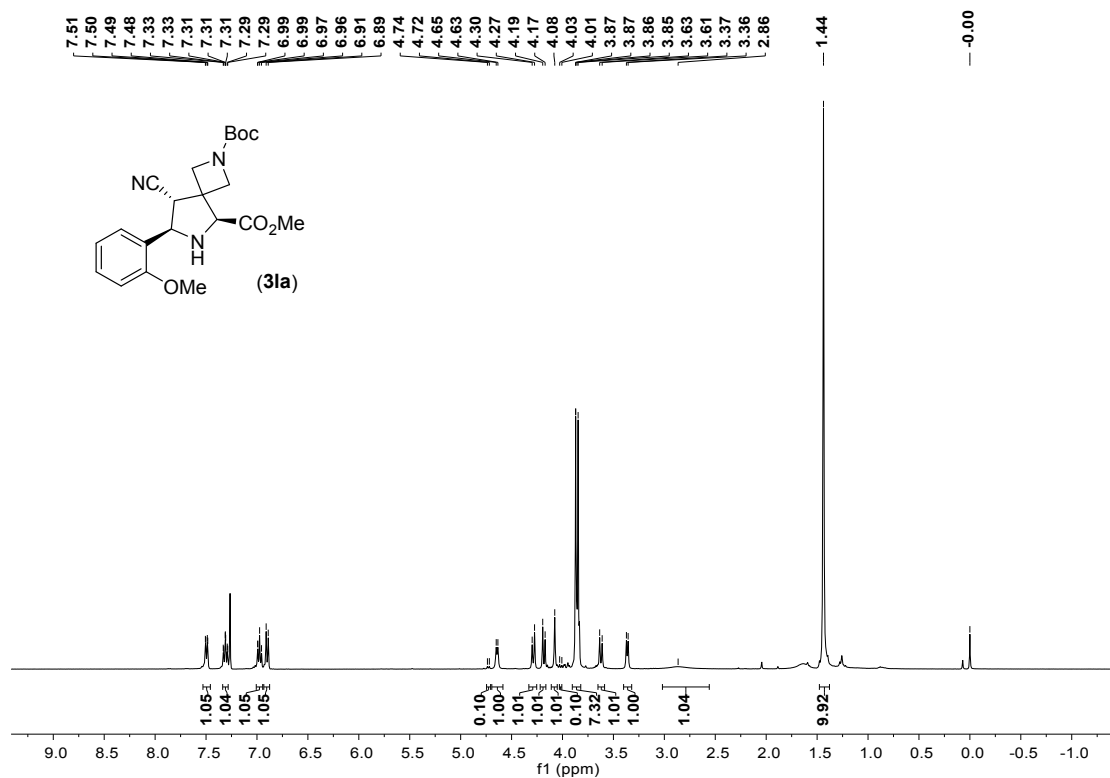

<sup>13</sup>C NMR spectrum of compound **3la** (CDCl<sub>3</sub>)

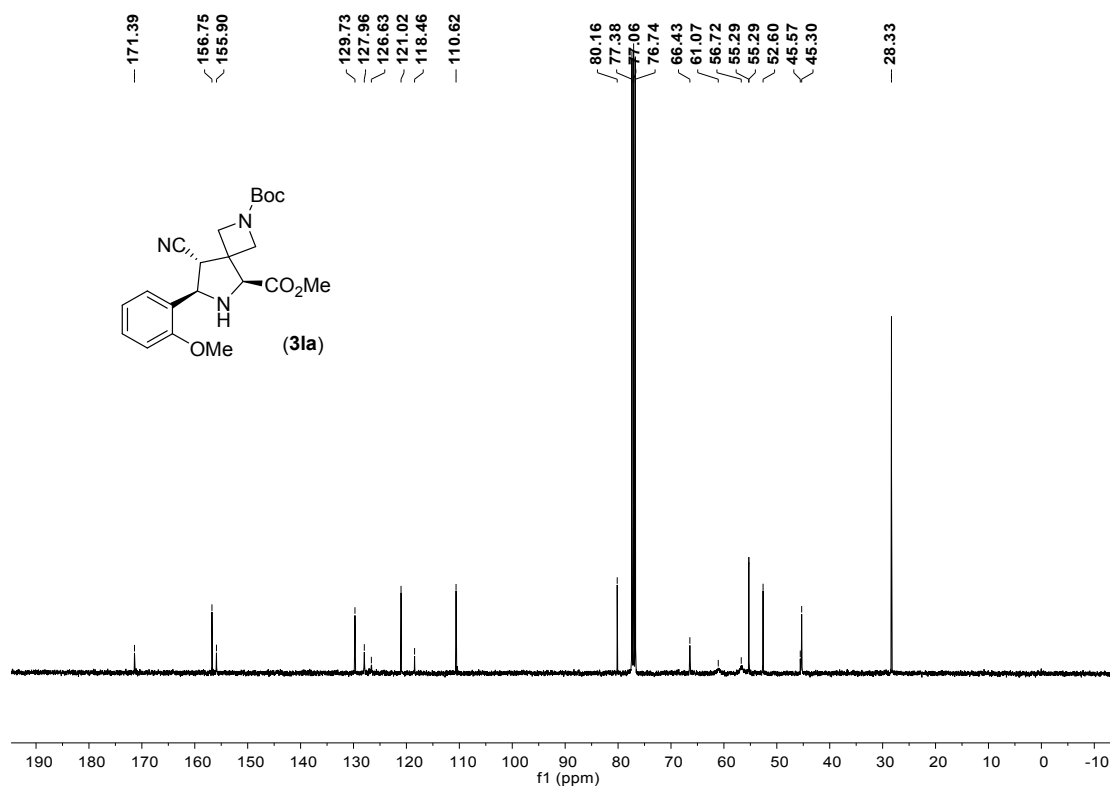

<sup>1</sup>H NMR spectrum of compound **3ma** (CDCl<sub>3</sub>)

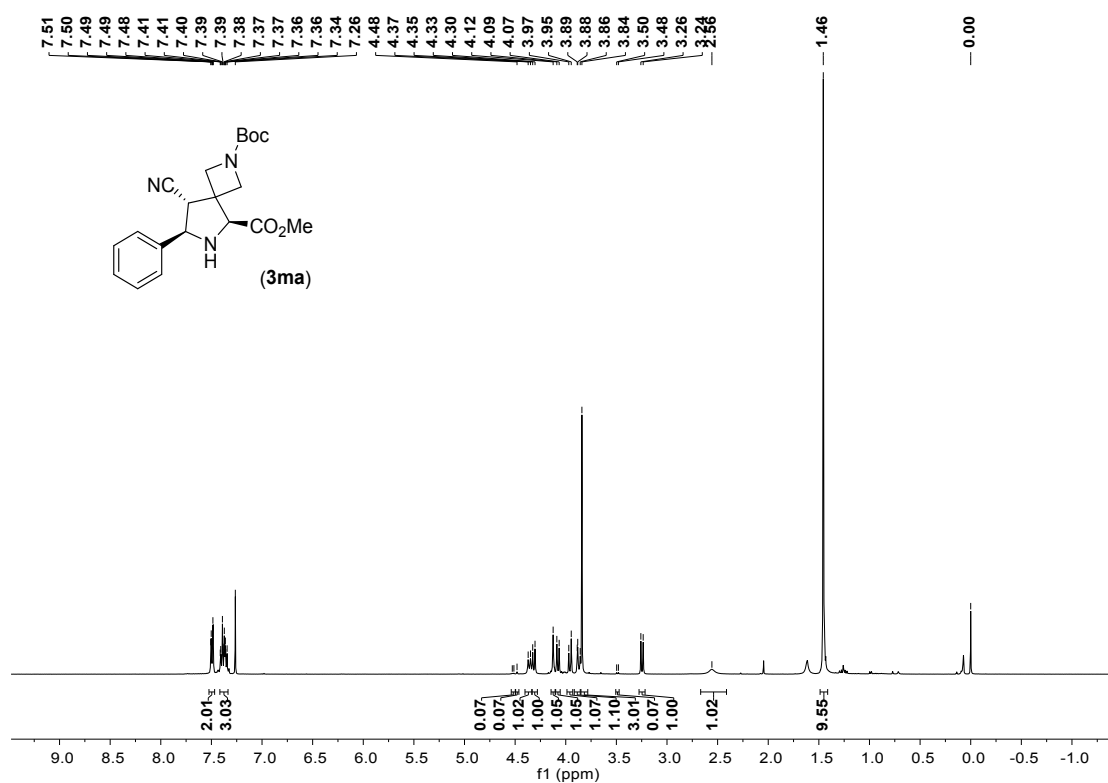

<sup>13</sup>C NMR spectrum of compound **3ma** (CDCl<sub>3</sub>)

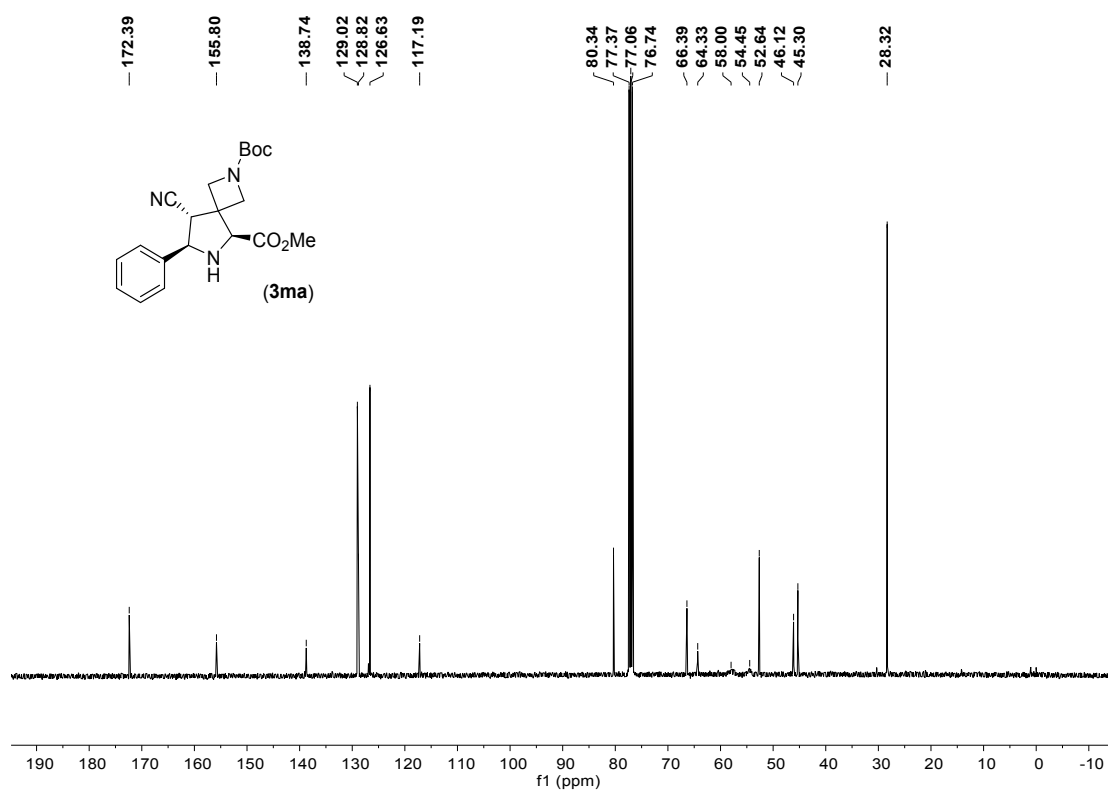

<sup>1</sup>H NMR spectrum of compound **3na** (CDCl<sub>3</sub>)

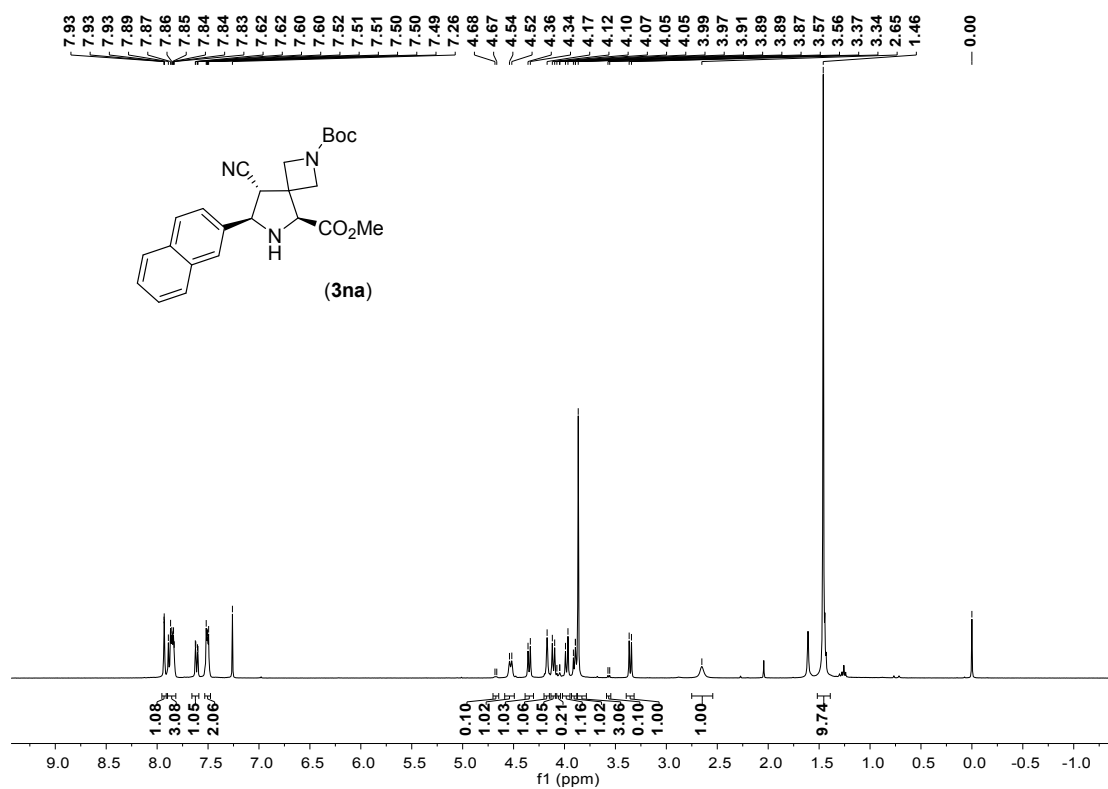

<sup>13</sup>C NMR spectrum of compound **3na** (CDCl<sub>3</sub>)

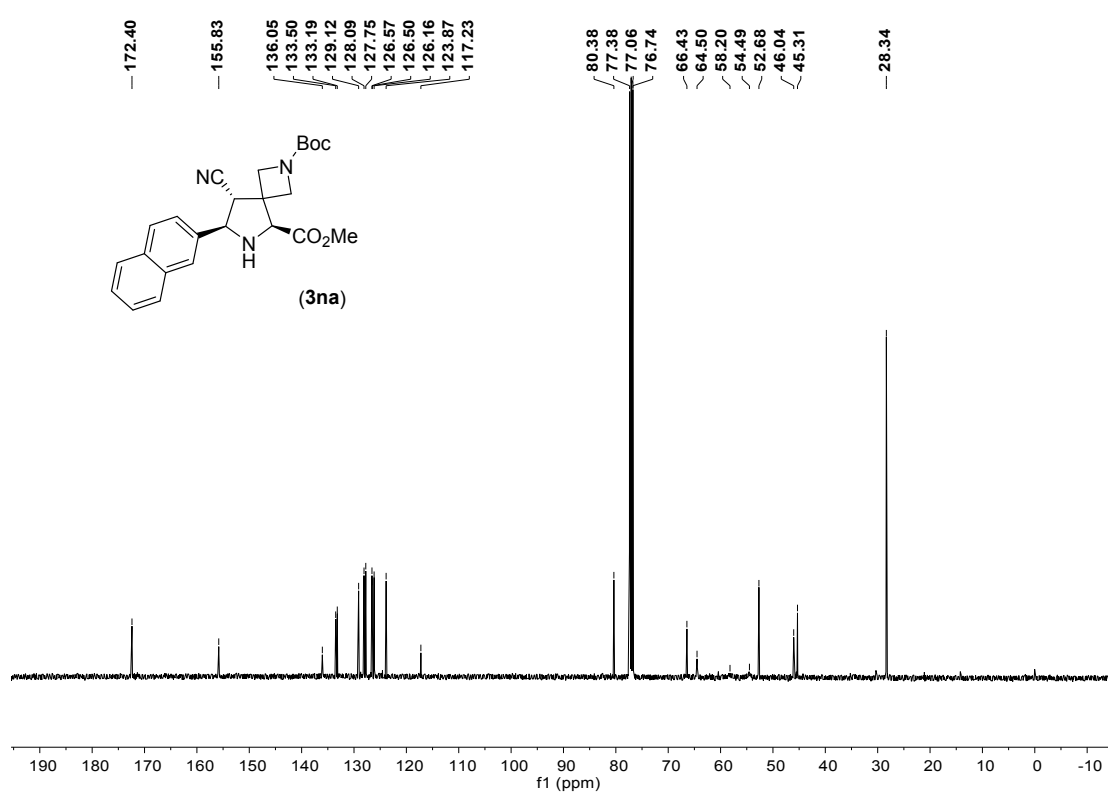

<sup>1</sup>H NMR spectrum of compound **30a** (CDCl<sub>3</sub>)

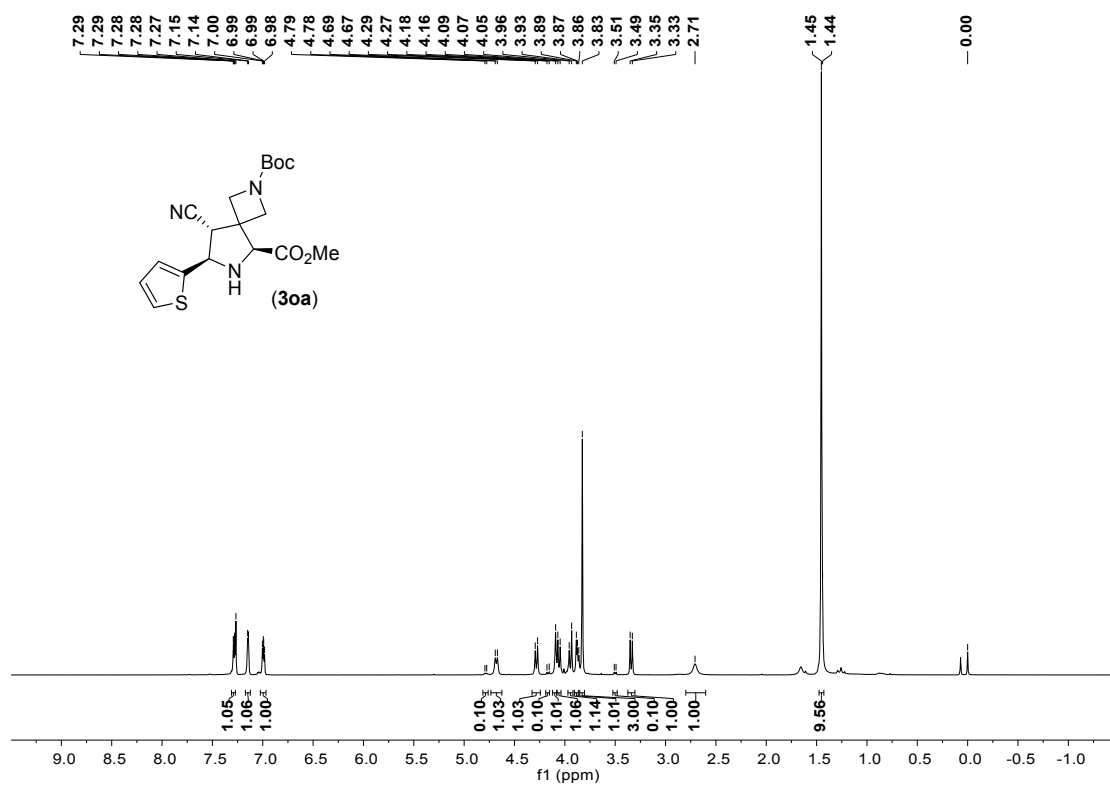

<sup>13</sup>C NMR spectrum of compound **30a** (CDCl<sub>3</sub>)

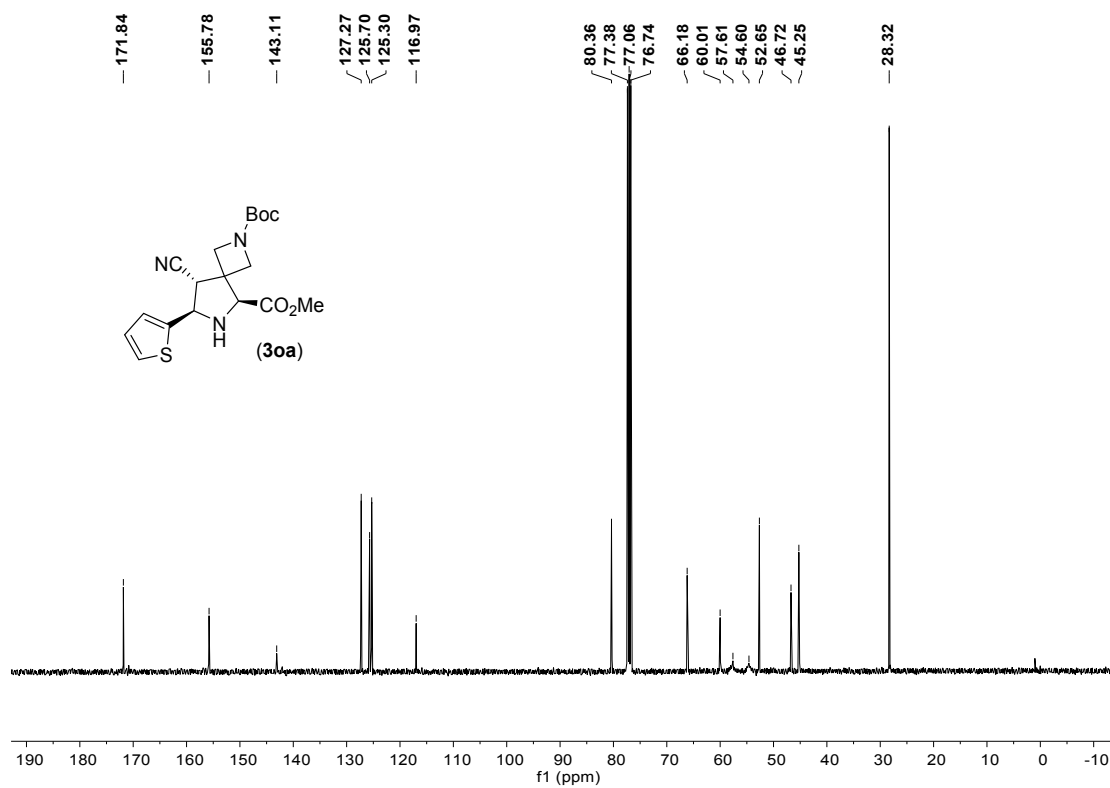

<sup>1</sup>H NMR spectrum of compound **3pa** (CDCl<sub>3</sub>)

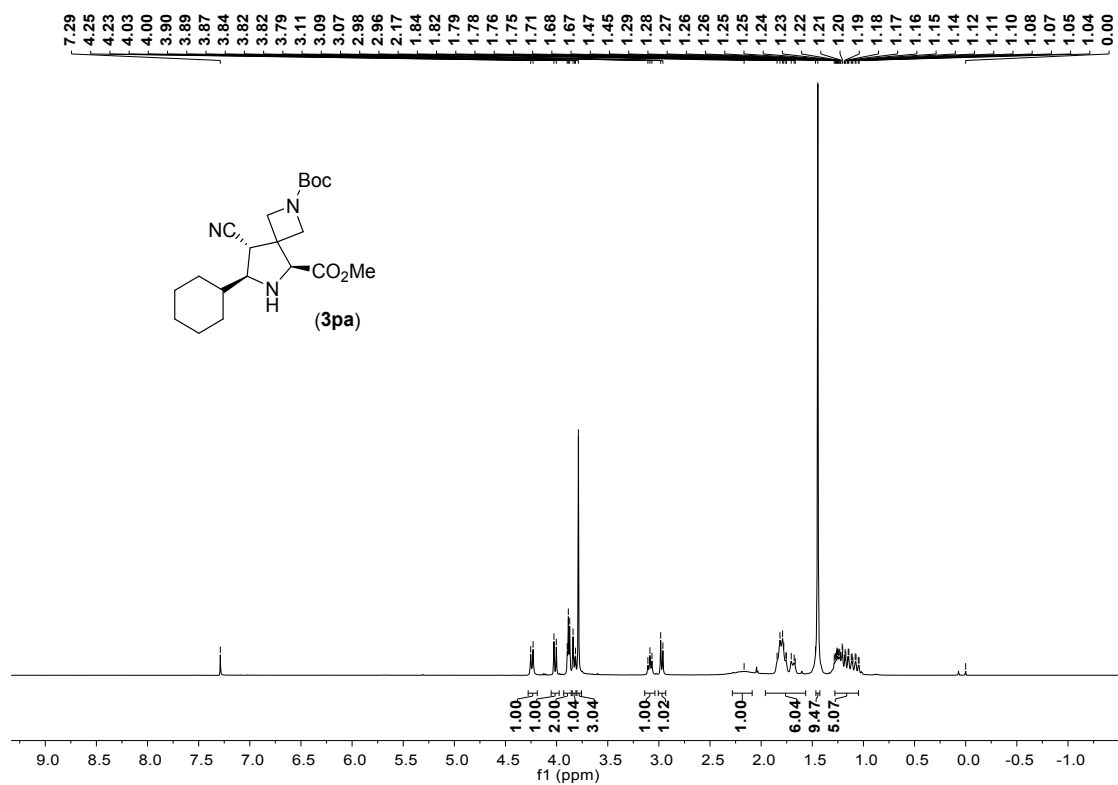

<sup>13</sup>C NMR spectrum of compound **3pa** (CDCl<sub>3</sub>)

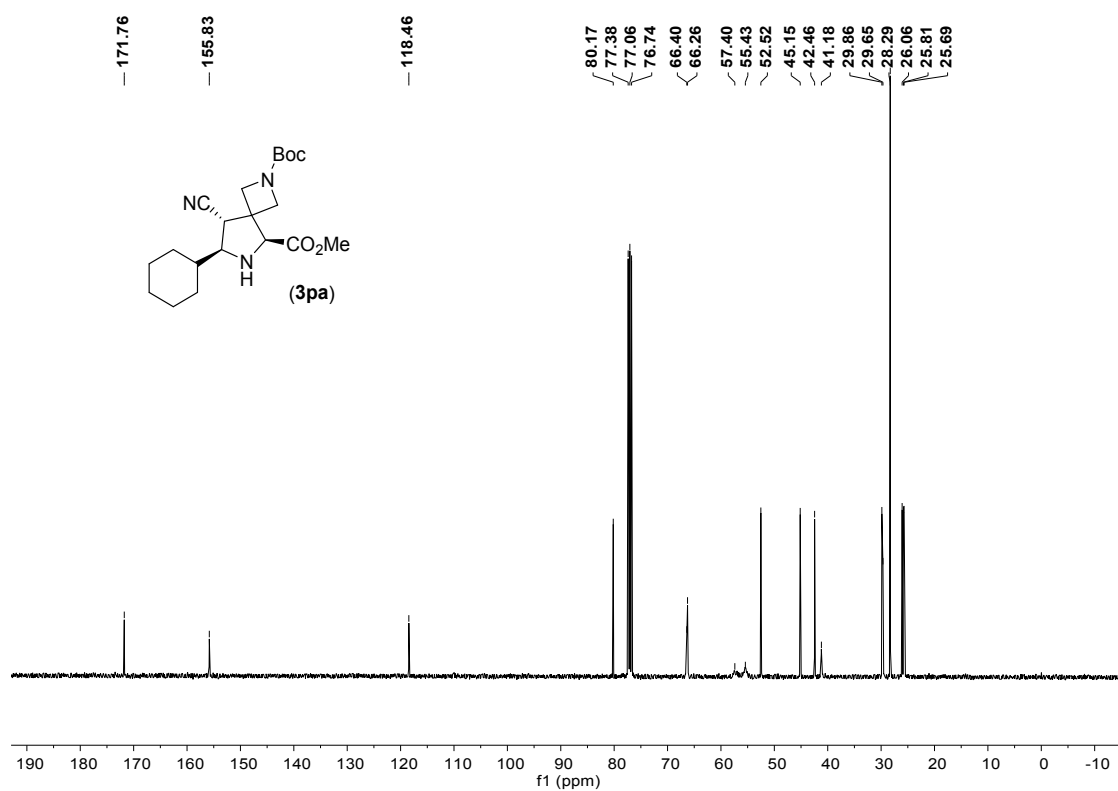



<sup>1</sup>H NMR spectrum of compound **3qa** (CDCl<sub>3</sub>)

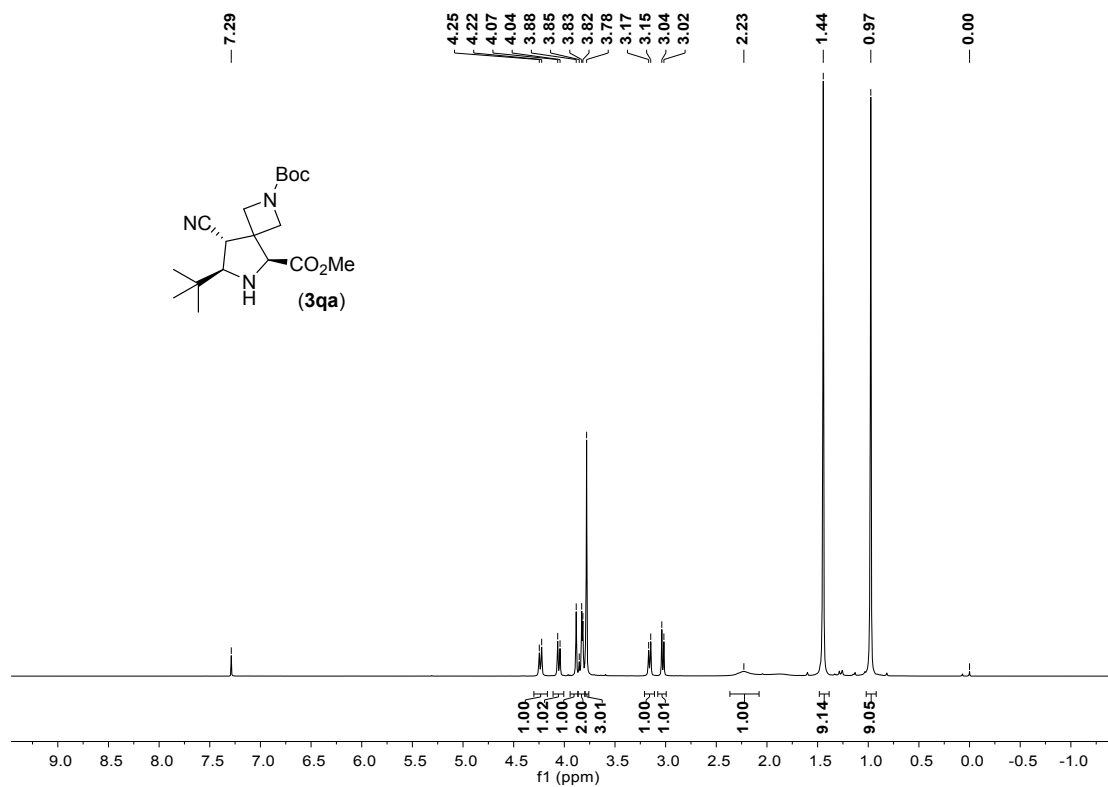

<sup>13</sup>C NMR spectrum of compound **3qa** (CDCl<sub>3</sub>)

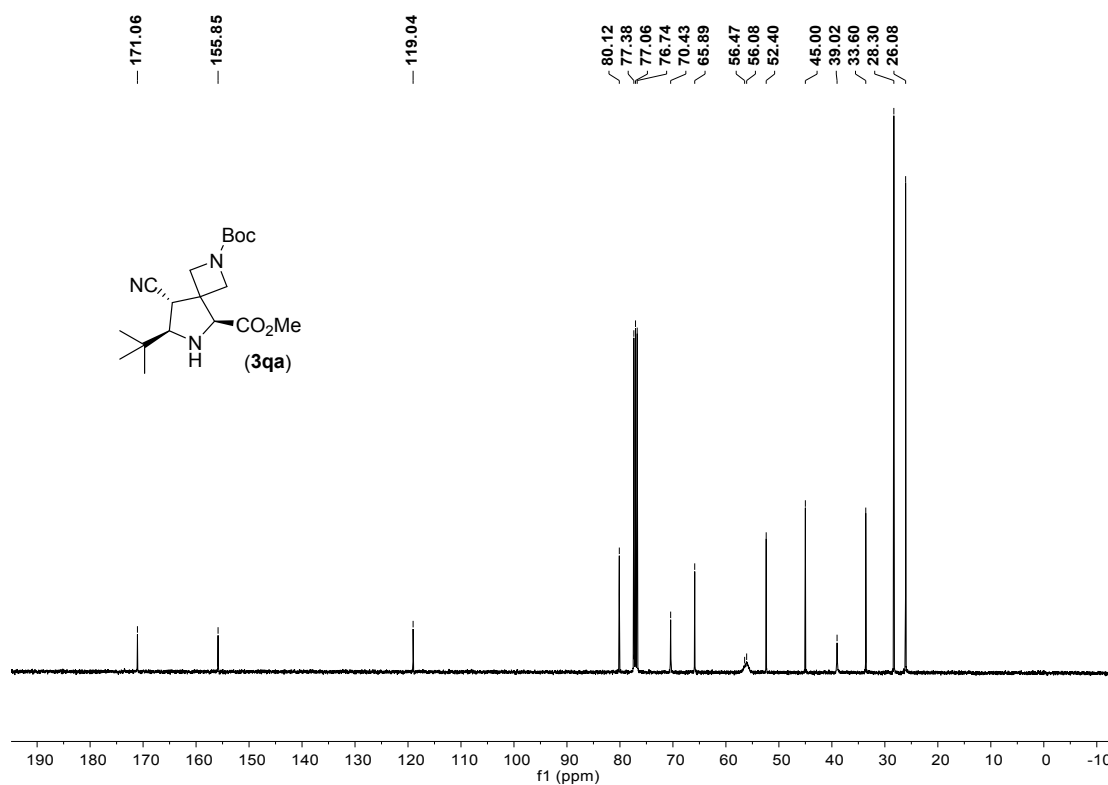

<sup>1</sup>H NMR spectrum of compound **3ab** (CDCl<sub>3</sub>)

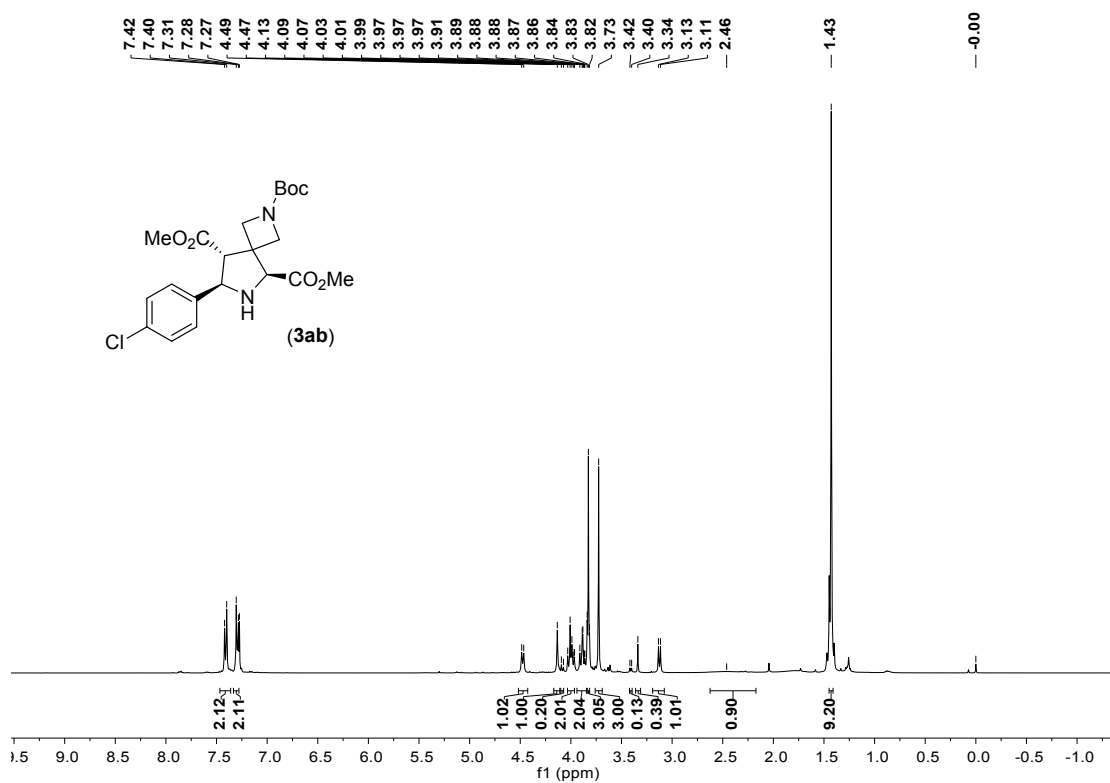

<sup>13</sup>C NMR spectrum of compound **3ab** (CDCl<sub>3</sub>)

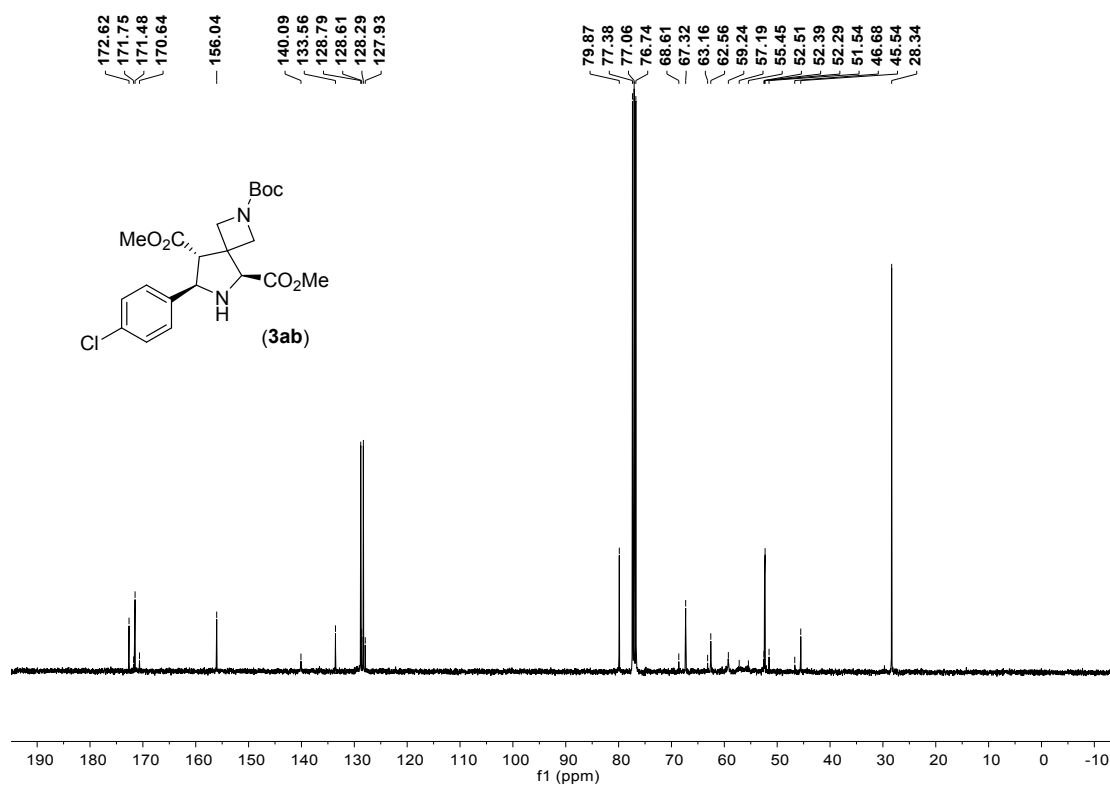

<sup>1</sup>H NMR spectrum of compound **3ac** (CDCl<sub>3</sub>)

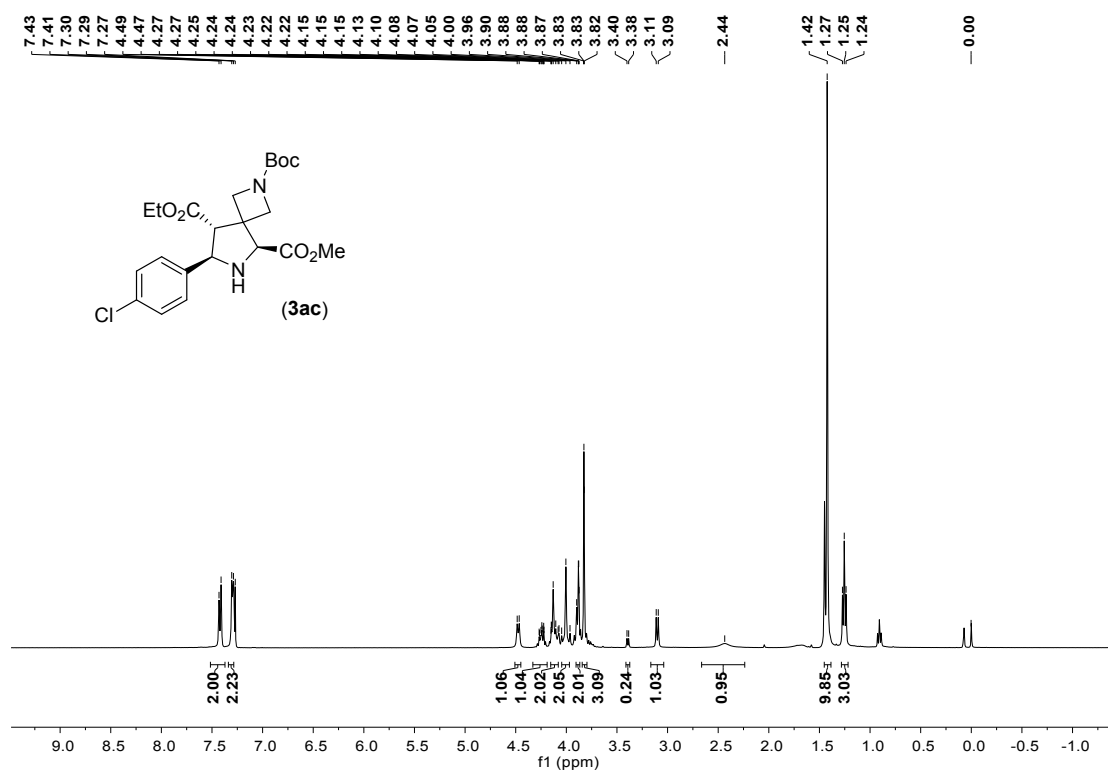

<sup>13</sup>C NMR spectrum of compound **3ac** (CDCl<sub>3</sub>)

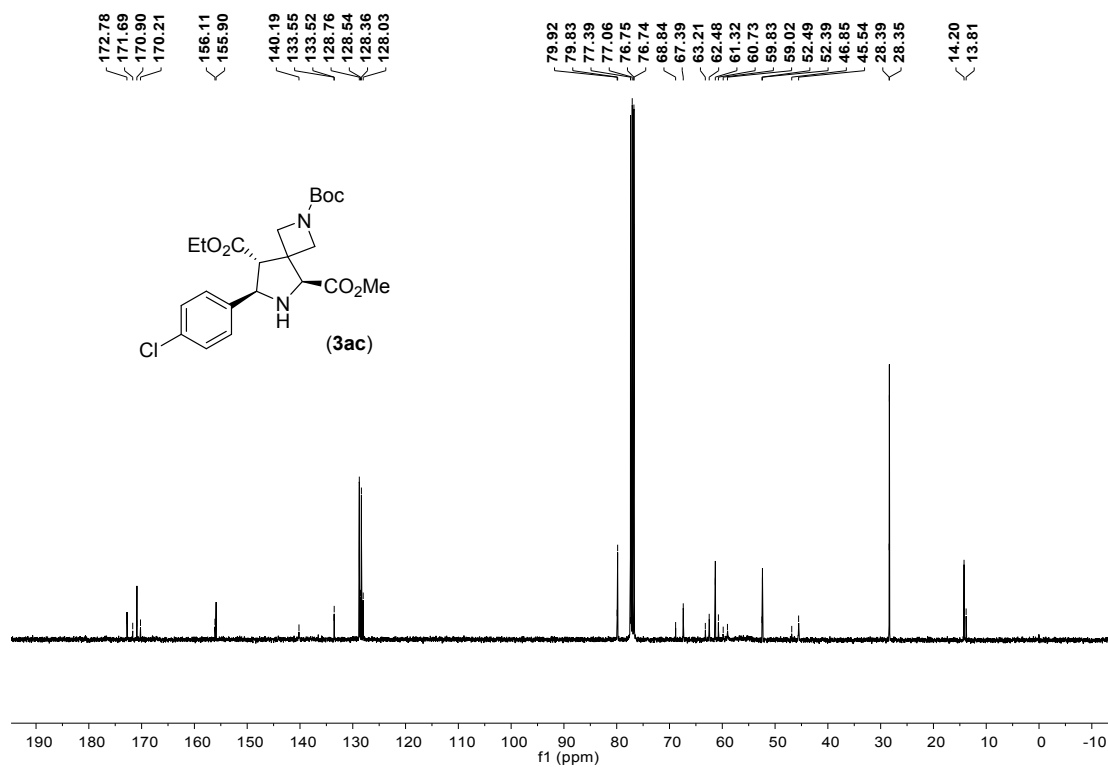

<sup>1</sup>H NMR spectrum of compound **3ad** (CDCl<sub>3</sub>)

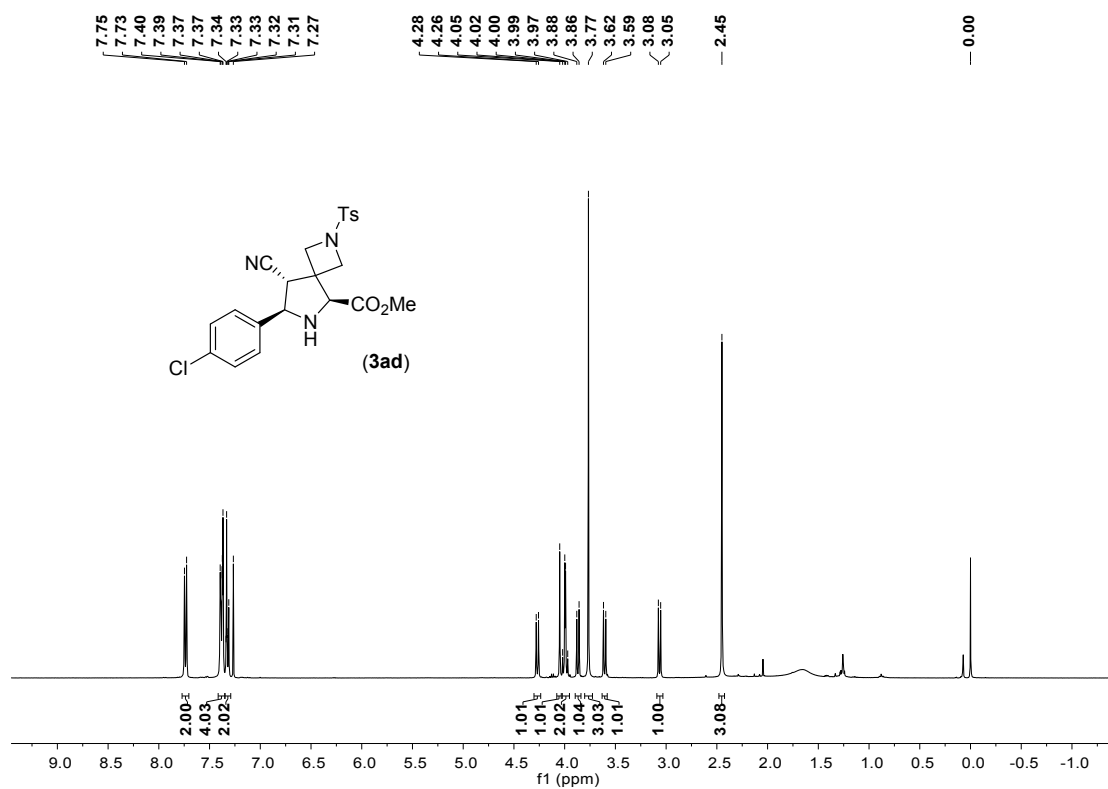

<sup>13</sup>C NMR spectrum of compound **3ad** (CDCl<sub>3</sub>)

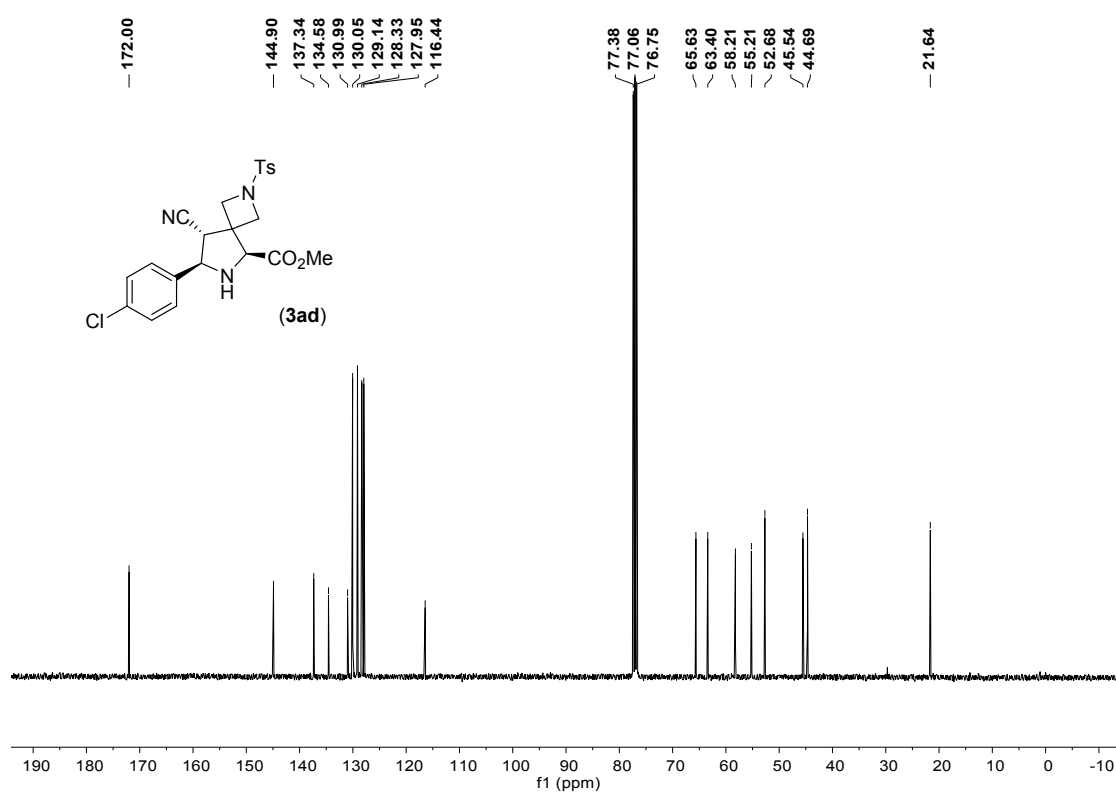

<sup>1</sup>H NMR spectrum of compound **3ae** (CDCl<sub>3</sub>)

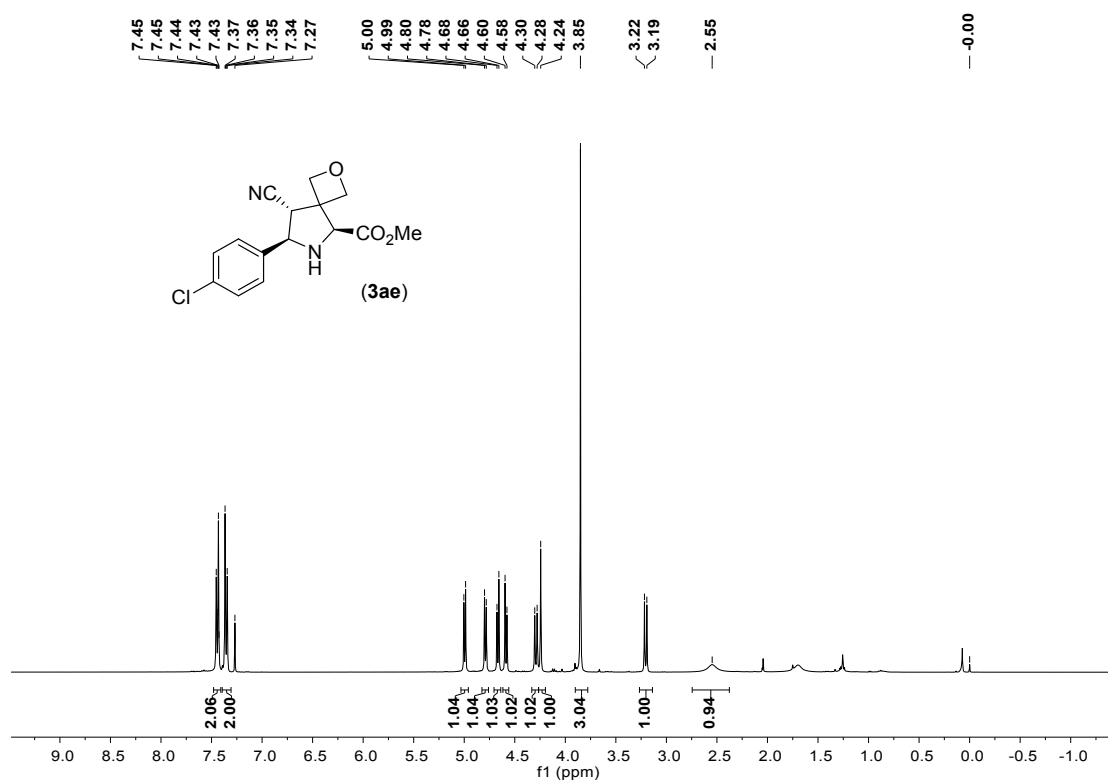

<sup>13</sup>C NMR spectrum of compound **3ae** (CDCl<sub>3</sub>)

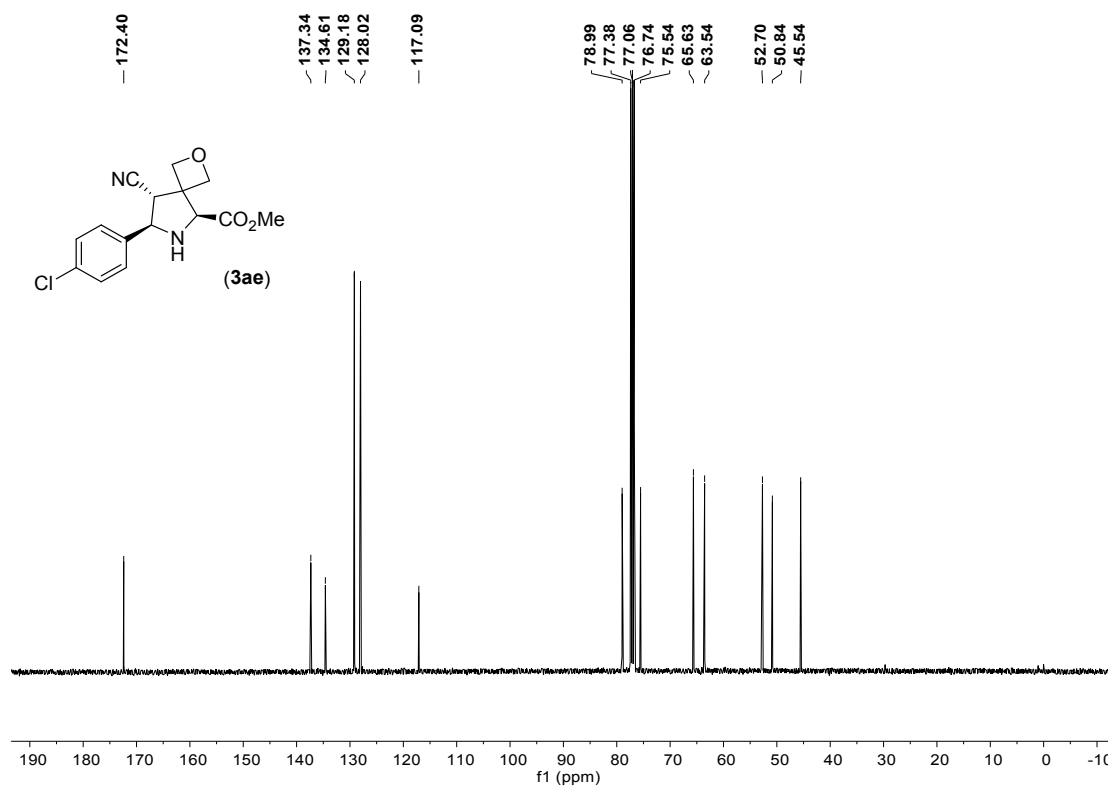

<sup>1</sup>H NMR spectrum of compound **3af** (CDCl<sub>3</sub>)

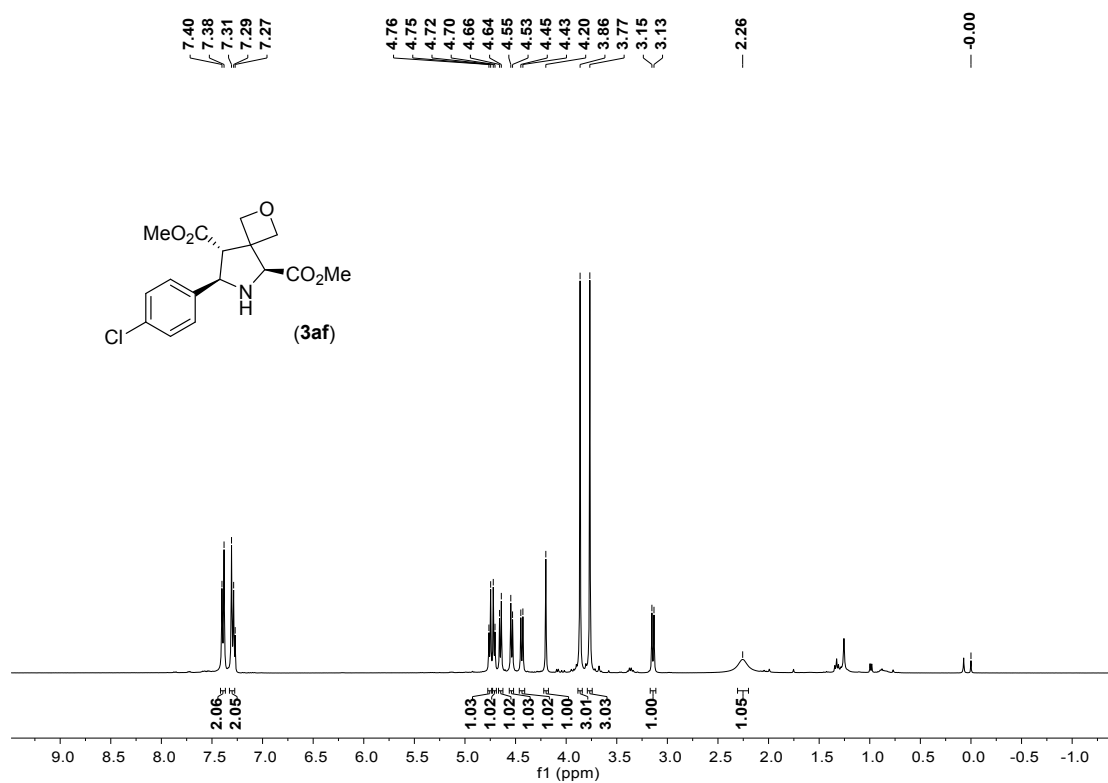

<sup>13</sup>C NMR spectrum of compound **3af** (CDCl<sub>3</sub>)

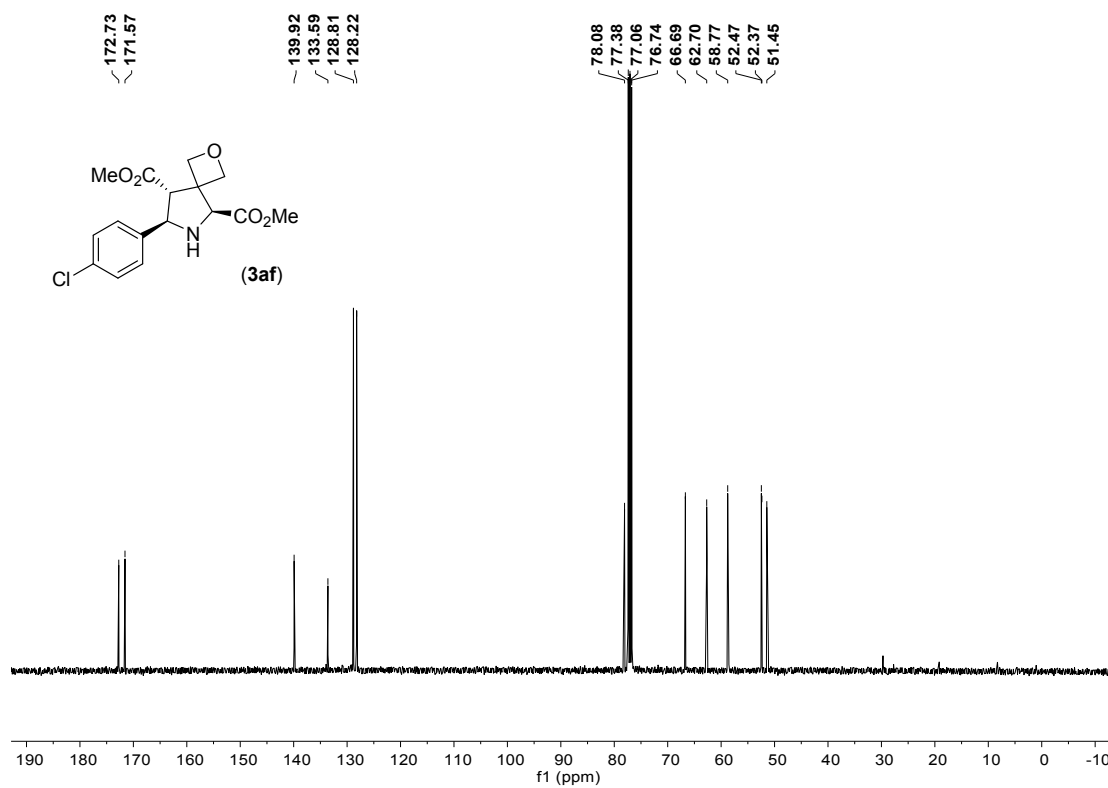

<sup>1</sup>H NMR spectrum of compound **3ag** (CDCl<sub>3</sub>)

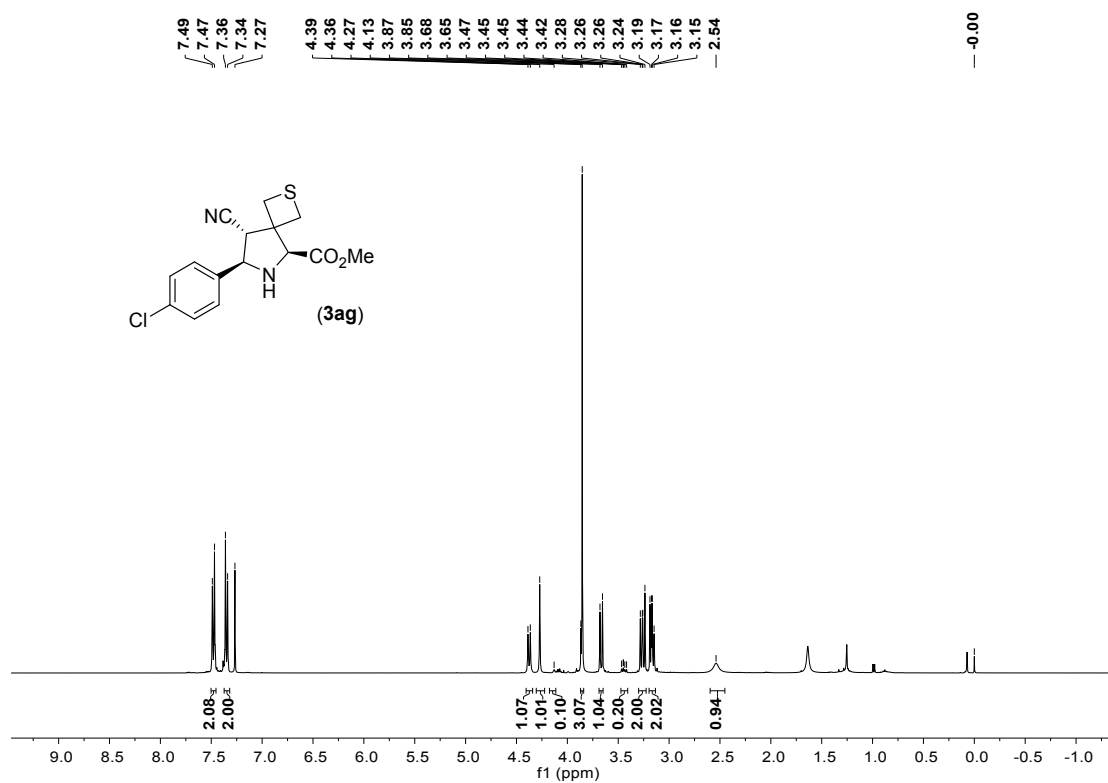

<sup>13</sup>C NMR spectrum of compound **3ag** (CDCl<sub>3</sub>)

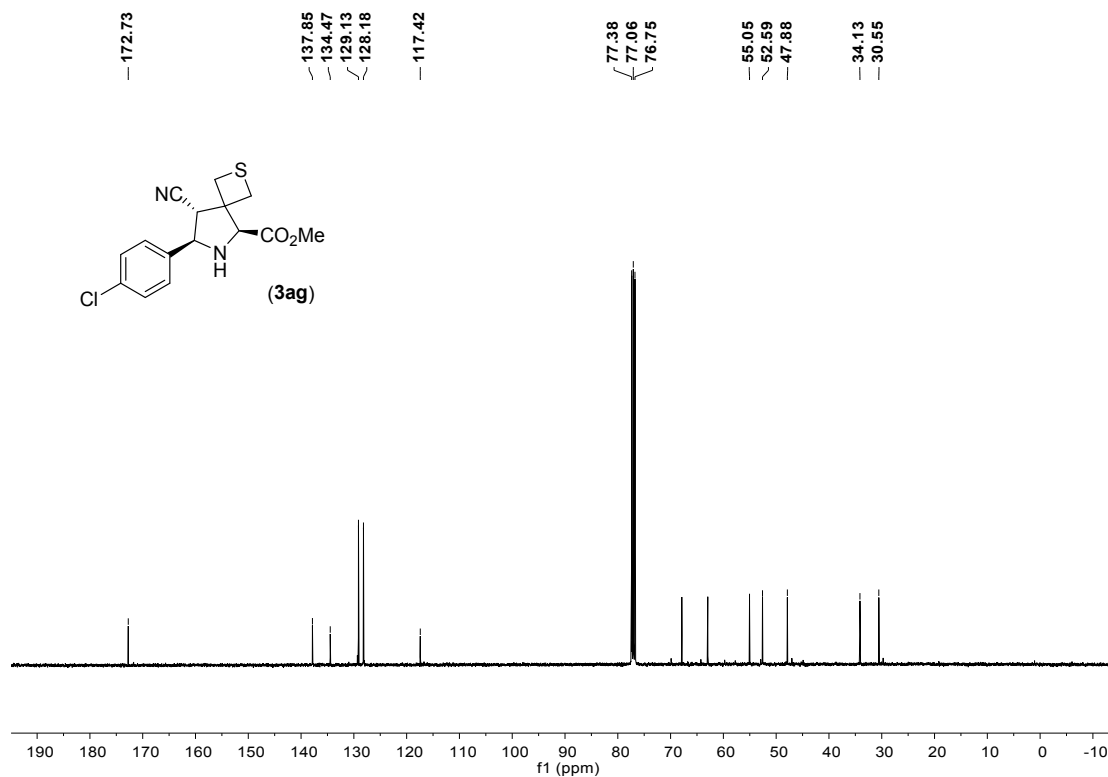

<sup>1</sup>H NMR spectrum of compound **3ah** (CDCl<sub>3</sub>)

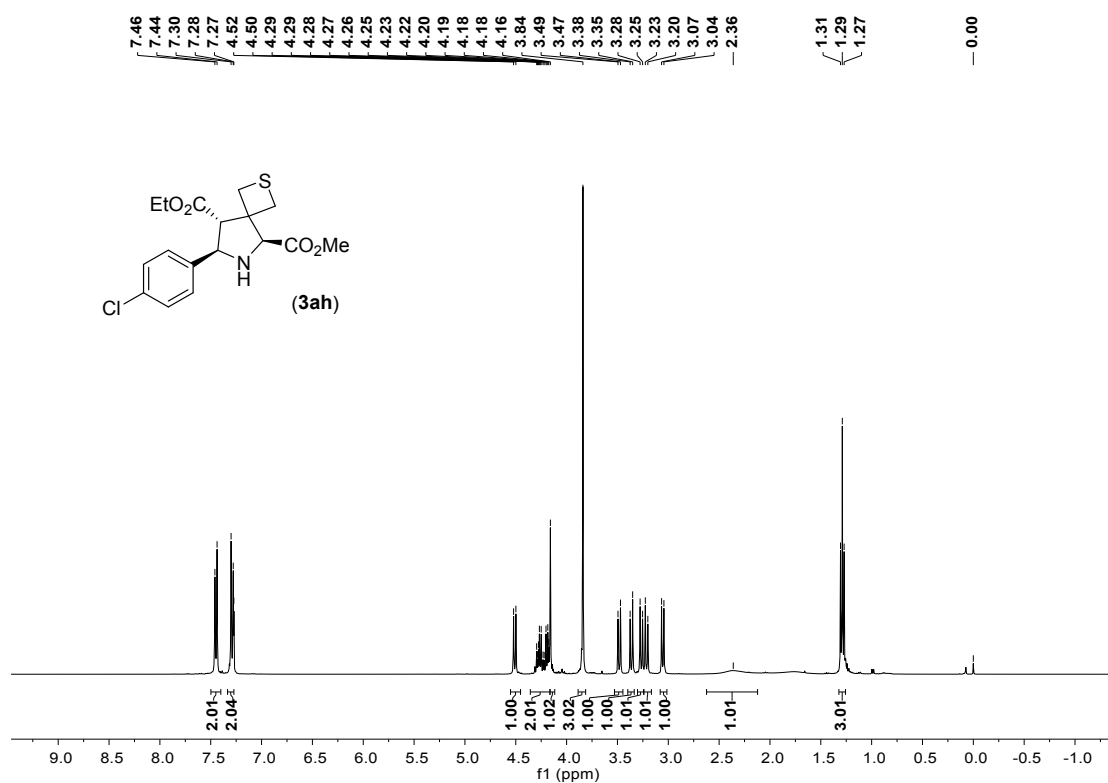

<sup>13</sup>C NMR spectrum of compound **3ah** (CDCl<sub>3</sub>)

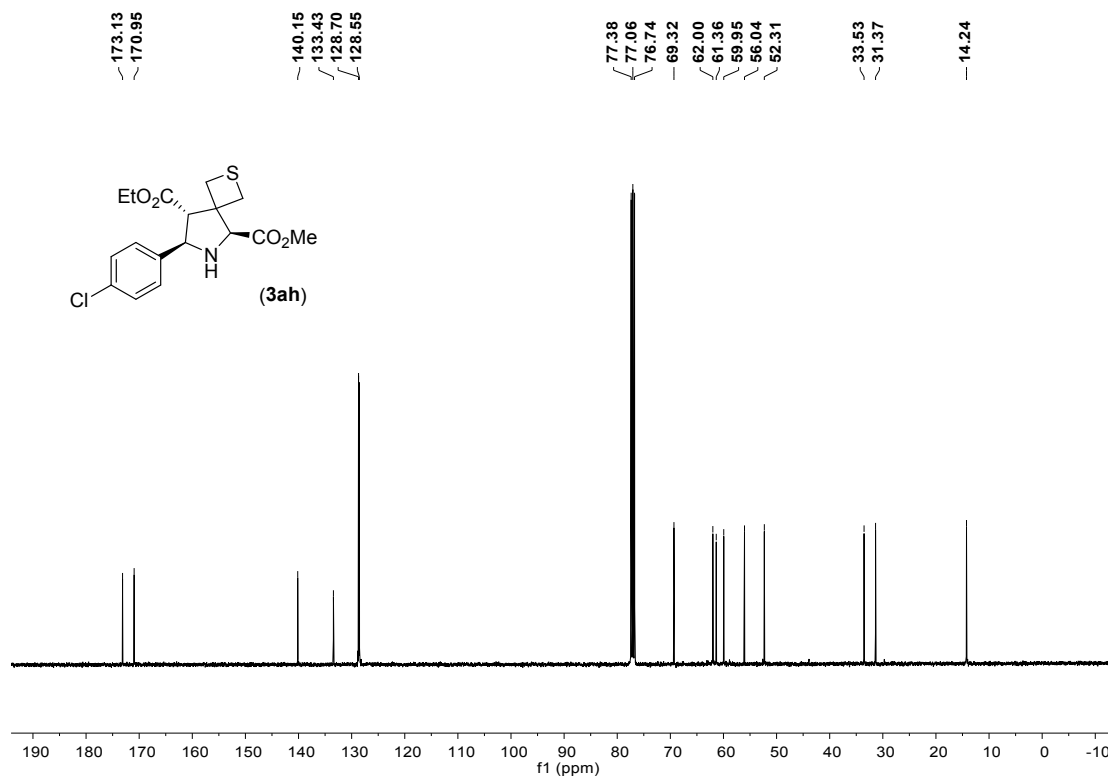



<sup>1</sup>H NMR spectrum of compound **3ai** (CDCl<sub>3</sub>)

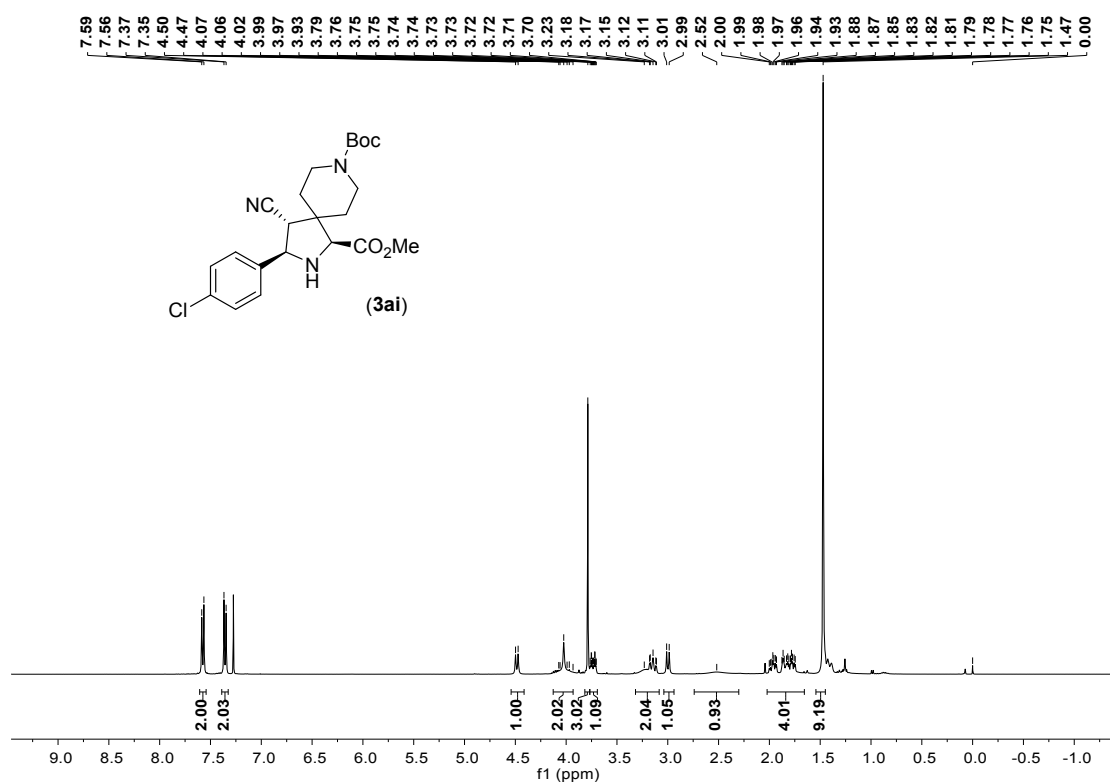

<sup>13</sup>C NMR spectrum of compound **3ai** (CDCl<sub>3</sub>)

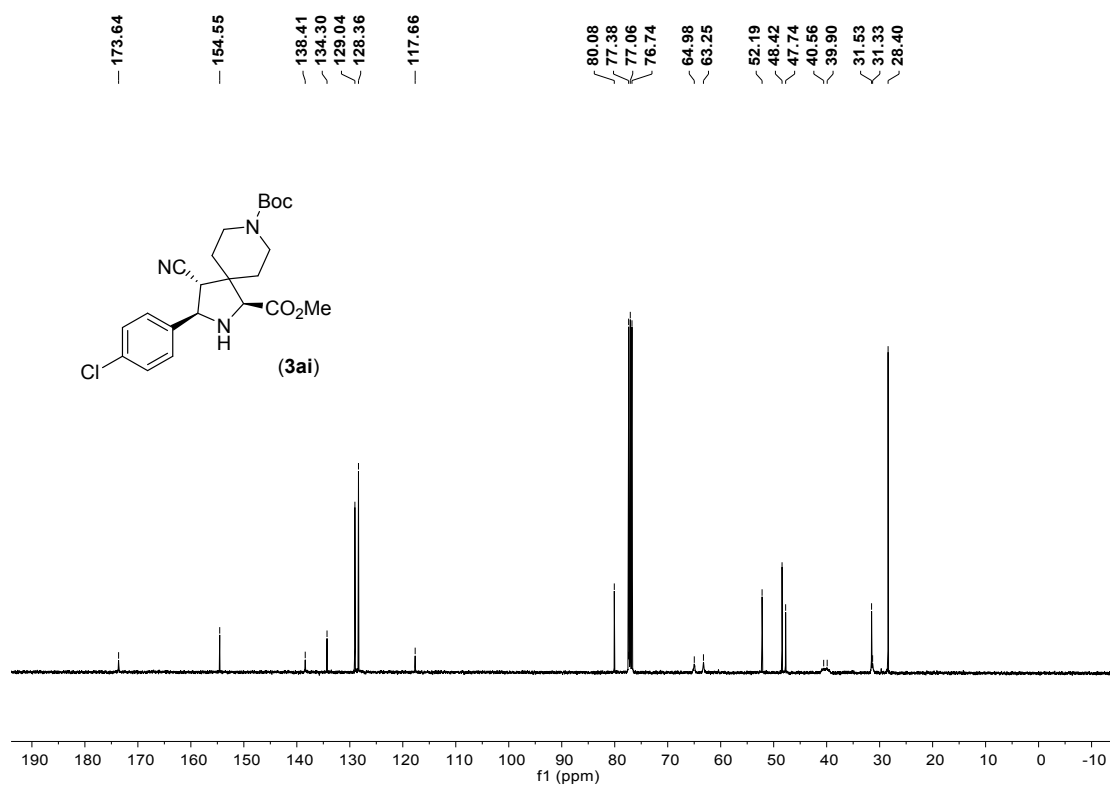

<sup>1</sup>H NMR spectrum of compound **4aa** (CDCl<sub>3</sub>)

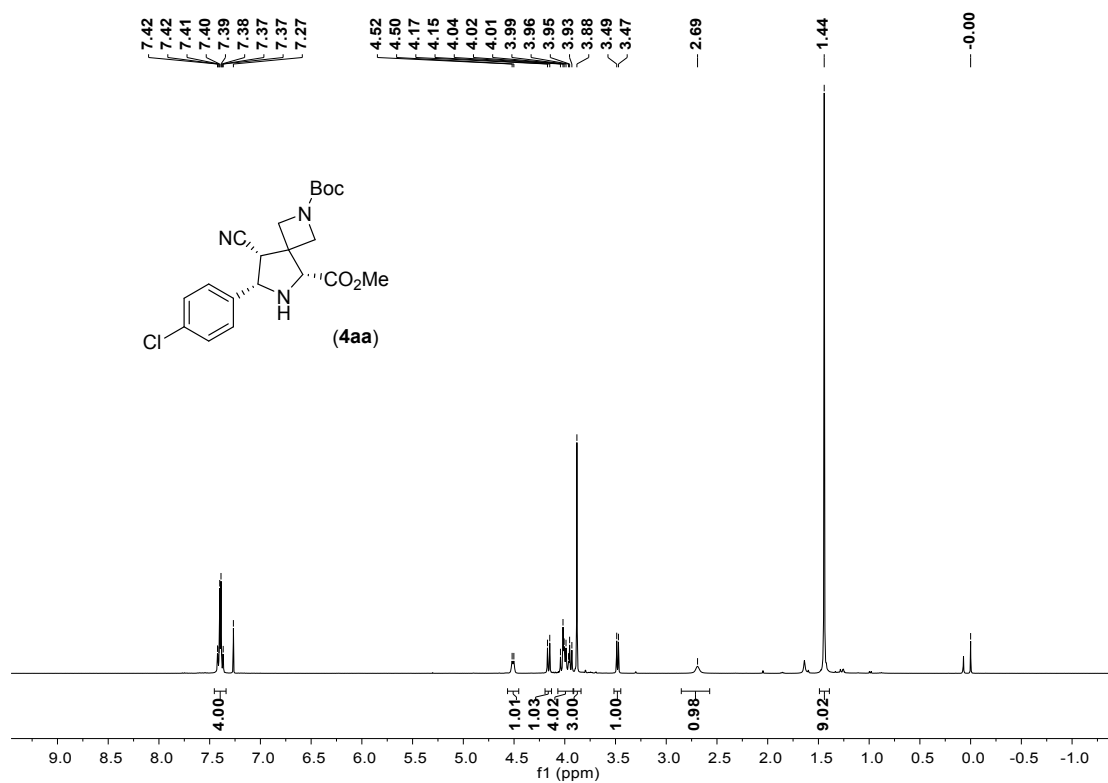

<sup>13</sup>C NMR spectrum of compound **4aa** (CDCl<sub>3</sub>)

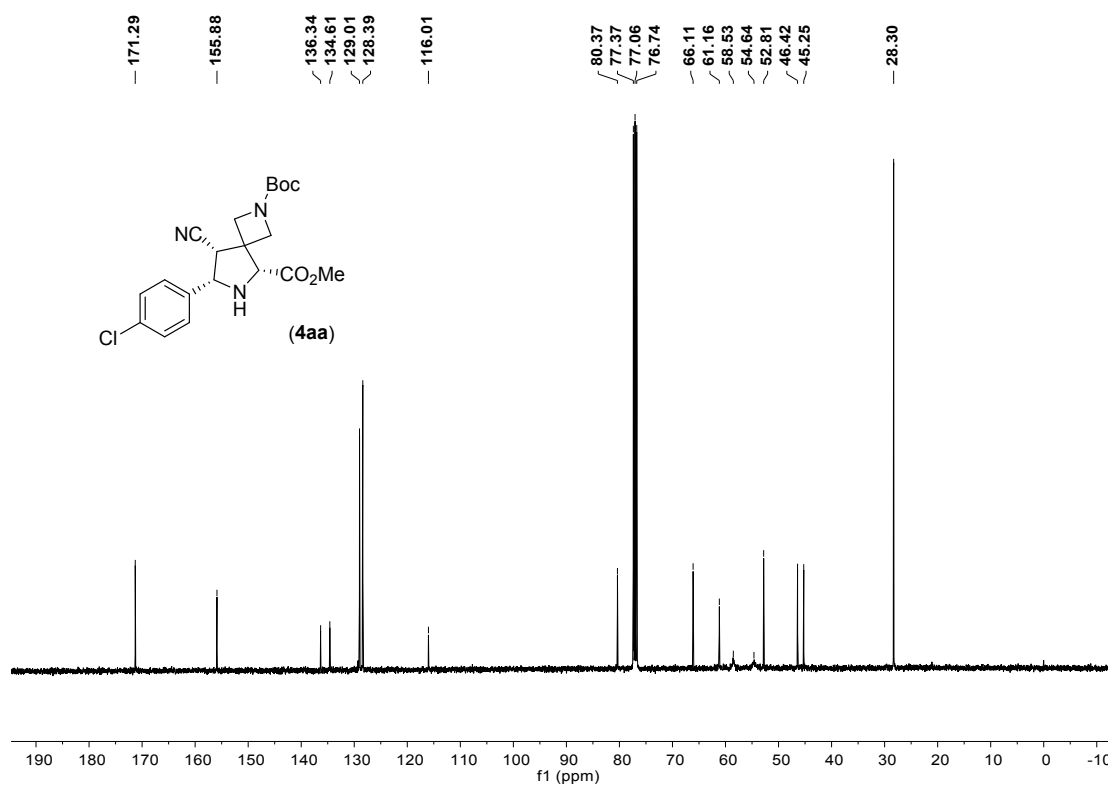

<sup>1</sup>H NMR spectrum of compound **4da** (CDCl<sub>3</sub>)

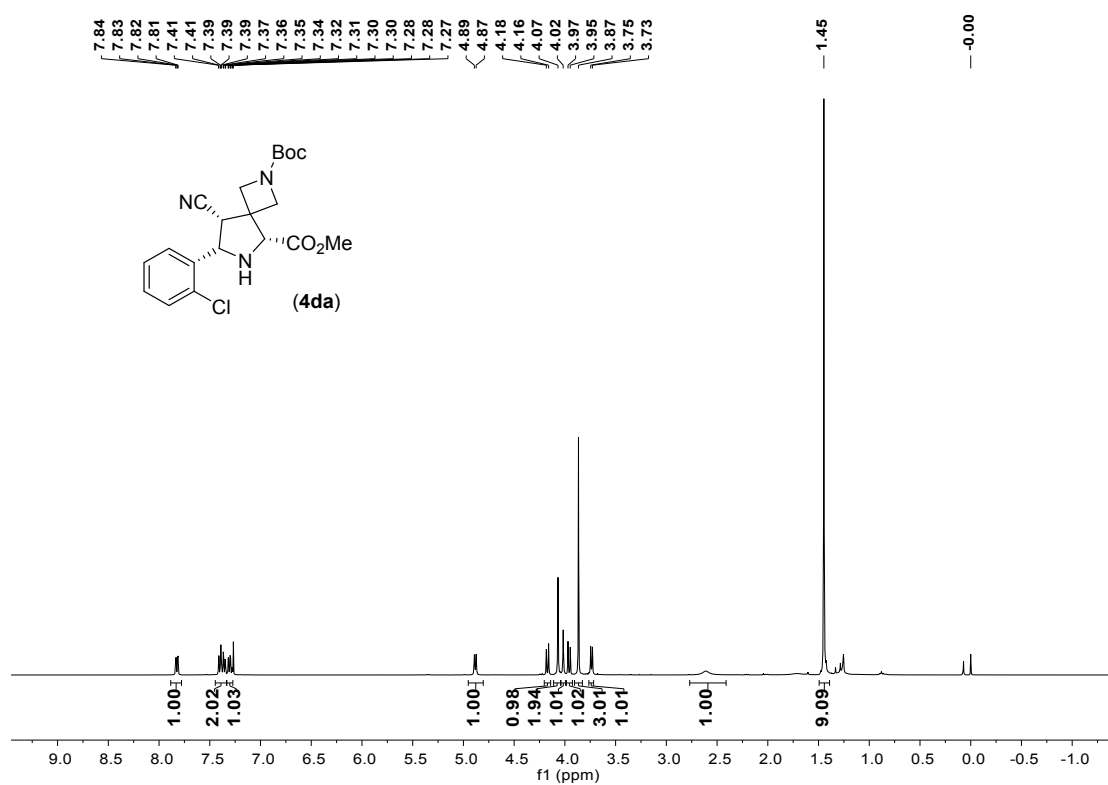

<sup>13</sup>C NMR spectrum of compound **4da** (CDCl<sub>3</sub>)

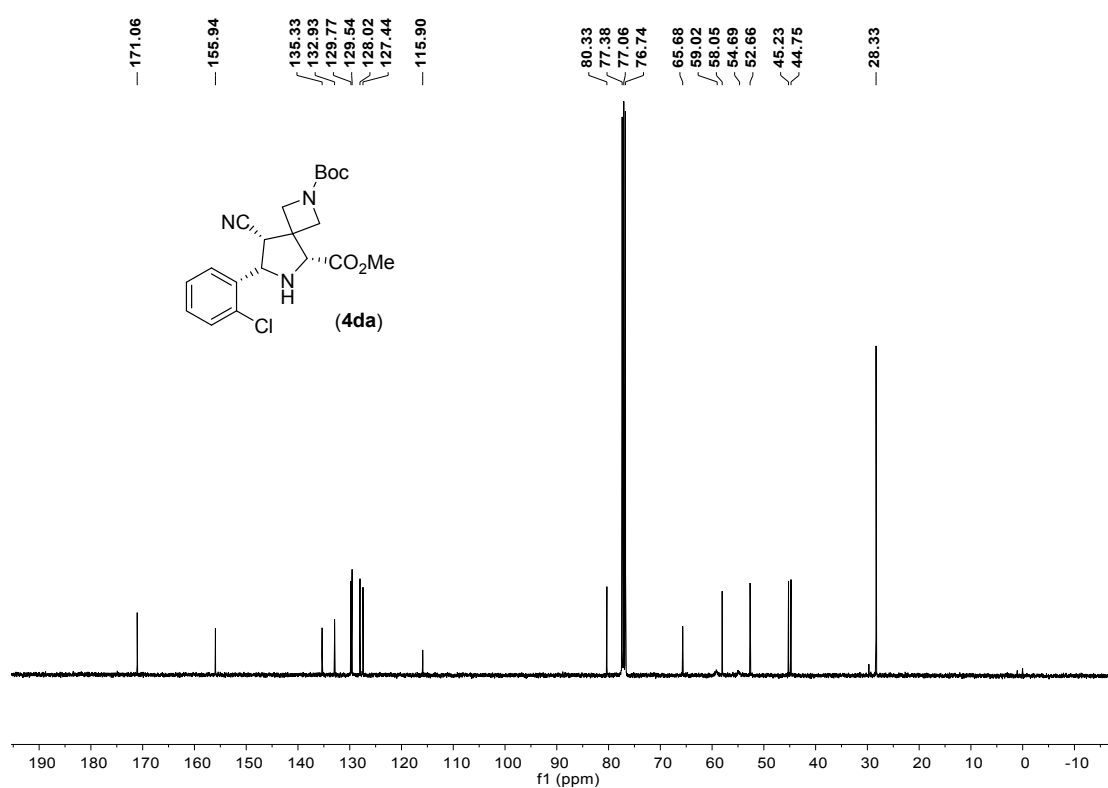

<sup>1</sup>H NMR spectrum of compound **4fa** (CDCl<sub>3</sub>)

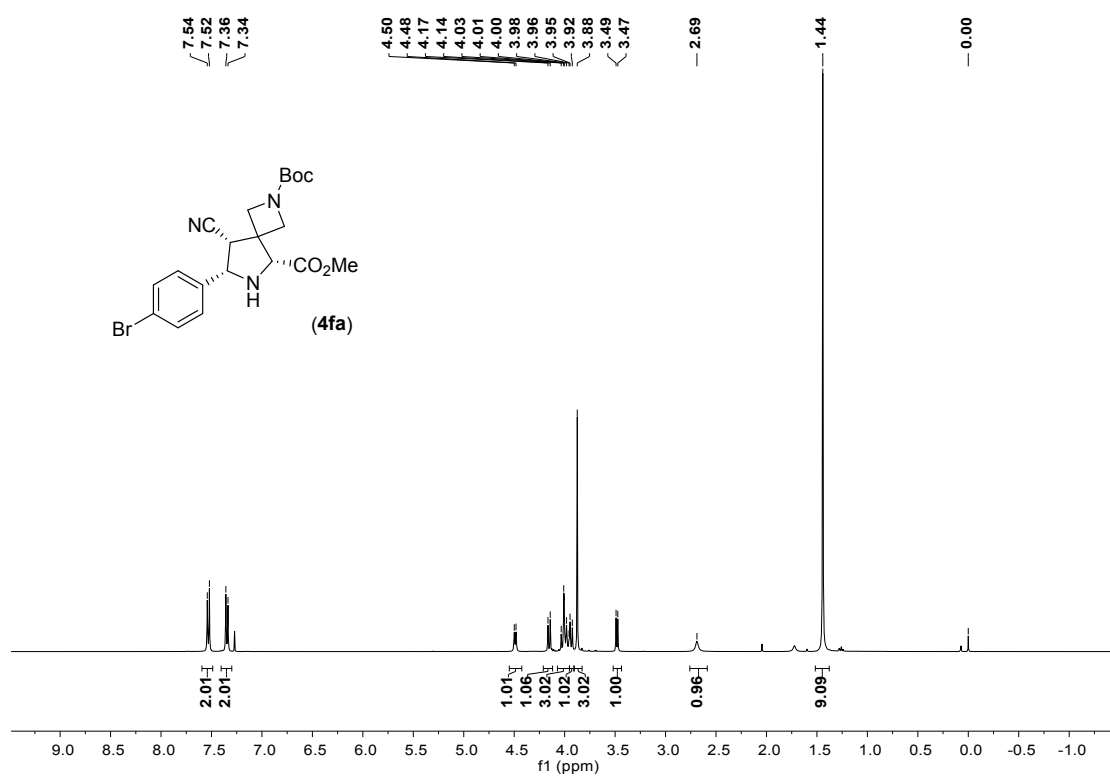

<sup>13</sup>C NMR spectrum of compound **4fa** (CDCl<sub>3</sub>)

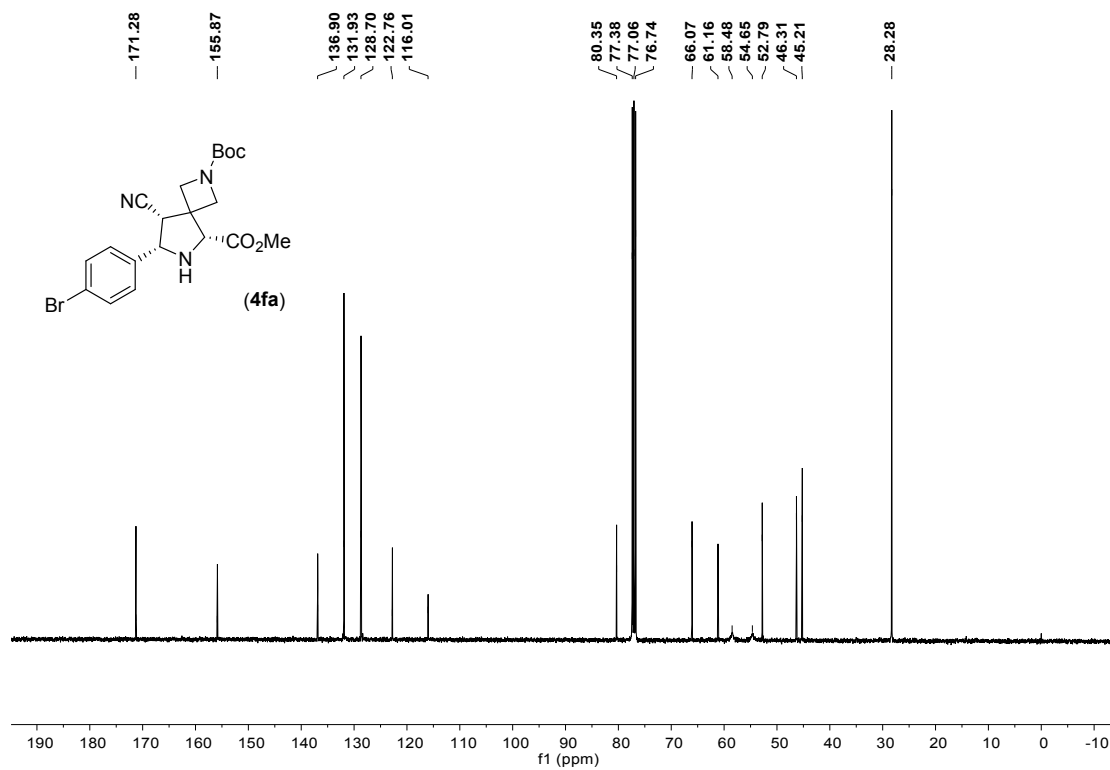

<sup>1</sup>H NMR spectrum of compound **4ia** (CDCl<sub>3</sub>)

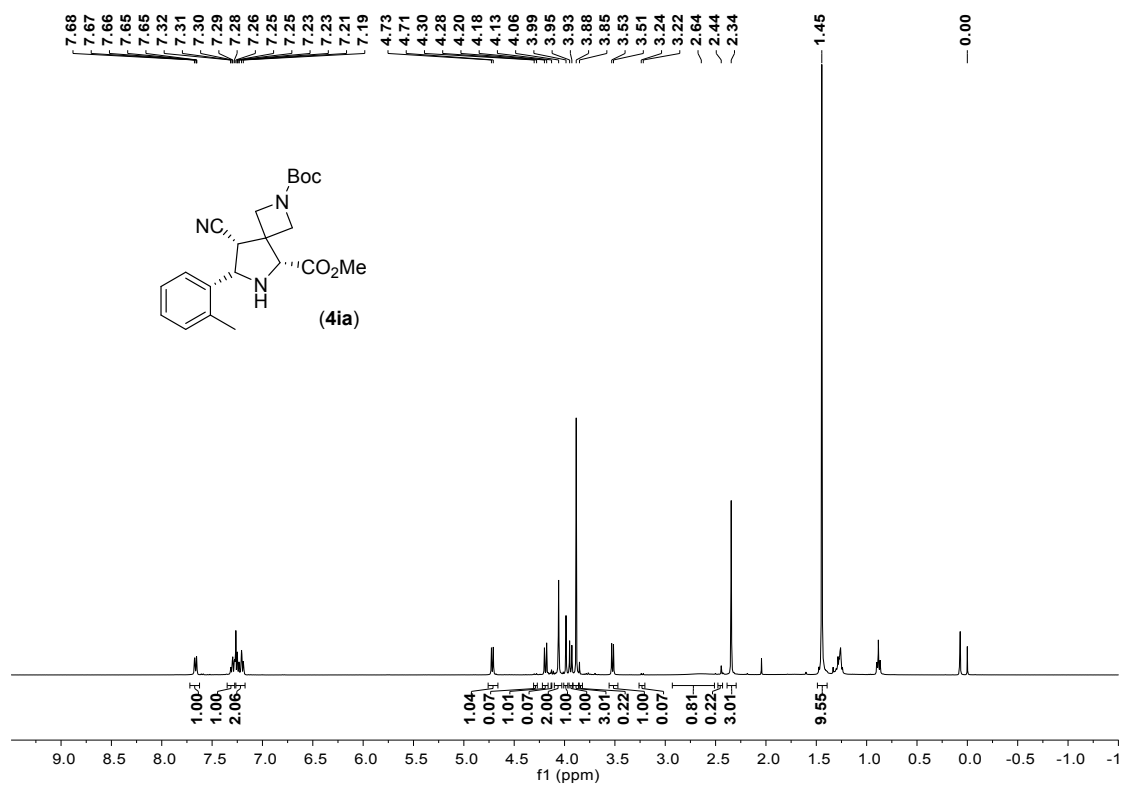

<sup>13</sup>C NMR spectrum of compound **4ia** (CDCl<sub>3</sub>)

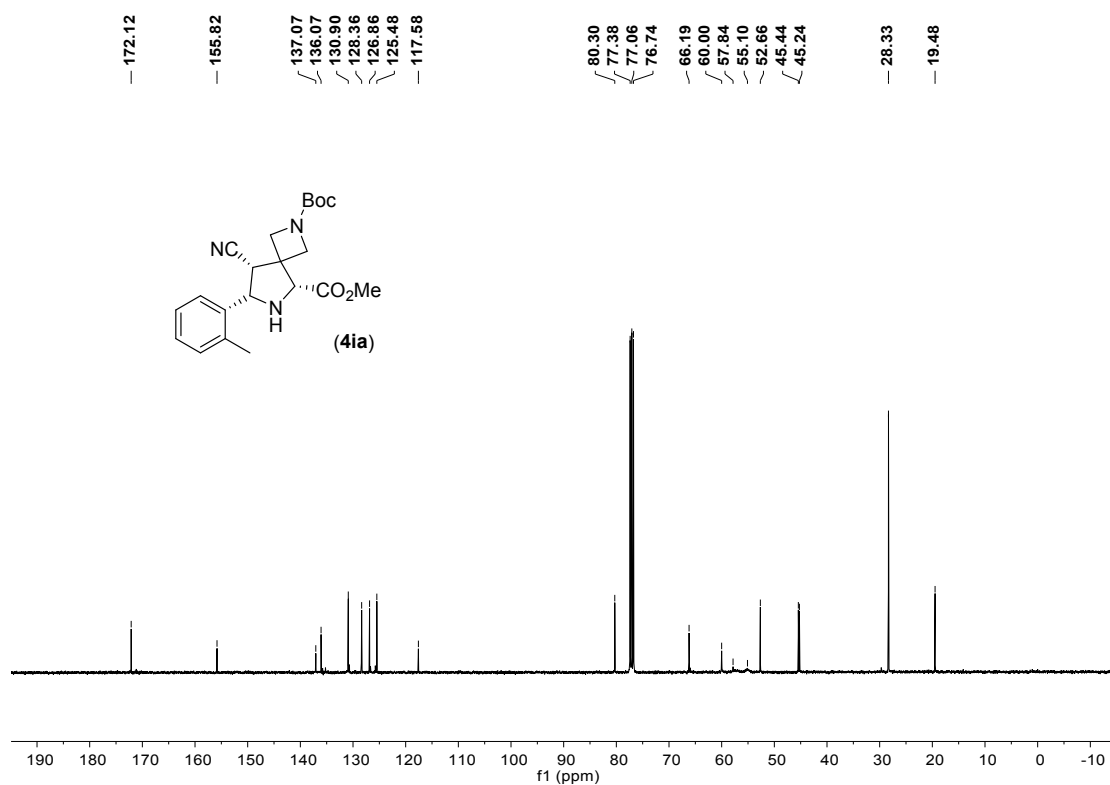

<sup>1</sup>H NMR spectrum of compound **40a** (CDCl<sub>3</sub>)

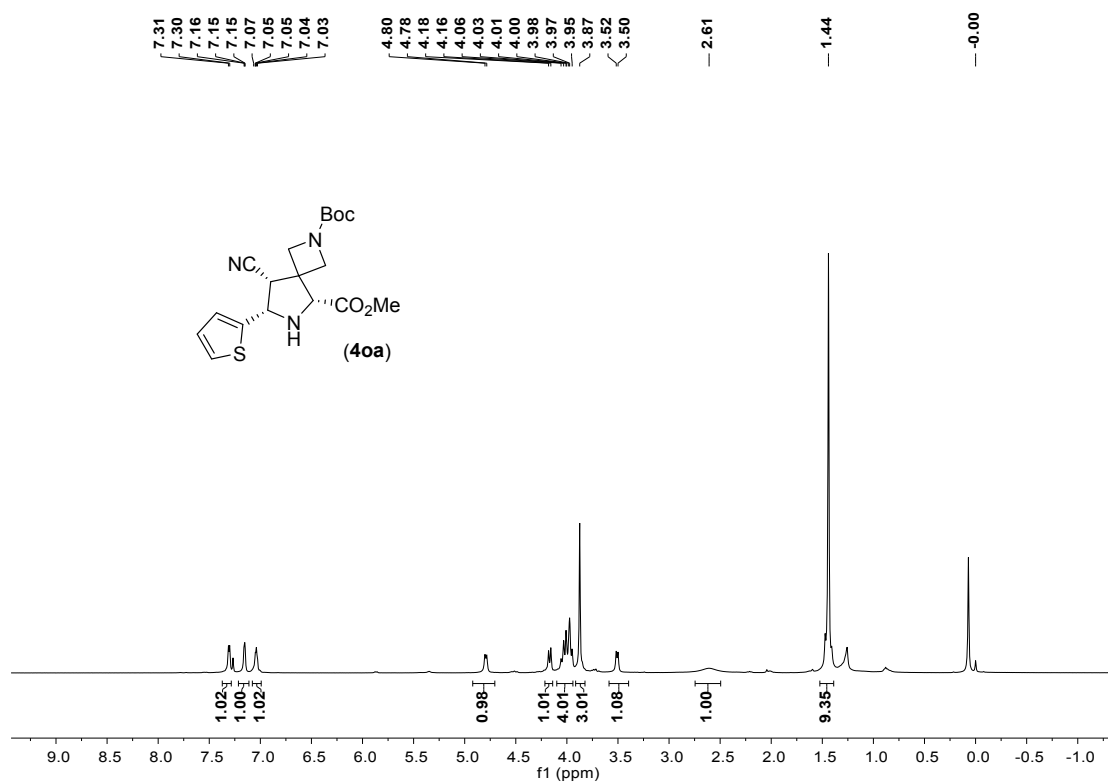

<sup>13</sup>C NMR spectrum of compound **40a** (CDCl<sub>3</sub>)

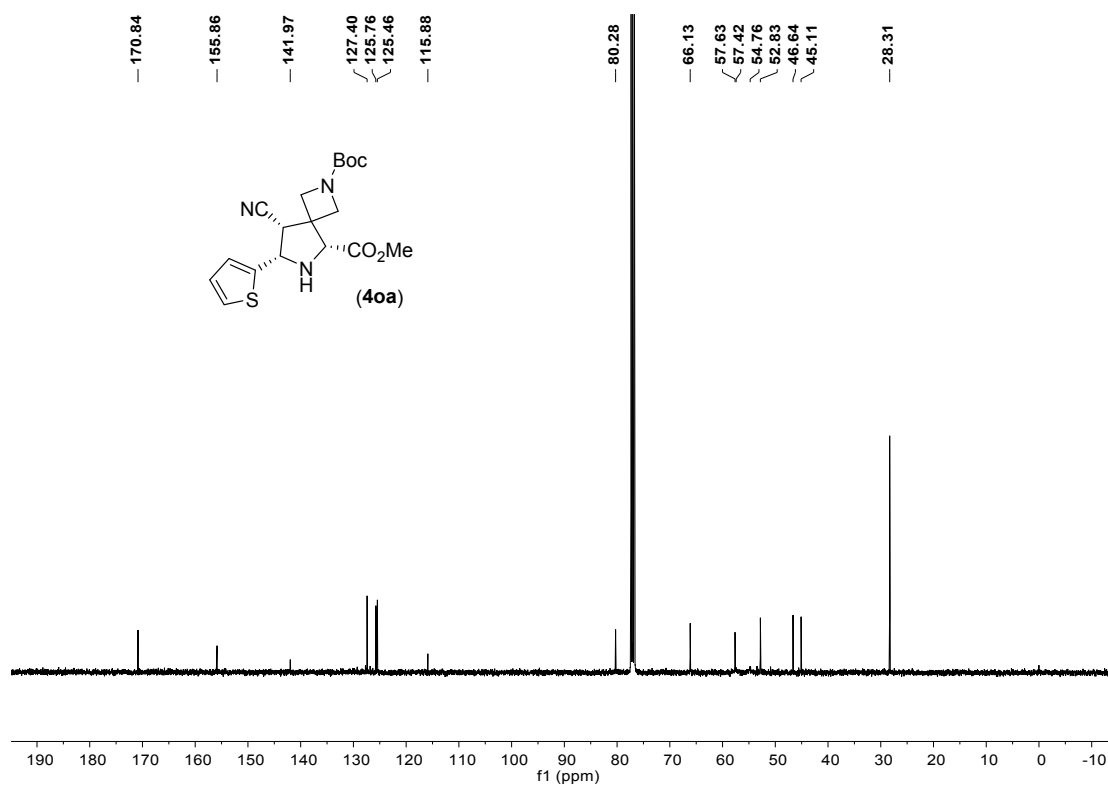

<sup>1</sup>H NMR spectrum of compound **4ab** (CDCl<sub>3</sub>)

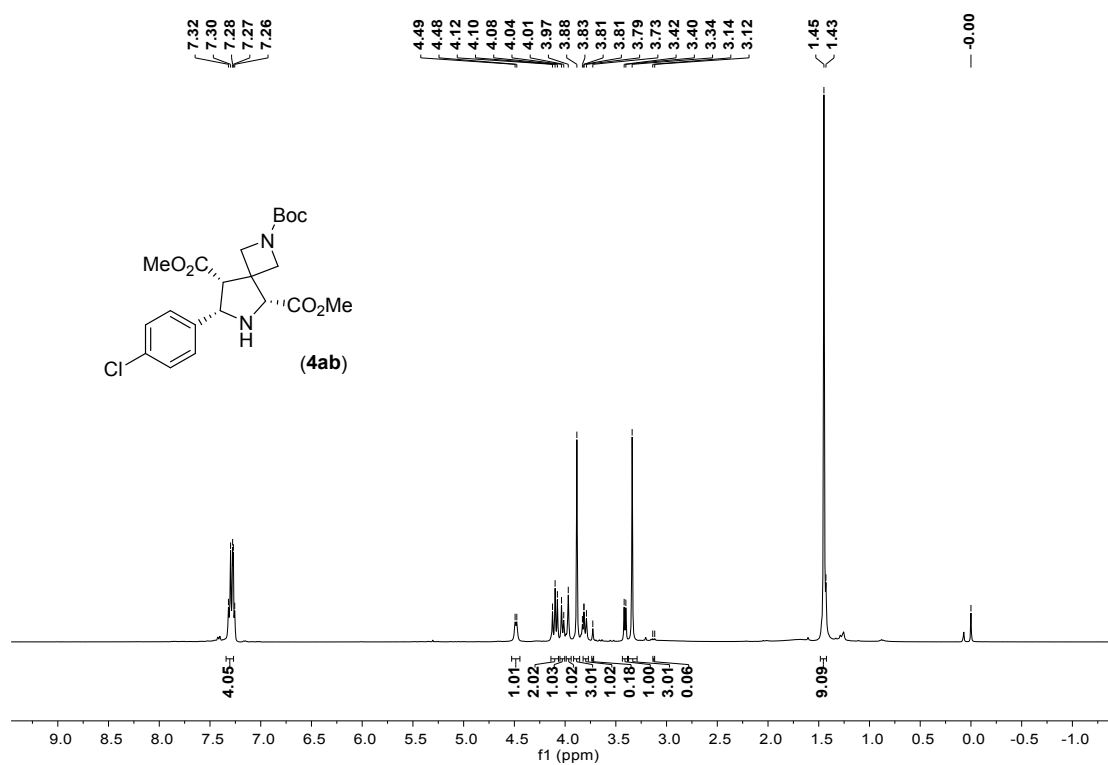

<sup>13</sup>C NMR spectrum of compound **4ab** (CDCl<sub>3</sub>)

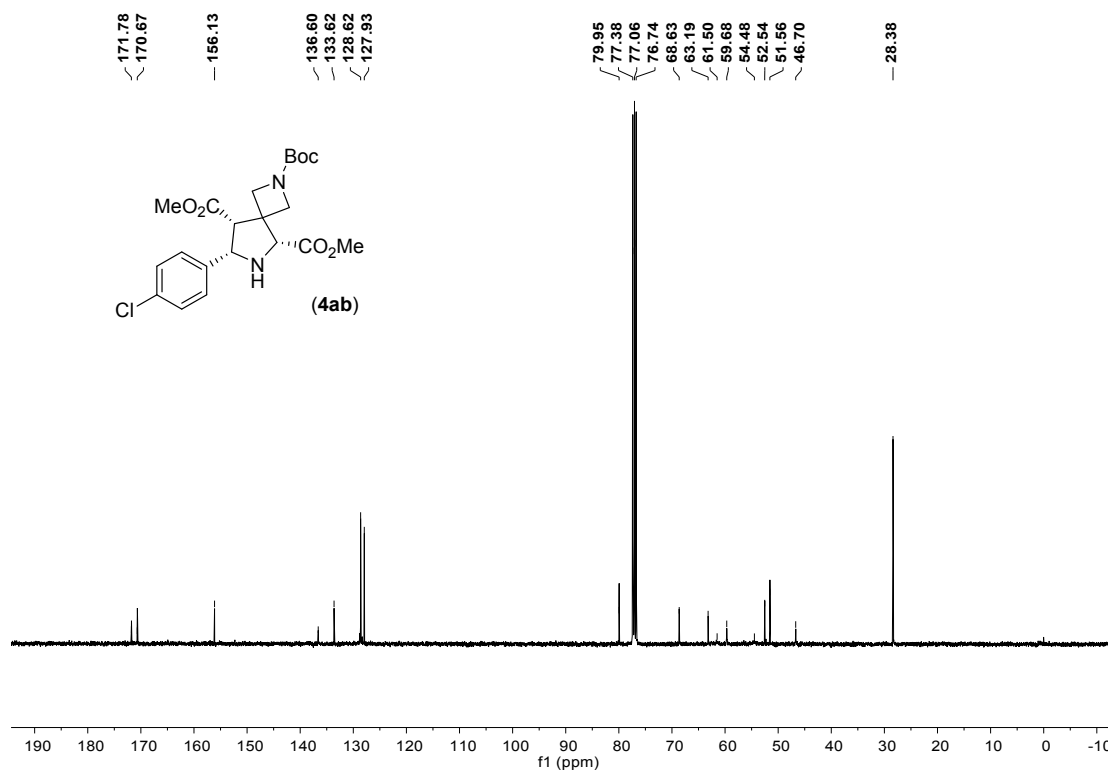

<sup>1</sup>H NMR spectrum of compound **4ae** (CDCl<sub>3</sub>)

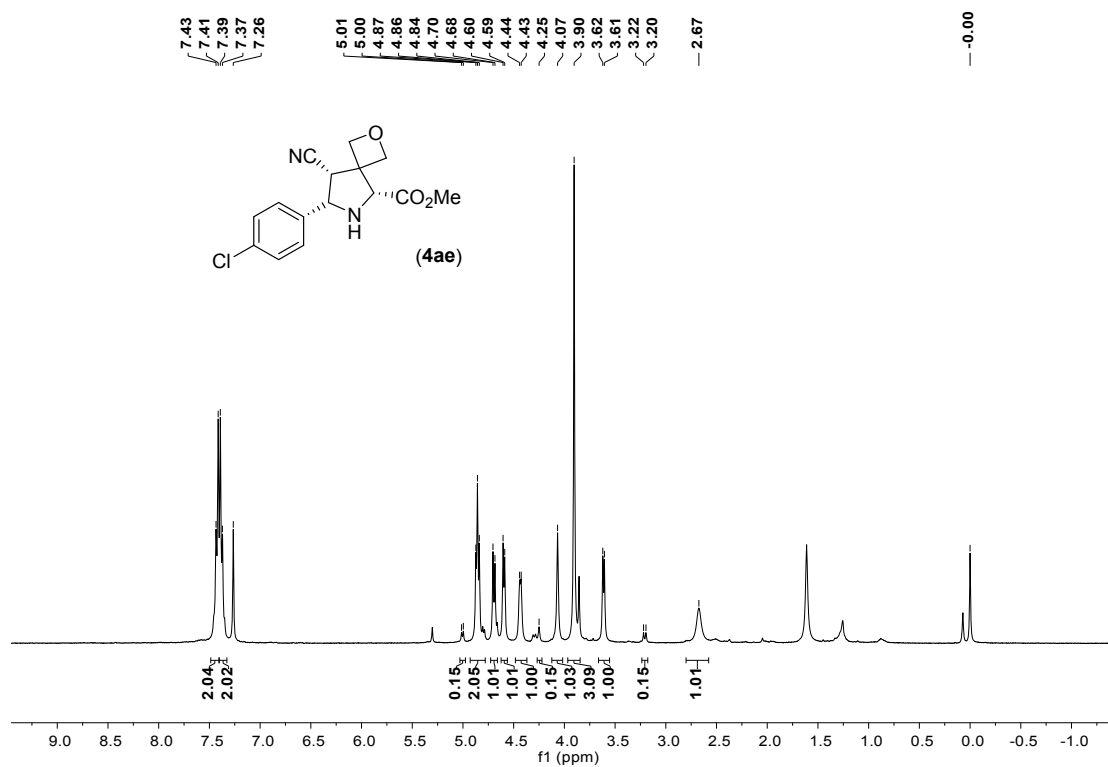

<sup>13</sup>C NMR spectrum of compound **4ae** (CDCl<sub>3</sub>)

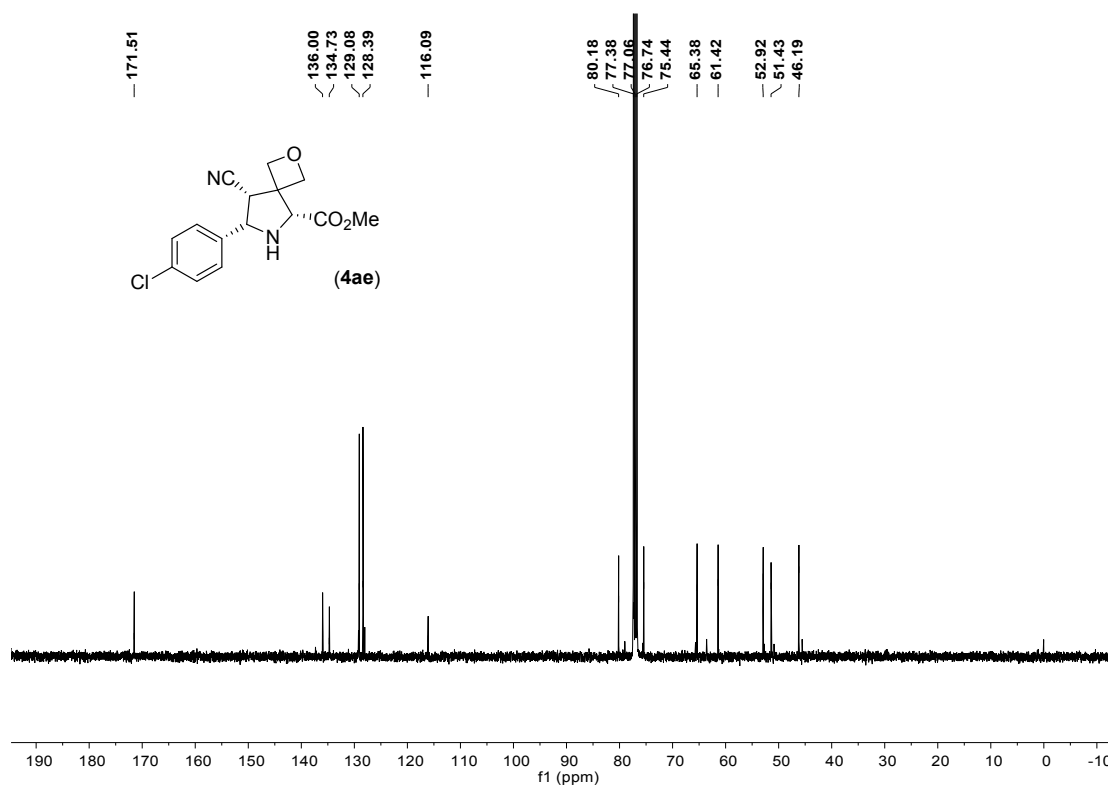



<sup>1</sup>H NMR spectrum of compound **5** (CDCl<sub>3</sub>)

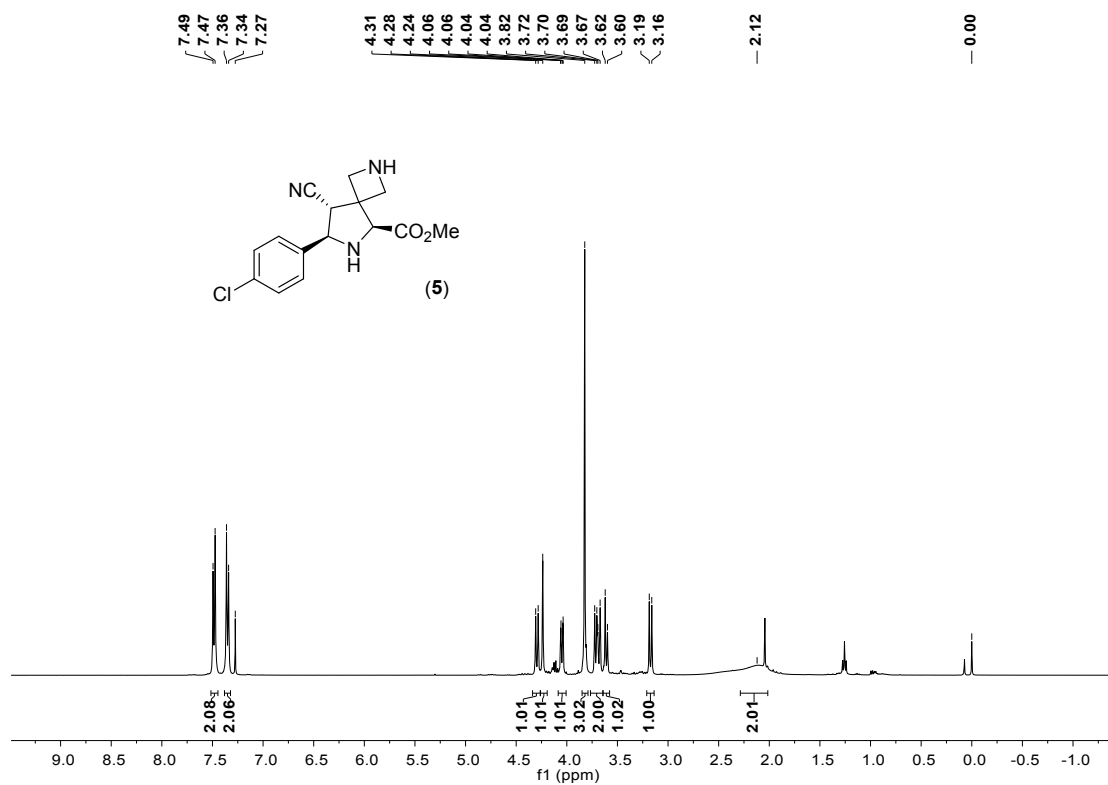

<sup>13</sup>C NMR spectrum of compound **5** (CDCl<sub>3</sub>)

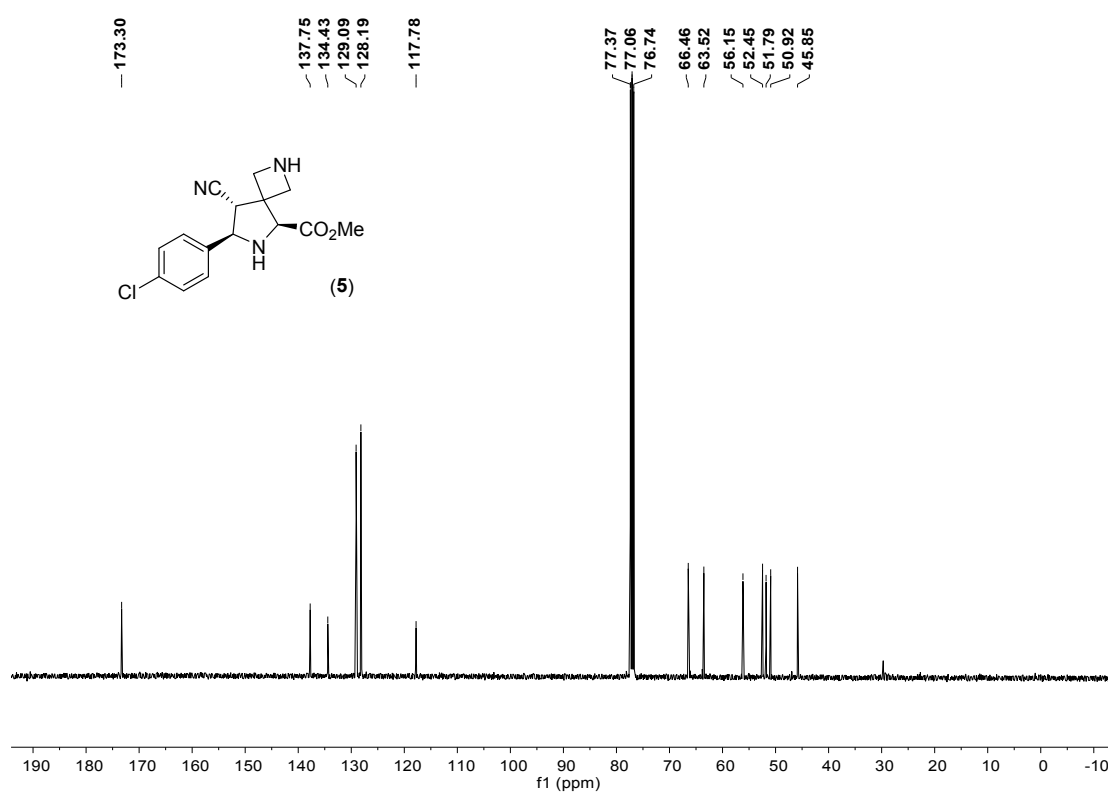

<sup>1</sup>H NMR spectrum of compound **6** (CDCl<sub>3</sub>)

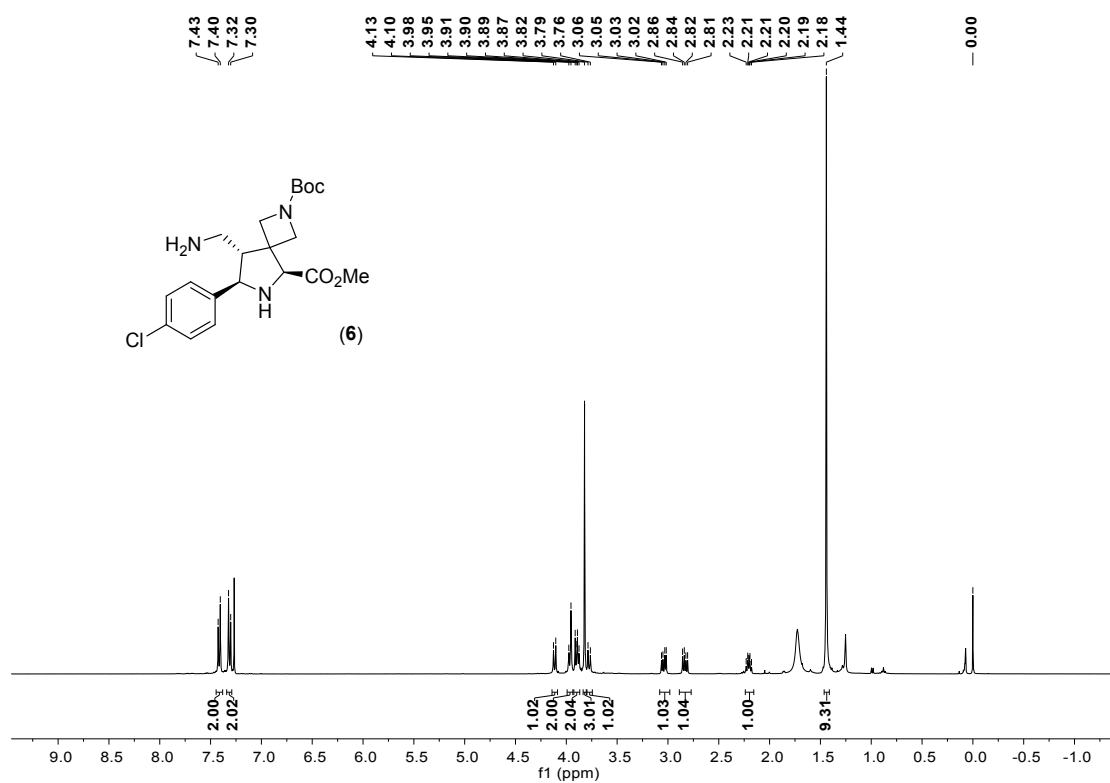

<sup>13</sup>C NMR spectrum of compound **6** (CDCl<sub>3</sub>)

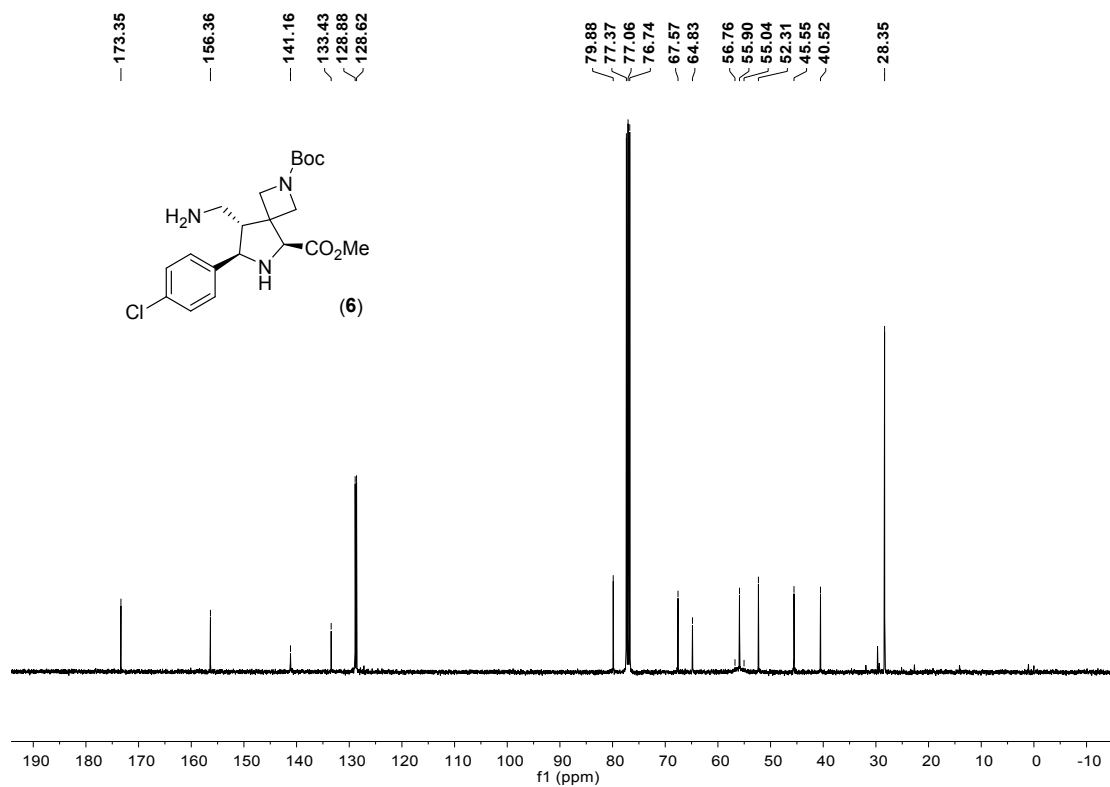

Supplement: c9cc03589c1.pdf [file c9cc03589c1.pdf]
